# Supplementary material for: Improving parallel executions by increasing task granularity in task-based runtime systems using acyclic DAG clustering
Source: PeerJ Comput Sci. 2020 Jan 13;6:e247. doi: 10.7717/peerj-cs.247 (PMC7924455; doi:10.7717/peerj-cs.247)
Supplement: Supplemental Information 1 — Each line corresponds to the record of a single execution. [file peerj-cs-06-247-s001.csv]

jobid	testsize	nbthreads	clustersize	duration	cputime	hostname	algo	nbnodes	nbnodesclustered	degreeofparallelism1	degreeofparallelism2	overheadtotal	durationwithoverhead	overheadpertask	overheadperpop	overheadperpush	durationwithoutoverhead
1104613	40	32	1	0.297511	6.680000	Intel-32t-2s	G	19200	19200	120	92.7583	350	13458.5	2.8	0.35	0.35	624
1104613	40	32	10	0.060789	0.460000	Intel-32t-2s	G	19200	1920	17	9.67083	350	3150.1	2.8	0.35	0.35	2220
1104613	40	32	1	0.102938	1.870000	Intel-32t-2s	GUPDATE	19200	19200	120	92.7583	350	13458.5	2.8	0.35	0.35	624
1104613	40	32	10	0.062369	0.470000	Intel-32t-2s	GUPDATE	19200	1920	17	9.82135	350	3097.9	2.8	0.35	0.35	2200
1104613	40	32	10	0.044780	0.450000	Intel-32t-2s	GSTOP	19200	2739	22	16.6999	350	2268.8	2.8	0.35	0.35	1355
1104613	40	32	10	0.060481	0.450000	Intel-32t-2s	GUPDATE	19200	1920	17	9.82135	350	3097.9	2.8	0.35	0.35	2200
1104613	40	32	10	0.046814	0.510000	Intel-32t-2s	GSTOP	19200	2739	22	16.6999	350	2268.8	2.8	0.35	0.35	1355
1104613	40	32	10	0.044148	0.460000	Intel-32t-2s	GSTOP_REFINEMENT	19200	2650	22	16.36	350	2209.65	2.8	0.35	0.35	1395
1104613	40	32	10	0.062881	0.460000	Intel-32t-2s	GUPDATE_REFINEMENT	19200	1711	16	9.94506	350	2907.3	2.8	0.35	0.35	2210
1104613	40	32	10	0.044875	0.460000	Intel-32t-2s	GSTOP_REFINEMENT	19200	2650	22	16.36	350	2209.65	2.8	0.35	0.35	1395
1104613	40	32	10	0.063138	0.470000	Intel-32t-2s	GUPDATE_REFINEMENT	19200	1711	16	9.94506	350	2907.3	2.8	0.35	0.35	2210
1104613	40	32	10	0.064722	0.490000	Intel-32t-2s	G	19200	1920	17	9.67083	350	3150.1	2.8	0.35	0.35	2220
1104613	40	32	10	0.062113	0.470000	Intel-32t-2s	GUPDATE	19200	1920	17	9.82135	350	3097.9	2.8	0.35	0.35	2200
1104613	40	32	10	0.045253	0.460000	Intel-32t-2s	GSTOP	19200	2739	22	16.6999	350	2268.8	2.8	0.35	0.35	1355
1104613	40	32	10	0.046514	0.460000	Intel-32t-2s	GSTOP_REFINEMENT	19200	2650	22	16.36	350	2209.65	2.8	0.35	0.35	1395
1104613	40	32	10	0.066987	0.480000	Intel-32t-2s	GUPDATE_REFINEMENT	19200	1711	16	9.94506	350	2907.3	2.8	0.35	0.35	2210
1104613	40	32	10	0.061406	0.460000	Intel-32t-2s	G	19200	1920	17	9.67083	350	3150.1	2.8	0.35	0.35	2220
1104613	40	32	11	0.066866	0.460000	Intel-32t-2s	G	19200	1746	15	8.49255	350	3506.15	2.8	0.35	0.35	2502
1104613	40	32	1	0.095118	1.950000	Intel-32t-2s	GSTOP	19200	19200	120	92.7583	350	13458.5	2.8	0.35	0.35	624
1104613	40	32	1	0.182035	3.850000	Intel-32t-2s	GUPDATE	19200	19200	120	92.7583	350	13458.5	2.8	0.35	0.35	624
1104613	40	32	11	0.065528	0.460000	Intel-32t-2s	GUPDATE	19200	1746	16	8.82818	350	3441.15	2.8	0.35	0.35	2469
1104613	40	32	1	0.143853	3.130000	Intel-32t-2s	GSTOP	19200	19200	120	92.7583	350	13458.5	2.8	0.35	0.35	624
1104613	40	32	11	0.048999	0.550000	Intel-32t-2s	GSTOP	19200	2443	24	17.7978	350	2106	2.8	0.35	0.35	1330
1104613	40	32	11	0.068058	0.450000	Intel-32t-2s	GUPDATE	19200	1746	16	8.82818	350	3441.15	2.8	0.35	0.35	2469
1104613	40	32	11	0.043701	0.460000	Intel-32t-2s	GSTOP	19200	2443	24	17.7978	350	2106	2.8	0.35	0.35	1330
1104613	40	32	11	0.044770	0.450000	Intel-32t-2s	GSTOP_REFINEMENT	19200	2355	24	17.1516	350	2038.85	2.8	0.35	0.35	1369
1104613	40	32	11	0.069802	0.480000	Intel-32t-2s	GUPDATE_REFINEMENT	19200	1505	14	8.69103	350	3193.85	2.8	0.35	0.35	2491
1104613	40	32	1	0.077142	1.470000	Intel-32t-2s	GSTOP_REFINEMENT	19200	14161	104	53.9888	350	9933.9	2.8	0.35	0.35	707
1104613	40	32	11	0.043959	0.470000	Intel-32t-2s	GSTOP_REFINEMENT	19200	2355	24	17.1516	350	2038.85	2.8	0.35	0.35	1369
1104613	40	32	1	0.177013	3.710000	Intel-32t-2s	GUPDATE_REFINEMENT	19200	14193	90	52.3682	350	9956.5	2.8	0.35	0.35	722
1104613	40	32	11	0.067153	0.460000	Intel-32t-2s	GUPDATE_REFINEMENT	19200	1505	14	8.69103	350	3193.85	2.8	0.35	0.35	2491
1104613	40	32	11	0.067895	0.460000	Intel-32t-2s	G	19200	1746	15	8.49255	350	3506.15	2.8	0.35	0.35	2502
1104613	40	32	11	0.068236	0.480000	Intel-32t-2s	GUPDATE	19200	1746	16	8.82818	350	3441.15	2.8	0.35	0.35	2469
1104613	40	32	11	0.044826	0.460000	Intel-32t-2s	GSTOP	19200	2443	24	17.7978	350	2106	2.8	0.35	0.35	1330
1104613	40	32	11	0.043502	0.450000	Intel-32t-2s	GSTOP_REFINEMENT	19200	2355	24	17.1516	350	2038.85	2.8	0.35	0.35	1369
1104613	40	32	11	0.070177	0.470000	Intel-32t-2s	GUPDATE_REFINEMENT	19200	1505	14	8.69103	350	3193.85	2.8	0.35	0.35	2491
1104613	40	32	11	0.067715	0.460000	Intel-32t-2s	G	19200	1746	15	8.49255	350	3506.15	2.8	0.35	0.35	2502
1104613	40	32	12	0.040878	0.420000	Intel-32t-2s	G	19200	1600	29	18.0825	350	1880.6	2.8	0.35	0.35	1356
1104613	40	32	1	0.085171	1.650000	Intel-32t-2s	GSTOP_REFINEMENT	19200	14161	104	53.9888	350	9933.9	2.8	0.35	0.35	707
1104613	40	32	12	0.048557	0.510000	Intel-32t-2s	GUPDATE	19200	1600	31	18.6006	350	1905.5	2.8	0.35	0.35	1368
1104613	40	32	12	0.037359	0.440000	Intel-32t-2s	GSTOP	19200	1620	32	23.6488	350	1355.35	2.8	0.35	0.35	916
1104613	40	32	12	0.041765	0.430000	Intel-32t-2s	GUPDATE	19200	1600	31	18.6006	350	1905.5	2.8	0.35	0.35	1368
1104613	40	32	12	0.038221	0.430000	Intel-32t-2s	GSTOP	19200	1620	32	23.6488	350	1355.35	2.8	0.35	0.35	916
1104613	40	32	12	0.040158	0.450000	Intel-32t-2s	GSTOP_REFINEMENT	19200	1553	29	22.3123	350	1306.95	2.8	0.35	0.35	976
1104613	40	32	12	0.045184	0.450000	Intel-32t-2s	GUPDATE_REFINEMENT	19200	1486	27	17.5747	350	1788.5	2.8	0.35	0.35	1392
1104613	40	32	12	0.036270	0.430000	Intel-32t-2s	GSTOP_REFINEMENT	19200	1553	29	22.3123	350	1306.95	2.8	0.35	0.35	976
1104613	40	32	12	0.040744	0.430000	Intel-32t-2s	GUPDATE_REFINEMENT	19200	1486	27	17.5747	350	1788.5	2.8	0.35	0.35	1392
1104613	40	32	12	0.040862	0.430000	Intel-32t-2s	G	19200	1600	29	18.0825	350	1880.6	2.8	0.35	0.35	1356
1104613	40	32	12	0.043953	0.440000	Intel-32t-2s	GUPDATE	19200	1600	31	18.6006	350	1905.5	2.8	0.35	0.35	1368
1104613	40	32	12	0.032916	0.440000	Intel-32t-2s	GSTOP	19200	1620	32	23.6488	350	1355.35	2.8	0.35	0.35	916
1104613	40	32	12	0.035785	0.440000	Intel-32t-2s	GSTOP_REFINEMENT	19200	1553	29	22.3123	350	1306.95	2.8	0.35	0.35	976
1104613	40	32	12	0.042778	0.430000	Intel-32t-2s	GUPDATE_REFINEMENT	19200	1486	27	17.5747	350	1788.5	2.8	0.35	0.35	1392
1104613	40	32	12	0.040031	0.440000	Intel-32t-2s	G	19200	1600	29	18.0825	350	1880.6	2.8	0.35	0.35	1356
1104613	40	32	13	0.069167	0.460000	Intel-32t-2s	G	19200	1477	14	7.90928	350	3615.85	2.8	0.35	0.35	2716
1104613	40	32	1	0.109585	2.180000	Intel-32t-2s	GUPDATE_REFINEMENT	19200	14193	90	52.3682	350	9956.5	2.8	0.35	0.35	722
1104613	40	32	13	0.070418	0.460000	Intel-32t-2s	GUPDATE	19200	1477	14	7.65741	350	3740.45	2.8	0.35	0.35	2807
1104613	40	32	13	0.050896	0.440000	Intel-32t-2s	GSTOP	19200	1879	18	12.3635	350	2483.35	2.8	0.35	0.35	1819
1104613	40	32	13	0.070405	0.450000	Intel-32t-2s	GUPDATE	19200	1477	14	7.65741	350	3740.45	2.8	0.35	0.35	2807
1104613	40	32	13	0.057205	0.430000	Intel-32t-2s	GSTOP	19200	1879	18	12.3635	350	2483.35	2.8	0.35	0.35	1819
1104613	40	32	13	0.052802	0.440000	Intel-32t-2s	GSTOP_REFINEMENT	19200	1813	18	12.3061	350	2429.35	2.8	0.35	0.35	1826
1104613	40	32	13	0.075699	0.480000	Intel-32t-2s	GUPDATE_REFINEMENT	19200	1278	13	7.79969	350	3503.2	2.8	0.35	0.35	2833
1104613	40	32	13	0.052302	0.440000	Intel-32t-2s	GSTOP_REFINEMENT	19200	1813	18	12.3061	350	2429.35	2.8	0.35	0.35	1826
1104613	40	32	13	0.074925	0.450000	Intel-32t-2s	GUPDATE_REFINEMENT	19200	1278	13	7.79969	350	3503.2	2.8	0.35	0.35	2833
1104613	40	32	13	0.069944	0.470000	Intel-32t-2s	G	19200	1477	14	7.90928	350	3615.85	2.8	0.35	0.35	2716
1104613	40	32	13	0.069868	0.450000	Intel-32t-2s	GUPDATE	19200	1477	14	7.65741	350	3740.45	2.8	0.35	0.35	2807
1104613	40	32	13	0.051205	0.430000	Intel-32t-2s	GSTOP	19200	1879	18	12.3635	350	2483.35	2.8	0.35	0.35	1819
1104613	40	32	13	0.050753	0.440000	Intel-32t-2s	GSTOP_REFINEMENT	19200	1813	18	12.3061	350	2429.35	2.8	0.35	0.35	1826
1104613	40	32	13	0.074961	0.460000	Intel-32t-2s	GUPDATE_REFINEMENT	19200	1278	13	7.79969	350	3503.2	2.8	0.35	0.35	2833
1104613	40	32	13	0.069541	0.470000	Intel-32t-2s	G	19200	1477	14	7.90928	350	3615.85	2.8	0.35	0.35	2716
1104613	40	32	14	0.073181	0.450000	Intel-32t-2s	G	19200	1372	12	7.23542	350	3815.7	2.8	0.35	0.35	2912
1104613	40	32	1	0.181140	3.300000	Intel-32t-2s	G	19200	19200	120	92.7583	350	13458.5	2.8	0.35	0.35	624
1104613	40	32	14	0.070239	0.450000	Intel-32t-2s	GUPDATE	19200	1372	13	7.6793	350	3565.5	2.8	0.35	0.35	2736
1104613	40	32	14	0.043790	0.460000	Intel-32t-2s	GSTOP	19200	1875	27	17.1323	350	1941.65	2.8	0.35	0.35	1320
1104613	40	32	14	0.071617	0.470000	Intel-32t-2s	GUPDATE	19200	1372	13	7.6793	350	3565.5	2.8	0.35	0.35	2736
1104613	40	32	14	0.043305	0.480000	Intel-32t-2s	GSTOP	19200	1875	27	17.1323	350	1941.65	2.8	0.35	0.35	1320
1104613	40	32	14	0.077107	0.460000	Intel-32t-2s	GSTOP_REFINEMENT	19200	1776	25	16.7016	350	1835.15	2.8	0.35	0.35	1372
1104613	40	32	14	0.078359	0.470000	Intel-32t-2s	GUPDATE_REFINEMENT	19200	1189	14	7.52817	350	3378.95	2.8	0.35	0.35	2764
1104613	40	32	14	0.043475	0.450000	Intel-32t-2s	GSTOP_REFINEMENT	19200	1776	25	16.7016	350	1835.15	2.8	0.35	0.35	1372
1104613	40	32	14	0.078058	0.470000	Intel-32t-2s	GUPDATE_REFINEMENT	19200	1189	14	7.52817	350	3378.95	2.8	0.35	0.35	2764
1104613	40	32	14	0.074531	0.480000	Intel-32t-2s	G	19200	1372	12	7.23542	350	3815.7	2.8	0.35	0.35	2912
1104613	40	32	14	0.069184	0.450000	Intel-32t-2s	GUPDATE	19200	1372	13	7.6793	350	3565.5	2.8	0.35	0.35	2736
1104613	40	32	14	0.042017	0.480000	Intel-32t-2s	GSTOP	19200	1875	27	17.1323	350	1941.65	2.8	0.35	0.35	1320
1104613	40	32	14	0.040137	0.450000	Intel-32t-2s	GSTOP_REFINEMENT	19200	1776	25	16.7016	350	1835.15	2.8	0.35	0.35	1372
1104613	40	32	14	0.078794	0.470000	Intel-32t-2s	GUPDATE_REFINEMENT	19200	1189	14	7.52817	350	3378.95	2.8	0.35	0.35	2764
1104613	40	32	14	0.074071	0.460000	Intel-32t-2s	G	19200	1372	12	7.23542	350	3815.7	2.8	0.35	0.35	2912
1104613	40	32	15	0.064995	0.460000	Intel-32t-2s	G	19200	1280	16	8.64844	350	3168.8	2.8	0.35	0.35	2460
1104613	40	32	1	0.276398	5.730000	Intel-32t-2s	GUPDATE	19200	19200	120	92.7583	350	13458.5	2.8	0.35	0.35	624
1104613	40	32	15	0.060830	0.450000	Intel-32t-2s	GUPDATE	19200	1280	24	10.9344	350	2863.65	2.8	0.35	0.35	2220
1104613	40	32	15	0.040015	0.430000	Intel-32t-2s	GSTOP	19200	1370	22	14.1723	350	1614.7	2.8	0.35	0.35	1189
1104613	40	32	15	0.059479	0.440000	Intel-32t-2s	GUPDATE	19200	1280	24	10.9344	350	2863.65	2.8	0.35	0.35	2220
1104613	40	32	15	0.041750	0.420000	Intel-32t-2s	GSTOP	19200	1370	22	14.1723	350	1614.7	2.8	0.35	0.35	1189
1104613	40	32	15	0.046126	0.440000	Intel-32t-2s	GSTOP_REFINEMENT	19200	1348	22	14.8865	350	1596.55	2.8	0.35	0.35	1228
1104613	40	32	15	0.060158	0.450000	Intel-32t-2s	GUPDATE_REFINEMENT	19200	1155	22	10.9524	350	2730.25	2.8	0.35	0.35	2250
1104613	40	32	15	0.045489	0.450000	Intel-32t-2s	GSTOP_REFINEMENT	19200	1348	22	14.8865	350	1596.55	2.8	0.35	0.35	1228
1104613	40	32	15	0.062080	0.440000	Intel-32t-2s	GUPDATE_REFINEMENT	19200	1155	22	10.9524	350	2730.25	2.8	0.35	0.35	2250
1104613	40	32	15	0.062188	0.450000	Intel-32t-2s	G	19200	1280	16	8.64844	350	3168.8	2.8	0.35	0.35	2460
1104613	40	32	15	0.058973	0.430000	Intel-32t-2s	GUPDATE	19200	1280	24	10.9344	350	2863.65	2.8	0.35	0.35	2220
1104613	40	32	15	0.042014	0.430000	Intel-32t-2s	GSTOP	19200	1370	22	14.1723	350	1614.7	2.8	0.35	0.35	1189
1104613	40	32	15	0.047502	0.450000	Intel-32t-2s	GSTOP_REFINEMENT	19200	1348	22	14.8865	350	1596.55	2.8	0.35	0.35	1228
1104613	40	32	15	0.062647	0.440000	Intel-32t-2s	GUPDATE_REFINEMENT	19200	1155	22	10.9524	350	2730.25	2.8	0.35	0.35	2250
1104613	40	32	15	0.062377	0.440000	Intel-32t-2s	G	19200	1280	16	8.64844	350	3168.8	2.8	0.35	0.35	2460
1104613	40	32	16	0.037663	0.450000	Intel-32t-2s	G	19200	1200	30	22.7833	350	1210.2	2.8	0.35	0.35	944
1104613	40	32	1	0.282713	6.370000	Intel-32t-2s	GSTOP	19200	19200	120	92.7583	350	13458.5	2.8	0.35	0.35	624
1104613	40	32	16	0.035052	0.430000	Intel-32t-2s	GUPDATE	19200	1200	30	22.7833	350	1210.9	2.8	0.35	0.35	944
1104613	40	32	16	0.035953	0.420000	Intel-32t-2s	GSTOP	19200	1200	30	22.7833	350	1210.2	2.8	0.35	0.35	944
1104613	40	32	16	0.036083	0.430000	Intel-32t-2s	GUPDATE	19200	1200	30	22.7833	350	1210.9	2.8	0.35	0.35	944
1104613	40	32	16	0.034997	0.430000	Intel-32t-2s	GSTOP	19200	1200	30	22.7833	350	1210.2	2.8	0.35	0.35	944
1104613	40	32	16	0.039377	0.460000	Intel-32t-2s	GSTOP_REFINEMENT	19200	1197	29	22.6967	350	1208.95	2.8	0.35	0.35	960
1104613	40	32	16	0.039699	0.460000	Intel-32t-2s	GUPDATE_REFINEMENT	19200	1197	29	22.6967	350	1209.65	2.8	0.35	0.35	960
1104613	40	32	16	0.038422	0.460000	Intel-32t-2s	GSTOP_REFINEMENT	19200	1197	29	22.6967	350	1208.95	2.8	0.35	0.35	960
1104613	40	32	16	0.038557	0.450000	Intel-32t-2s	GUPDATE_REFINEMENT	19200	1197	29	22.6967	350	1209.65	2.8	0.35	0.35	960
1104613	40	32	16	0.036197	0.430000	Intel-32t-2s	G	19200	1200	30	22.7833	350	1210.2	2.8	0.35	0.35	944
1104613	40	32	16	0.037564	0.430000	Intel-32t-2s	GUPDATE	19200	1200	30	22.7833	350	1210.9	2.8	0.35	0.35	944
1104613	40	32	16	0.035863	0.430000	Intel-32t-2s	GSTOP	19200	1200	30	22.7833	350	1210.2	2.8	0.35	0.35	944
1104613	40	32	16	0.042573	0.470000	Intel-32t-2s	GSTOP_REFINEMENT	19200	1197	29	22.6967	350	1208.95	2.8	0.35	0.35	960
1104613	40	32	16	0.041772	0.490000	Intel-32t-2s	GUPDATE_REFINEMENT	19200	1197	29	22.6967	350	1209.65	2.8	0.35	0.35	960
1104613	40	32	16	0.035051	0.420000	Intel-32t-2s	G	19200	1200	30	22.7833	350	1210.2	2.8	0.35	0.35	944
1104613	40	32	17	0.076608	0.450000	Intel-32t-2s	G	19200	1130	14	7.07345	350	3919.5	2.8	0.35	0.35	3118
1104613	40	32	1	0.109521	2.250000	Intel-32t-2s	GSTOP_REFINEMENT	19200	14161	104	53.9888	350	9933.9	2.8	0.35	0.35	707
1104613	40	32	17	0.075432	0.460000	Intel-32t-2s	GUPDATE	19200	1130	15	7.13894	350	3791.8	2.8	0.35	0.35	3033
1104613	40	32	17	0.052610	0.440000	Intel-32t-2s	GSTOP	19200	1637	18	12.0507	350	2550.85	2.8	0.35	0.35	1961
1104613	40	32	17	0.076262	0.460000	Intel-32t-2s	GUPDATE	19200	1130	15	7.13894	350	3791.8	2.8	0.35	0.35	3033
1104613	40	32	17	0.054154	0.440000	Intel-32t-2s	GSTOP	19200	1637	18	12.0507	350	2550.85	2.8	0.35	0.35	1961
1104613	40	32	17	0.054657	0.440000	Intel-32t-2s	GSTOP_REFINEMENT	19200	1556	18	11.9704	350	2483.9	2.8	0.35	0.35	1972
1104613	40	32	17	0.077552	0.450000	Intel-32t-2s	GUPDATE_REFINEMENT	19200	960	14	6.99792	350	3592.15	2.8	0.35	0.35	3050
1104613	40	32	17	0.054288	0.440000	Intel-32t-2s	GSTOP_REFINEMENT	19200	1556	18	11.9704	350	2483.9	2.8	0.35	0.35	1972
1104613	40	32	17	0.077634	0.450000	Intel-32t-2s	GUPDATE_REFINEMENT	19200	960	14	6.99792	350	3592.15	2.8	0.35	0.35	3050
1104613	40	32	17	0.078662	0.460000	Intel-32t-2s	G	19200	1130	14	7.07345	350	3919.5	2.8	0.35	0.35	3118
1104613	40	32	17	0.075085	0.450000	Intel-32t-2s	GUPDATE	19200	1130	15	7.13894	350	3791.8	2.8	0.35	0.35	3033
1104613	40	32	17	0.053627	0.440000	Intel-32t-2s	GSTOP	19200	1637	18	12.0507	350	2550.85	2.8	0.35	0.35	1961
1104613	40	32	17	0.057236	0.470000	Intel-32t-2s	GSTOP_REFINEMENT	19200	1556	18	11.9704	350	2483.9	2.8	0.35	0.35	1972
1104613	40	32	17	0.077150	0.440000	Intel-32t-2s	GUPDATE_REFINEMENT	19200	960	14	6.99792	350	3592.15	2.8	0.35	0.35	3050
1104613	40	32	17	0.078635	0.450000	Intel-32t-2s	G	19200	1130	14	7.07345	350	3919.5	2.8	0.35	0.35	3118
1104613	40	32	18	0.080772	0.460000	Intel-32t-2s	G	19200	1067	12	6.38051	350	4121.65	2.8	0.35	0.35	3324
1104613	40	32	1	0.185941	3.720000	Intel-32t-2s	GUPDATE_REFINEMENT	19200	14193	90	52.3682	350	9956.5	2.8	0.35	0.35	722
1104613	40	32	18	0.079400	0.460000	Intel-32t-2s	GUPDATE	19200	1067	12	6.59138	350	4027.1	2.8	0.35	0.35	3234
1104613	40	32	18	0.041903	0.430000	Intel-32t-2s	GSTOP	19200	1368	19	14.6667	350	1838.8	2.8	0.35	0.35	1400
1104613	40	32	18	0.080109	0.460000	Intel-32t-2s	GUPDATE	19200	1067	12	6.59138	350	4027.1	2.8	0.35	0.35	3234
1104613	40	32	18	0.043969	0.430000	Intel-32t-2s	GSTOP	19200	1368	19	14.6667	350	1838.8	2.8	0.35	0.35	1400
1104613	40	32	18	0.043935	0.430000	Intel-32t-2s	GSTOP_REFINEMENT	19200	1339	19	14.9141	350	1786.4	2.8	0.35	0.35	1410
1104613	40	32	18	0.082532	0.460000	Intel-32t-2s	GUPDATE_REFINEMENT	19200	891	14	6.30527	350	3819.9	2.8	0.35	0.35	3252
1104613	40	32	18	0.049241	0.450000	Intel-32t-2s	GSTOP_REFINEMENT	19200	1339	19	14.9141	350	1786.4	2.8	0.35	0.35	1410
1104613	40	32	18	0.082201	0.460000	Intel-32t-2s	GUPDATE_REFINEMENT	19200	891	14	6.30527	350	3819.9	2.8	0.35	0.35	3252
1104613	40	32	18	0.082015	0.450000	Intel-32t-2s	G	19200	1067	12	6.38051	350	4121.65	2.8	0.35	0.35	3324
1104613	40	32	18	0.080717	0.460000	Intel-32t-2s	GUPDATE	19200	1067	12	6.59138	350	4027.1	2.8	0.35	0.35	3234
1104613	40	32	18	0.043988	0.440000	Intel-32t-2s	GSTOP	19200	1368	19	14.6667	350	1838.8	2.8	0.35	0.35	1400
1104613	40	32	18	0.049538	0.450000	Intel-32t-2s	GSTOP_REFINEMENT	19200	1339	19	14.9141	350	1786.4	2.8	0.35	0.35	1410
1104613	40	32	18	0.083666	0.460000	Intel-32t-2s	GUPDATE_REFINEMENT	19200	891	14	6.30527	350	3819.9	2.8	0.35	0.35	3252
1104613	40	32	18	0.080513	0.460000	Intel-32t-2s	G	19200	1067	12	6.38051	350	4121.65	2.8	0.35	0.35	3324
1104613	40	32	19	0.081515	0.450000	Intel-32t-2s	G	19200	1011	13	6.37685	350	4070.6	2.8	0.35	0.35	3316
1104613	40	32	1	0.159727	3.440000	Intel-32t-2s	G	19200	19200	120	92.7583	350	13458.5	2.8	0.35	0.35	624
1104613	40	32	19	0.075396	0.450000	Intel-32t-2s	GUPDATE	19200	1011	14	6.8457	350	3737.4	2.8	0.35	0.35	3050
1104613	40	32	19	0.046553	0.440000	Intel-32t-2s	GSTOP	19200	1473	22	15.3999	350	1935.95	2.8	0.35	0.35	1484
1104613	40	32	19	0.075575	0.450000	Intel-32t-2s	GUPDATE	19200	1011	14	6.8457	350	3737.4	2.8	0.35	0.35	3050
1104613	40	32	19	0.048243	0.450000	Intel-32t-2s	GSTOP	19200	1473	22	15.3999	350	1935.95	2.8	0.35	0.35	1484
1104613	40	32	19	0.055182	0.470000	Intel-32t-2s	GSTOP_REFINEMENT	19200	1428	21	15.1975	350	1915.25	2.8	0.35	0.35	1511
1104613	40	32	19	0.078368	0.450000	Intel-32t-2s	GUPDATE_REFINEMENT	19200	872	14	7.01261	350	3557.85	2.8	0.35	0.35	3050
1104613	40	32	19	0.052253	0.460000	Intel-32t-2s	GSTOP_REFINEMENT	19200	1428	21	15.1975	350	1915.25	2.8	0.35	0.35	1511
1104613	40	32	19	0.074981	0.440000	Intel-32t-2s	GUPDATE_REFINEMENT	19200	872	14	7.01261	350	3557.85	2.8	0.35	0.35	3050
1104613	40	32	19	0.080752	0.450000	Intel-32t-2s	G	19200	1011	13	6.37685	350	4070.6	2.8	0.35	0.35	3316
1104613	40	32	19	0.075673	0.450000	Intel-32t-2s	GUPDATE	19200	1011	14	6.8457	350	3737.4	2.8	0.35	0.35	3050
1104613	40	32	19	0.048674	0.480000	Intel-32t-2s	GSTOP	19200	1473	22	15.3999	350	1935.95	2.8	0.35	0.35	1484
1104613	40	32	19	0.054199	0.460000	Intel-32t-2s	GSTOP_REFINEMENT	19200	1428	21	15.1975	350	1915.25	2.8	0.35	0.35	1511
1104613	40	32	19	0.075725	0.450000	Intel-32t-2s	GUPDATE_REFINEMENT	19200	872	14	7.01261	350	3557.85	2.8	0.35	0.35	3050
1104613	40	32	19	0.081122	0.450000	Intel-32t-2s	G	19200	1011	13	6.37685	350	4070.6	2.8	0.35	0.35	3316
1104613	40	32	2	0.109760	2.330000	Intel-32t-2s	G	19200	9600	70	49.8749	350	6762.4	2.8	0.35	0.35	654
1104613	40	32	20	0.037962	0.430000	Intel-32t-2s	G	19200	960	25	18.5177	350	1383.25	2.8	0.35	0.35	1140
1104613	40	32	2	0.124875	2.420000	Intel-32t-2s	GUPDATE	19200	9600	70	49.8749	350	6762.4	2.8	0.35	0.35	654
1104613	40	32	20	0.040664	0.430000	Intel-32t-2s	GUPDATE	19200	960	25	18.5177	350	1383.25	2.8	0.35	0.35	1140
1104613	40	32	20	0.040153	0.420000	Intel-32t-2s	GSTOP	19200	960	25	18.5177	350	1383.25	2.8	0.35	0.35	1140
1104613	40	32	20	0.039193	0.420000	Intel-32t-2s	GUPDATE	19200	960	25	18.5177	350	1383.25	2.8	0.35	0.35	1140
1104613	40	32	20	0.037291	0.420000	Intel-32t-2s	GSTOP	19200	960	25	18.5177	350	1383.25	2.8	0.35	0.35	1140
1104613	40	32	20	0.041531	0.420000	Intel-32t-2s	GSTOP_REFINEMENT	19200	955	25	18.599	350	1371.3	2.8	0.35	0.35	1140
1104613	40	32	20	0.048724	0.450000	Intel-32t-2s	GUPDATE_REFINEMENT	19200	955	25	18.599	350	1371.3	2.8	0.35	0.35	1140
1104613	40	32	20	0.041716	0.410000	Intel-32t-2s	GSTOP_REFINEMENT	19200	955	25	18.599	350	1371.3	2.8	0.35	0.35	1140
1104613	40	32	20	0.037321	0.420000	Intel-32t-2s	GUPDATE_REFINEMENT	19200	955	25	18.599	350	1371.3	2.8	0.35	0.35	1140
1104613	40	32	20	0.038167	0.420000	Intel-32t-2s	G	19200	960	25	18.5177	350	1383.25	2.8	0.35	0.35	1140
1104613	40	32	20	0.038150	0.420000	Intel-32t-2s	GUPDATE	19200	960	25	18.5177	350	1383.25	2.8	0.35	0.35	1140
1104613	40	32	20	0.037935	0.420000	Intel-32t-2s	GSTOP	19200	960	25	18.5177	350	1383.25	2.8	0.35	0.35	1140
1104613	40	32	20	0.039381	0.430000	Intel-32t-2s	GSTOP_REFINEMENT	19200	955	25	18.599	350	1371.3	2.8	0.35	0.35	1140
1104613	40	32	20	0.038017	0.420000	Intel-32t-2s	GUPDATE_REFINEMENT	19200	955	25	18.599	350	1371.3	2.8	0.35	0.35	1140
1104613	40	32	20	0.038134	0.420000	Intel-32t-2s	G	19200	960	25	18.5177	350	1383.25	2.8	0.35	0.35	1140
1104613	40	32	21	0.080916	0.460000	Intel-32t-2s	G	19200	915	12	6.42404	350	4099.25	2.8	0.35	0.35	3387
1104613	40	32	2	0.133606	2.870000	Intel-32t-2s	GSTOP	19200	9600	70	49.8749	350	6762.4	2.8	0.35	0.35	654
1104613	40	32	2	0.120480	2.240000	Intel-32t-2s	GUPDATE	19200	9600	70	49.8749	350	6762.4	2.8	0.35	0.35	654
1104613	40	32	21	0.082124	0.440000	Intel-32t-2s	GUPDATE	19200	915	11	6.32568	350	4143.7	2.8	0.35	0.35	3450
1104613	40	32	2	0.123237	2.440000	Intel-32t-2s	GSTOP	19200	9600	70	49.8749	350	6762.4	2.8	0.35	0.35	654
1104613	40	32	21	0.057868	0.430000	Intel-32t-2s	GSTOP	19200	1176	14	9.47449	350	2724.4	2.8	0.35	0.35	2223
1104613	40	32	21	0.081582	0.450000	Intel-32t-2s	GUPDATE	19200	915	11	6.32568	350	4143.7	2.8	0.35	0.35	3450
1104613	40	32	21	0.057438	0.420000	Intel-32t-2s	GSTOP	19200	1176	14	9.47449	350	2724.4	2.8	0.35	0.35	2223
1104613	40	32	21	0.060203	0.420000	Intel-32t-2s	GSTOP_REFINEMENT	19200	1114	13	9.40036	350	2673	2.8	0.35	0.35	2226
1104613	40	32	21	0.083213	0.450000	Intel-32t-2s	GUPDATE_REFINEMENT	19200	760	12	6.21974	350	3948.75	2.8	0.35	0.35	3450
1104613	40	32	2	0.066649	1.140000	Intel-32t-2s	GSTOP_REFINEMENT	19200	6841	57	33.9421	350	4822.25	2.8	0.35	0.35	914
1104613	40	32	21	0.057459	0.430000	Intel-32t-2s	GSTOP_REFINEMENT	19200	1114	13	9.40036	350	2673	2.8	0.35	0.35	2226
1104613	40	32	2	0.092685	1.880000	Intel-32t-2s	GUPDATE_REFINEMENT	19200	7726	56	38.5177	350	5439.9	2.8	0.35	0.35	826
1104613	40	32	21	0.082870	0.450000	Intel-32t-2s	GUPDATE_REFINEMENT	19200	760	12	6.21974	350	3948.75	2.8	0.35	0.35	3450
1104613	40	32	21	0.080623	0.450000	Intel-32t-2s	G	19200	915	12	6.42404	350	4099.25	2.8	0.35	0.35	3387
1104613	40	32	21	0.082080	0.450000	Intel-32t-2s	GUPDATE	19200	915	11	6.32568	350	4143.7	2.8	0.35	0.35	3450
1104613	40	32	21	0.058064	0.430000	Intel-32t-2s	GSTOP	19200	1176	14	9.47449	350	2724.4	2.8	0.35	0.35	2223
1104613	40	32	21	0.062942	0.450000	Intel-32t-2s	GSTOP_REFINEMENT	19200	1114	13	9.40036	350	2673	2.8	0.35	0.35	2226
1104613	40	32	21	0.082984	0.440000	Intel-32t-2s	GUPDATE_REFINEMENT	19200	760	12	6.21974	350	3948.75	2.8	0.35	0.35	3450
1104613	40	32	21	0.080421	0.450000	Intel-32t-2s	G	19200	915	12	6.42404	350	4099.25	2.8	0.35	0.35	3387
1104613	40	32	22	0.093501	0.460000	Intel-32t-2s	G	19200	873	11	5.50974	350	4703.75	2.8	0.35	0.35	3932
1104613	40	32	2	0.047069	0.730000	Intel-32t-2s	GSTOP_REFINEMENT	19200	6841	57	33.9421	350	4822.25	2.8	0.35	0.35	914
1104613	40	32	22	0.091346	0.460000	Intel-32t-2s	GUPDATE	19200	873	11	5.57961	350	4617.1	2.8	0.35	0.35	3866
1104613	40	32	22	0.051647	0.450000	Intel-32t-2s	GSTOP	19200	1369	18	13.1812	350	2270	2.8	0.35	0.35	1830
1104613	40	32	22	0.092181	0.460000	Intel-32t-2s	GUPDATE	19200	873	11	5.57961	350	4617.1	2.8	0.35	0.35	3866
1104613	40	32	22	0.048411	0.430000	Intel-32t-2s	GSTOP	19200	1369	18	13.1812	350	2270	2.8	0.35	0.35	1830
1104613	40	32	22	0.051865	0.460000	Intel-32t-2s	GSTOP_REFINEMENT	19200	1279	18	12.3542	350	2216.15	2.8	0.35	0.35	1836
1104613	40	32	22	0.100761	0.480000	Intel-32t-2s	GUPDATE_REFINEMENT	19200	716	10	5.35335	350	4409.9	2.8	0.35	0.35	3866
1104613	40	32	22	0.053239	0.460000	Intel-32t-2s	GSTOP_REFINEMENT	19200	1279	18	12.3542	350	2216.15	2.8	0.35	0.35	1836
1104613	40	32	22	0.094257	0.460000	Intel-32t-2s	GUPDATE_REFINEMENT	19200	716	10	5.35335	350	4409.9	2.8	0.35	0.35	3866
1104613	40	32	22	0.092706	0.460000	Intel-32t-2s	G	19200	873	11	5.50974	350	4703.75	2.8	0.35	0.35	3932
1104613	40	32	22	0.090689	0.470000	Intel-32t-2s	GUPDATE	19200	873	11	5.57961	350	4617.1	2.8	0.35	0.35	3866
1104613	40	32	22	0.051233	0.440000	Intel-32t-2s	GSTOP	19200	1369	18	13.1812	350	2270	2.8	0.35	0.35	1830
1104613	40	32	22	0.053108	0.430000	Intel-32t-2s	GSTOP_REFINEMENT	19200	1279	18	12.3542	350	2216.15	2.8	0.35	0.35	1836
1104613	40	32	22	0.092708	0.450000	Intel-32t-2s	GUPDATE_REFINEMENT	19200	716	10	5.35335	350	4409.9	2.8	0.35	0.35	3866
1104613	40	32	22	0.093133	0.470000	Intel-32t-2s	G	19200	873	11	5.50974	350	4703.75	2.8	0.35	0.35	3932
1104613	40	32	23	0.095286	0.470000	Intel-32t-2s	G	19200	835	11	5.29701	350	4824.1	2.8	0.35	0.35	4066
1104613	40	32	2	0.061997	1.100000	Intel-32t-2s	GUPDATE_REFINEMENT	19200	7726	56	38.5177	350	5439.9	2.8	0.35	0.35	826
1104613	40	32	23	0.094699	0.470000	Intel-32t-2s	GUPDATE	19200	835	10	5.30659	350	4700.1	2.8	0.35	0.35	3956
1104613	40	32	23	0.048960	0.440000	Intel-32t-2s	GSTOP	19200	1129	20	12.8999	350	2232.9	2.8	0.35	0.35	1832
1104613	40	32	23	0.093549	0.460000	Intel-32t-2s	GUPDATE	19200	835	10	5.30659	350	4700.1	2.8	0.35	0.35	3956
1104613	40	32	23	0.049431	0.430000	Intel-32t-2s	GSTOP	19200	1129	20	12.8999	350	2232.9	2.8	0.35	0.35	1832
1104613	40	32	23	0.051513	0.440000	Intel-32t-2s	GSTOP_REFINEMENT	19200	1071	20	12.2988	350	2189.15	2.8	0.35	0.35	1844
1104613	40	32	23	0.097010	0.470000	Intel-32t-2s	GUPDATE_REFINEMENT	19200	685	11	5.47007	350	4476.8	2.8	0.35	0.35	3956
1104613	40	32	23	0.051290	0.420000	Intel-32t-2s	GSTOP_REFINEMENT	19200	1071	20	12.2988	350	2189.15	2.8	0.35	0.35	1844
1104613	40	32	23	0.095584	0.450000	Intel-32t-2s	GUPDATE_REFINEMENT	19200	685	11	5.47007	350	4476.8	2.8	0.35	0.35	3956
1104613	40	32	23	0.095987	0.470000	Intel-32t-2s	G	19200	835	11	5.29701	350	4824.1	2.8	0.35	0.35	4066
1104613	40	32	23	0.091390	0.460000	Intel-32t-2s	GUPDATE	19200	835	10	5.30659	350	4700.1	2.8	0.35	0.35	3956
1104613	40	32	23	0.050704	0.430000	Intel-32t-2s	GSTOP	19200	1129	20	12.8999	350	2232.9	2.8	0.35	0.35	1832
1104613	40	32	23	0.051025	0.430000	Intel-32t-2s	GSTOP_REFINEMENT	19200	1071	20	12.2988	350	2189.15	2.8	0.35	0.35	1844
1104613	40	32	23	0.097443	0.470000	Intel-32t-2s	GUPDATE_REFINEMENT	19200	685	11	5.47007	350	4476.8	2.8	0.35	0.35	3956
1104613	40	32	23	0.094411	0.460000	Intel-32t-2s	G	19200	835	11	5.29701	350	4824.1	2.8	0.35	0.35	4066
1104613	40	32	24	0.077843	0.440000	Intel-32t-2s	G	19200	800	12	6.59625	350	3901.9	2.8	0.35	0.35	3288
1104613	40	32	2	0.130531	2.580000	Intel-32t-2s	G	19200	9600	70	49.8749	350	6762.4	2.8	0.35	0.35	654
1104613	40	32	24	0.078436	0.450000	Intel-32t-2s	GUPDATE	19200	800	13	6.81125	350	3689.1	2.8	0.35	0.35	3120
1104613	40	32	24	0.045918	0.420000	Intel-32t-2s	GSTOP	19200	852	18	11.6138	350	1892.75	2.8	0.35	0.35	1568
1104613	40	32	24	0.075327	0.450000	Intel-32t-2s	GUPDATE	19200	800	13	6.81125	350	3689.1	2.8	0.35	0.35	3120
1104613	40	32	24	0.046720	0.430000	Intel-32t-2s	GSTOP	19200	852	18	11.6138	350	1892.75	2.8	0.35	0.35	1568
1104613	40	32	24	0.047912	0.430000	Intel-32t-2s	GSTOP_REFINEMENT	19200	821	17	12.3459	350	1868.8	2.8	0.35	0.35	1612
1104613	40	32	24	0.075968	0.450000	Intel-32t-2s	GUPDATE_REFINEMENT	19200	701	12	6.77175	350	3555.05	2.8	0.35	0.35	3120
1104613	40	32	24	0.049269	0.430000	Intel-32t-2s	GSTOP_REFINEMENT	19200	821	17	12.3459	350	1868.8	2.8	0.35	0.35	1612
1104613	40	32	24	0.076378	0.440000	Intel-32t-2s	GUPDATE_REFINEMENT	19200	701	12	6.77175	350	3555.05	2.8	0.35	0.35	3120
1104613	40	32	24	0.078632	0.450000	Intel-32t-2s	G	19200	800	12	6.59625	350	3901.9	2.8	0.35	0.35	3288
1104613	40	32	24	0.075966	0.450000	Intel-32t-2s	GUPDATE	19200	800	13	6.81125	350	3689.1	2.8	0.35	0.35	3120
1104613	40	32	24	0.044228	0.420000	Intel-32t-2s	GSTOP	19200	852	18	11.6138	350	1892.75	2.8	0.35	0.35	1568
1104613	40	32	24	0.047531	0.420000	Intel-32t-2s	GSTOP_REFINEMENT	19200	821	17	12.3459	350	1868.8	2.8	0.35	0.35	1612
1104613	40	32	24	0.079390	0.440000	Intel-32t-2s	GUPDATE_REFINEMENT	19200	701	12	6.77175	350	3555.05	2.8	0.35	0.35	3120
1104613	40	32	24	0.077438	0.450000	Intel-32t-2s	G	19200	800	12	6.59625	350	3901.9	2.8	0.35	0.35	3288
1104613	40	32	25	0.041348	0.430000	Intel-32t-2s	G	19200	768	24	18.125	350	1386.4	2.8	0.35	0.35	1175
1104613	40	32	2	0.125422	2.430000	Intel-32t-2s	GUPDATE	19200	9600	70	49.8749	350	6762.4	2.8	0.35	0.35	654
1104613	40	32	25	0.038766	0.430000	Intel-32t-2s	GUPDATE	19200	768	24	18.125	350	1387.1	2.8	0.35	0.35	1175
1104613	40	32	25	0.041238	0.420000	Intel-32t-2s	GSTOP	19200	768	24	18.125	350	1386.4	2.8	0.35	0.35	1175
1104613	40	32	25	0.041636	0.420000	Intel-32t-2s	GUPDATE	19200	768	24	18.125	350	1387.1	2.8	0.35	0.35	1175
1104613	40	32	25	0.040580	0.430000	Intel-32t-2s	GSTOP	19200	768	24	18.125	350	1386.4	2.8	0.35	0.35	1175
1104613	40	32	25	0.041136	0.430000	Intel-32t-2s	GSTOP_REFINEMENT	19200	768	24	18.125	350	1386.4	2.8	0.35	0.35	1175
1104613	40	32	25	0.041949	0.430000	Intel-32t-2s	GUPDATE_REFINEMENT	19200	768	24	18.125	350	1387.1	2.8	0.35	0.35	1175
1104613	40	32	25	0.043663	0.420000	Intel-32t-2s	GSTOP_REFINEMENT	19200	768	24	18.125	350	1386.4	2.8	0.35	0.35	1175
1104613	40	32	25	0.042136	0.430000	Intel-32t-2s	GUPDATE_REFINEMENT	19200	768	24	18.125	350	1387.1	2.8	0.35	0.35	1175
1104613	40	32	25	0.038852	0.420000	Intel-32t-2s	G	19200	768	24	18.125	350	1386.4	2.8	0.35	0.35	1175
1104613	40	32	25	0.040012	0.420000	Intel-32t-2s	GUPDATE	19200	768	24	18.125	350	1387.1	2.8	0.35	0.35	1175
1104613	40	32	25	0.039627	0.420000	Intel-32t-2s	GSTOP	19200	768	24	18.125	350	1386.4	2.8	0.35	0.35	1175
1104613	40	32	25	0.042063	0.440000	Intel-32t-2s	GSTOP_REFINEMENT	19200	768	24	18.125	350	1386.4	2.8	0.35	0.35	1175
1104613	40	32	25	0.042125	0.420000	Intel-32t-2s	GUPDATE_REFINEMENT	19200	768	24	18.125	350	1387.1	2.8	0.35	0.35	1175
1104613	40	32	25	0.041236	0.420000	Intel-32t-2s	G	19200	768	24	18.125	350	1386.4	2.8	0.35	0.35	1175
1104613	40	32	26	0.102021	0.470000	Intel-32t-2s	G	19200	739	9	4.81867	350	5023.7	2.8	0.35	0.35	4302
1104613	40	32	2	0.050949	0.950000	Intel-32t-2s	GSTOP	19200	9600	70	49.8749	350	6762.4	2.8	0.35	0.35	654
1104613	40	32	26	0.090801	0.450000	Intel-32t-2s	GUPDATE	19200	739	10	5.51827	350	4640.3	2.8	0.35	0.35	3990
1104613	40	32	26	0.060748	0.440000	Intel-32t-2s	GSTOP	19200	1112	15	10.205	350	2832.35	2.8	0.35	0.35	2380
1104613	40	32	26	0.091012	0.450000	Intel-32t-2s	GUPDATE	19200	739	10	5.51827	350	4640.3	2.8	0.35	0.35	3990
1104613	40	32	26	0.061399	0.440000	Intel-32t-2s	GSTOP	19200	1112	15	10.205	350	2832.35	2.8	0.35	0.35	2380
1104613	40	32	26	0.061854	0.440000	Intel-32t-2s	GSTOP_REFINEMENT	19200	1067	15	10.1078	350	2796.5	2.8	0.35	0.35	2394
1104613	40	32	26	0.095386	0.460000	Intel-32t-2s	GUPDATE_REFINEMENT	19200	607	10	5.40527	350	4459.35	2.8	0.35	0.35	3990
1104613	40	32	26	0.066561	0.440000	Intel-32t-2s	GSTOP_REFINEMENT	19200	1067	15	10.1078	350	2796.5	2.8	0.35	0.35	2394
1104613	40	32	26	0.095653	0.450000	Intel-32t-2s	GUPDATE_REFINEMENT	19200	607	10	5.40527	350	4459.35	2.8	0.35	0.35	3990
1104613	40	32	26	0.101101	0.460000	Intel-32t-2s	G	19200	739	9	4.81867	350	5023.7	2.8	0.35	0.35	4302
1104613	40	32	26	0.092266	0.450000	Intel-32t-2s	GUPDATE	19200	739	10	5.51827	350	4640.3	2.8	0.35	0.35	3990
1104613	40	32	26	0.062482	0.440000	Intel-32t-2s	GSTOP	19200	1112	15	10.205	350	2832.35	2.8	0.35	0.35	2380
1104613	40	32	26	0.064628	0.440000	Intel-32t-2s	GSTOP_REFINEMENT	19200	1067	15	10.1078	350	2796.5	2.8	0.35	0.35	2394
1104613	40	32	26	0.095039	0.460000	Intel-32t-2s	GUPDATE_REFINEMENT	19200	607	10	5.40527	350	4459.35	2.8	0.35	0.35	3990
1104613	40	32	26	0.099855	0.460000	Intel-32t-2s	G	19200	739	9	4.81867	350	5023.7	2.8	0.35	0.35	4302
1104613	40	32	27	0.101021	0.470000	Intel-32t-2s	G	19200	712	11	4.95084	350	5012.5	2.8	0.35	0.35	4323
1104613	40	32	2	0.091102	1.720000	Intel-32t-2s	GSTOP_REFINEMENT	19200	6841	57	33.9421	350	4822.25	2.8	0.35	0.35	914
1104613	40	32	27	0.103304	0.470000	Intel-32t-2s	GUPDATE	19200	712	11	4.78652	350	5163.25	2.8	0.35	0.35	4458
1104613	40	32	27	0.056302	0.440000	Intel-32t-2s	GSTOP	19200	1066	17	11.3987	350	2465.35	2.8	0.35	0.35	2069
1104613	40	32	27	0.101997	0.460000	Intel-32t-2s	GUPDATE	19200	712	11	4.78652	350	5163.25	2.8	0.35	0.35	4458
1104613	40	32	27	0.054109	0.440000	Intel-32t-2s	GSTOP	19200	1066	17	11.3987	350	2465.35	2.8	0.35	0.35	2069
1104613	40	32	27	0.055739	0.430000	Intel-32t-2s	GSTOP_REFINEMENT	19200	996	16	10.9177	350	2412.65	2.8	0.35	0.35	2069
1104613	40	32	27	0.105715	0.470000	Intel-32t-2s	GUPDATE_REFINEMENT	19200	588	9	4.59014	350	4986.15	2.8	0.35	0.35	4458
1104613	40	32	27	0.056236	0.420000	Intel-32t-2s	GSTOP_REFINEMENT	19200	996	16	10.9177	350	2412.65	2.8	0.35	0.35	2069
1104613	40	32	27	0.105313	0.460000	Intel-32t-2s	GUPDATE_REFINEMENT	19200	588	9	4.59014	350	4986.15	2.8	0.35	0.35	4458
1104613	40	32	27	0.100156	0.460000	Intel-32t-2s	G	19200	712	11	4.95084	350	5012.5	2.8	0.35	0.35	4323
1104613	40	32	27	0.102724	0.460000	Intel-32t-2s	GUPDATE	19200	712	11	4.78652	350	5163.25	2.8	0.35	0.35	4458
1104613	40	32	27	0.054787	0.430000	Intel-32t-2s	GSTOP	19200	1066	17	11.3987	350	2465.35	2.8	0.35	0.35	2069
1104613	40	32	27	0.057311	0.440000	Intel-32t-2s	GSTOP_REFINEMENT	19200	996	16	10.9177	350	2412.65	2.8	0.35	0.35	2069
1104613	40	32	27	0.104678	0.470000	Intel-32t-2s	GUPDATE_REFINEMENT	19200	588	9	4.59014	350	4986.15	2.8	0.35	0.35	4458
1104613	40	32	27	0.100486	0.470000	Intel-32t-2s	G	19200	712	11	4.95084	350	5012.5	2.8	0.35	0.35	4323
1104613	40	32	28	0.098917	0.480000	Intel-32t-2s	G	19200	686	9	4.8105	350	5053	2.8	0.35	0.35	4388
1104613	40	32	2	0.088072	1.750000	Intel-32t-2s	GUPDATE_REFINEMENT	19200	7726	56	38.5177	350	5439.9	2.8	0.35	0.35	826
1104613	40	32	28	0.093541	0.460000	Intel-32t-2s	GUPDATE	19200	686	9	5.25364	350	4741.85	2.8	0.35	0.35	4108
1104613	40	32	28	0.054675	0.420000	Intel-32t-2s	GSTOP	19200	912	16	11.3103	350	2374.95	2.8	0.35	0.35	2023
1104613	40	32	28	0.093976	0.450000	Intel-32t-2s	GUPDATE	19200	686	9	5.25364	350	4741.85	2.8	0.35	0.35	4108
1104613	40	32	28	0.053614	0.420000	Intel-32t-2s	GSTOP	19200	912	16	11.3103	350	2374.95	2.8	0.35	0.35	2023
1104613	40	32	28	0.055669	0.430000	Intel-32t-2s	GSTOP_REFINEMENT	19200	878	16	11.1105	350	2345.65	2.8	0.35	0.35	2029
1104613	40	32	28	0.097070	0.450000	Intel-32t-2s	GUPDATE_REFINEMENT	19200	567	10	5.06878	350	4561.95	2.8	0.35	0.35	4136
1104613	40	32	28	0.052811	0.430000	Intel-32t-2s	GSTOP_REFINEMENT	19200	878	16	11.1105	350	2345.65	2.8	0.35	0.35	2029
1104613	40	32	28	0.095687	0.460000	Intel-32t-2s	GUPDATE_REFINEMENT	19200	567	10	5.06878	350	4561.95	2.8	0.35	0.35	4136
1104613	40	32	28	0.099646	0.460000	Intel-32t-2s	G	19200	686	9	4.8105	350	5053	2.8	0.35	0.35	4388
1104613	40	32	28	0.094482	0.460000	Intel-32t-2s	GUPDATE	19200	686	9	5.25364	350	4741.85	2.8	0.35	0.35	4108
1104613	40	32	28	0.053683	0.420000	Intel-32t-2s	GSTOP	19200	912	16	11.3103	350	2374.95	2.8	0.35	0.35	2023
1104613	40	32	28	0.055763	0.420000	Intel-32t-2s	GSTOP_REFINEMENT	19200	878	16	11.1105	350	2345.65	2.8	0.35	0.35	2029
1104613	40	32	28	0.095939	0.460000	Intel-32t-2s	GUPDATE_REFINEMENT	19200	567	10	5.06878	350	4561.95	2.8	0.35	0.35	4136
1104613	40	32	28	0.098456	0.460000	Intel-32t-2s	G	19200	686	9	4.8105	350	5053	2.8	0.35	0.35	4388
1104613	40	32	29	0.099547	0.460000	Intel-32t-2s	G	19200	663	8	4.727	350	4961.4	2.8	0.35	0.35	4323
1104613	40	32	2	0.050470	0.940000	Intel-32t-2s	G	19200	9600	70	49.8749	350	6762.4	2.8	0.35	0.35	654
1104613	40	32	29	0.091611	0.470000	Intel-32t-2s	GUPDATE	19200	663	10	5.546	350	4541	2.8	0.35	0.35	3946
1104613	40	32	29	0.050491	0.430000	Intel-32t-2s	GSTOP	19200	953	18	11.3064	350	2212.35	2.8	0.35	0.35	1864
1104613	40	32	29	0.091538	0.460000	Intel-32t-2s	GUPDATE	19200	663	10	5.546	350	4541	2.8	0.35	0.35	3946
1104613	40	32	29	0.051225	0.440000	Intel-32t-2s	GSTOP	19200	953	18	11.3064	350	2212.35	2.8	0.35	0.35	1864
1104613	40	32	29	0.058617	0.450000	Intel-32t-2s	GSTOP_REFINEMENT	19200	908	16	11.2885	350	2178.3	2.8	0.35	0.35	1885
1104613	40	32	29	0.094358	0.440000	Intel-32t-2s	GUPDATE_REFINEMENT	19200	547	11	5.16088	350	4401.35	2.8	0.35	0.35	3946
1104613	40	32	29	0.056356	0.450000	Intel-32t-2s	GSTOP_REFINEMENT	19200	908	16	11.2885	350	2178.3	2.8	0.35	0.35	1885
1104613	40	32	29	0.093614	0.460000	Intel-32t-2s	GUPDATE_REFINEMENT	19200	547	11	5.16088	350	4401.35	2.8	0.35	0.35	3946
1104613	40	32	29	0.100205	0.460000	Intel-32t-2s	G	19200	663	8	4.727	350	4961.4	2.8	0.35	0.35	4323
1104613	40	32	29	0.092176	0.450000	Intel-32t-2s	GUPDATE	19200	663	10	5.546	350	4541	2.8	0.35	0.35	3946
1104613	40	32	29	0.053919	0.430000	Intel-32t-2s	GSTOP	19200	953	18	11.3064	350	2212.35	2.8	0.35	0.35	1864
1104613	40	32	29	0.052760	0.420000	Intel-32t-2s	GSTOP_REFINEMENT	19200	908	16	11.2885	350	2178.3	2.8	0.35	0.35	1885
1104613	40	32	29	0.095295	0.460000	Intel-32t-2s	GUPDATE_REFINEMENT	19200	547	11	5.16088	350	4401.35	2.8	0.35	0.35	3946
1104613	40	32	29	0.099626	0.460000	Intel-32t-2s	G	19200	663	8	4.727	350	4961.4	2.8	0.35	0.35	4323
1104613	40	32	3	0.055103	0.560000	Intel-32t-2s	G	19200	6400	28	15.6781	350	4755.35	2.8	0.35	0.35	1407
1104613	40	32	30	0.082546	0.450000	Intel-32t-2s	G	19200	640	13	6.76719	350	3953.3	2.8	0.35	0.35	3450
1104613	40	32	3	0.049995	0.610000	Intel-32t-2s	GUPDATE	19200	6400	31	20.1194	350	4694.3	2.8	0.35	0.35	1110
1104613	40	32	30	0.074906	0.440000	Intel-32t-2s	GUPDATE	19200	640	13	6.97031	350	3681.1	2.8	0.35	0.35	3210
1104613	40	32	30	0.047609	0.430000	Intel-32t-2s	GSTOP	19200	673	19	13.2437	350	1827.1	2.8	0.35	0.35	1603
1104613	40	32	30	0.078000	0.460000	Intel-32t-2s	GUPDATE	19200	640	13	6.97031	350	3681.1	2.8	0.35	0.35	3210
1104613	40	32	30	0.047390	0.420000	Intel-32t-2s	GSTOP	19200	673	19	13.2437	350	1827.1	2.8	0.35	0.35	1603
1104613	40	32	30	0.046358	0.430000	Intel-32t-2s	GSTOP_REFINEMENT	19200	641	19	13.6443	350	1791.65	2.8	0.35	0.35	1603
1104613	40	32	30	0.078084	0.440000	Intel-32t-2s	GUPDATE_REFINEMENT	19200	547	12	6.48263	350	3573.3	2.8	0.35	0.35	3210
1104613	40	32	30	0.047319	0.430000	Intel-32t-2s	GSTOP_REFINEMENT	19200	641	19	13.6443	350	1791.65	2.8	0.35	0.35	1603
1104613	40	32	30	0.078324	0.440000	Intel-32t-2s	GUPDATE_REFINEMENT	19200	547	12	6.48263	350	3573.3	2.8	0.35	0.35	3210
1104613	40	32	30	0.080623	0.440000	Intel-32t-2s	G	19200	640	13	6.76719	350	3953.3	2.8	0.35	0.35	3450
1104613	40	32	30	0.074589	0.440000	Intel-32t-2s	GUPDATE	19200	640	13	6.97031	350	3681.1	2.8	0.35	0.35	3210
1104613	40	32	30	0.049678	0.430000	Intel-32t-2s	GSTOP	19200	673	19	13.2437	350	1827.1	2.8	0.35	0.35	1603
1104613	40	32	30	0.044716	0.420000	Intel-32t-2s	GSTOP_REFINEMENT	19200	641	19	13.6443	350	1791.65	2.8	0.35	0.35	1603
1104613	40	32	30	0.076490	0.450000	Intel-32t-2s	GUPDATE_REFINEMENT	19200	547	12	6.48263	350	3573.3	2.8	0.35	0.35	3210
1104613	40	32	30	0.081959	0.450000	Intel-32t-2s	G	19200	640	13	6.76719	350	3953.3	2.8	0.35	0.35	3450
1104613	40	32	31	0.110279	0.470000	Intel-32t-2s	G	19200	620	9	4.56613	350	5608.85	2.8	0.35	0.35	4940
1104613	40	32	3	0.045930	0.620000	Intel-32t-2s	GSTOP	19200	7041	33	23.2954	350	5002.35	2.8	0.35	0.35	921
1104613	40	32	3	0.058377	0.800000	Intel-32t-2s	GUPDATE	19200	6400	31	20.1194	350	4694.3	2.8	0.35	0.35	1110
1104613	40	32	31	0.102457	0.460000	Intel-32t-2s	GUPDATE	19200	620	8	4.60161	350	5128.3	2.8	0.35	0.35	4506
1104613	40	32	3	0.088840	1.560000	Intel-32t-2s	GSTOP	19200	7041	33	23.2954	350	5002.35	2.8	0.35	0.35	921
1104613	40	32	31	0.065739	0.430000	Intel-32t-2s	GSTOP	19200	853	12	7.96952	350	3192.65	2.8	0.35	0.35	2764
1104613	40	32	31	0.101052	0.460000	Intel-32t-2s	GUPDATE	19200	620	8	4.60161	350	5128.3	2.8	0.35	0.35	4506
1104613	40	32	31	0.068238	0.430000	Intel-32t-2s	GSTOP	19200	853	12	7.96952	350	3192.65	2.8	0.35	0.35	2764
1104613	40	32	31	0.069800	0.440000	Intel-32t-2s	GSTOP_REFINEMENT	19200	762	12	8.1811	350	3104.6	2.8	0.35	0.35	2768
1104613	40	32	31	0.104051	0.460000	Intel-32t-2s	GUPDATE_REFINEMENT	19200	518	9	4.6139	350	4958.2	2.8	0.35	0.35	4506
1104613	40	32	3	0.061082	0.800000	Intel-32t-2s	GSTOP_REFINEMENT	19200	5101	28	17.1321	350	3663.4	2.8	0.35	0.35	1253
1104613	40	32	31	0.068743	0.440000	Intel-32t-2s	GSTOP_REFINEMENT	19200	762	12	8.1811	350	3104.6	2.8	0.35	0.35	2768
1104613	40	32	3	0.056921	0.500000	Intel-32t-2s	GUPDATE_REFINEMENT	19200	4018	19	12.6546	350	3194.35	2.8	0.35	0.35	1785
1104613	40	32	31	0.105318	0.460000	Intel-32t-2s	GUPDATE_REFINEMENT	19200	518	9	4.6139	350	4958.2	2.8	0.35	0.35	4506
1104613	40	32	31	0.110856	0.470000	Intel-32t-2s	G	19200	620	9	4.56613	350	5608.85	2.8	0.35	0.35	4940
1104613	40	32	31	0.101402	0.450000	Intel-32t-2s	GUPDATE	19200	620	8	4.60161	350	5128.3	2.8	0.35	0.35	4506
1104613	40	32	31	0.066837	0.420000	Intel-32t-2s	GSTOP	19200	853	12	7.96952	350	3192.65	2.8	0.35	0.35	2764
1104613	40	32	31	0.075764	0.430000	Intel-32t-2s	GSTOP_REFINEMENT	19200	762	12	8.1811	350	3104.6	2.8	0.35	0.35	2768
1104613	40	32	31	0.104012	0.460000	Intel-32t-2s	GUPDATE_REFINEMENT	19200	518	9	4.6139	350	4958.2	2.8	0.35	0.35	4506
1104613	40	32	31	0.110457	0.460000	Intel-32t-2s	G	19200	620	9	4.56613	350	5608.85	2.8	0.35	0.35	4940
1104613	40	32	32	0.109499	0.470000	Intel-32t-2s	G	19200	600	9	4.42	350	5557.3	2.8	0.35	0.35	4928
1104613	40	32	3	0.045789	0.510000	Intel-32t-2s	GSTOP_REFINEMENT	19200	5101	28	17.1321	350	3663.4	2.8	0.35	0.35	1253
1104613	40	32	32	0.110498	0.460000	Intel-32t-2s	GUPDATE	19200	600	9	4.31167	350	5651.4	2.8	0.35	0.35	4992
1104613	40	32	32	0.056268	0.430000	Intel-32t-2s	GSTOP	19200	935	15	10.5465	350	2509.15	2.8	0.35	0.35	2174
1104613	40	32	32	0.110898	0.460000	Intel-32t-2s	GUPDATE	19200	600	9	4.31167	350	5651.4	2.8	0.35	0.35	4992
1104613	40	32	32	0.058549	0.430000	Intel-32t-2s	GSTOP	19200	935	15	10.5465	350	2509.15	2.8	0.35	0.35	2174
1104613	40	32	32	0.061783	0.450000	Intel-32t-2s	GSTOP_REFINEMENT	19200	878	16	10.0216	350	2466.7	2.8	0.35	0.35	2186
1104613	40	32	32	0.114765	0.470000	Intel-32t-2s	GUPDATE_REFINEMENT	19200	482	9	4.25934	350	5454	2.8	0.35	0.35	4992
1104613	40	32	32	0.059784	0.430000	Intel-32t-2s	GSTOP_REFINEMENT	19200	878	16	10.0216	350	2466.7	2.8	0.35	0.35	2186
1104613	40	32	32	0.114228	0.470000	Intel-32t-2s	GUPDATE_REFINEMENT	19200	482	9	4.25934	350	5454	2.8	0.35	0.35	4992
1104613	40	32	32	0.109117	0.470000	Intel-32t-2s	G	19200	600	9	4.42	350	5557.3	2.8	0.35	0.35	4928
1104613	40	32	32	0.112756	0.470000	Intel-32t-2s	GUPDATE	19200	600	9	4.31167	350	5651.4	2.8	0.35	0.35	4992
1104613	40	32	32	0.058344	0.430000	Intel-32t-2s	GSTOP	19200	935	15	10.5465	350	2509.15	2.8	0.35	0.35	2174
1104613	40	32	32	0.058494	0.430000	Intel-32t-2s	GSTOP_REFINEMENT	19200	878	16	10.0216	350	2466.7	2.8	0.35	0.35	2186
1104613	40	32	32	0.114126	0.460000	Intel-32t-2s	GUPDATE_REFINEMENT	19200	482	9	4.25934	350	5454	2.8	0.35	0.35	4992
1104613	40	32	32	0.109615	0.470000	Intel-32t-2s	G	19200	600	9	4.42	350	5557.3	2.8	0.35	0.35	4928
1104613	40	32	33	0.109017	0.470000	Intel-32t-2s	G	19200	582	8	4.44845	350	5465.2	2.8	0.35	0.35	4845
1104613	40	32	3	0.056834	0.510000	Intel-32t-2s	GUPDATE_REFINEMENT	19200	4018	19	12.6546	350	3194.35	2.8	0.35	0.35	1785
1104613	40	32	33	0.098119	0.460000	Intel-32t-2s	GUPDATE	19200	582	9	4.90378	350	5038.05	2.8	0.35	0.35	4449
1104613	40	32	33	0.053092	0.430000	Intel-32t-2s	GSTOP	19200	812	17	10.9643	350	2300.6	2.8	0.35	0.35	1993
1104613	40	32	33	0.100337	0.460000	Intel-32t-2s	GUPDATE	19200	582	9	4.90378	350	5038.05	2.8	0.35	0.35	4449
1104613	40	32	33	0.053227	0.430000	Intel-32t-2s	GSTOP	19200	812	17	10.9643	350	2300.6	2.8	0.35	0.35	1993
1104613	40	32	33	0.052826	0.430000	Intel-32t-2s	GSTOP_REFINEMENT	19200	766	18	10.6488	350	2271.35	2.8	0.35	0.35	2010
1104613	40	32	33	0.100988	0.460000	Intel-32t-2s	GUPDATE_REFINEMENT	19200	477	8	4.66667	350	4852.2	2.8	0.35	0.35	4449
1104613	40	32	33	0.053860	0.440000	Intel-32t-2s	GSTOP_REFINEMENT	19200	766	18	10.6488	350	2271.35	2.8	0.35	0.35	2010
1104613	40	32	33	0.103548	0.470000	Intel-32t-2s	GUPDATE_REFINEMENT	19200	477	8	4.66667	350	4852.2	2.8	0.35	0.35	4449
1104613	40	32	33	0.108107	0.460000	Intel-32t-2s	G	19200	582	8	4.44845	350	5465.2	2.8	0.35	0.35	4845
1104613	40	32	33	0.098192	0.460000	Intel-32t-2s	GUPDATE	19200	582	9	4.90378	350	5038.05	2.8	0.35	0.35	4449
1104613	40	32	33	0.052121	0.430000	Intel-32t-2s	GSTOP	19200	812	17	10.9643	350	2300.6	2.8	0.35	0.35	1993
1104613	40	32	33	0.057028	0.450000	Intel-32t-2s	GSTOP_REFINEMENT	19200	766	18	10.6488	350	2271.35	2.8	0.35	0.35	2010
1104613	40	32	33	0.101193	0.460000	Intel-32t-2s	GUPDATE_REFINEMENT	19200	477	8	4.66667	350	4852.2	2.8	0.35	0.35	4449
1104613	40	32	33	0.108915	0.470000	Intel-32t-2s	G	19200	582	8	4.44845	350	5465.2	2.8	0.35	0.35	4845
1104613	40	32	34	0.106634	0.470000	Intel-32t-2s	G	19200	565	8	4.51858	350	5246.85	2.8	0.35	0.35	4648
1104613	40	32	3	0.054114	0.570000	Intel-32t-2s	G	19200	6400	28	15.6781	350	4755.35	2.8	0.35	0.35	1407
1104613	40	32	34	0.108386	0.470000	Intel-32t-2s	GUPDATE	19200	565	9	4.46018	350	5449.1	2.8	0.35	0.35	4852
1104613	40	32	34	0.056698	0.430000	Intel-32t-2s	GSTOP	19200	774	18	11.062	350	2368.95	2.8	0.35	0.35	2056
1104613	40	32	34	0.109333	0.460000	Intel-32t-2s	GUPDATE	19200	565	9	4.46018	350	5449.1	2.8	0.35	0.35	4852
1104613	40	32	34	0.054013	0.440000	Intel-32t-2s	GSTOP	19200	774	18	11.062	350	2368.95	2.8	0.35	0.35	2056
1104613	40	32	34	0.056201	0.440000	Intel-32t-2s	GSTOP_REFINEMENT	19200	739	16	10.7645	350	2328.45	2.8	0.35	0.35	2072
1104613	40	32	34	0.112412	0.470000	Intel-32t-2s	GUPDATE_REFINEMENT	19200	467	9	4.34047	350	5297.9	2.8	0.35	0.35	4852
1104613	40	32	34	0.057454	0.430000	Intel-32t-2s	GSTOP_REFINEMENT	19200	739	16	10.7645	350	2328.45	2.8	0.35	0.35	2072
1104613	40	32	34	0.110961	0.460000	Intel-32t-2s	GUPDATE_REFINEMENT	19200	467	9	4.34047	350	5297.9	2.8	0.35	0.35	4852
1104613	40	32	34	0.105453	0.470000	Intel-32t-2s	G	19200	565	8	4.51858	350	5246.85	2.8	0.35	0.35	4648
1104613	40	32	34	0.110396	0.470000	Intel-32t-2s	GUPDATE	19200	565	9	4.46018	350	5449.1	2.8	0.35	0.35	4852
1104613	40	32	34	0.052958	0.420000	Intel-32t-2s	GSTOP	19200	774	18	11.062	350	2368.95	2.8	0.35	0.35	2056
1104613	40	32	34	0.056247	0.430000	Intel-32t-2s	GSTOP_REFINEMENT	19200	739	16	10.7645	350	2328.45	2.8	0.35	0.35	2072
1104613	40	32	34	0.109575	0.460000	Intel-32t-2s	GUPDATE_REFINEMENT	19200	467	9	4.34047	350	5297.9	2.8	0.35	0.35	4852
1104613	40	32	34	0.105646	0.460000	Intel-32t-2s	G	19200	565	8	4.51858	350	5246.85	2.8	0.35	0.35	4648
1104613	40	32	35	0.101946	0.470000	Intel-32t-2s	G	19200	549	11	4.81603	350	5035.15	2.8	0.35	0.35	4465
1104613	40	32	3	0.065909	0.950000	Intel-32t-2s	GUPDATE	19200	6400	31	20.1194	350	4694.3	2.8	0.35	0.35	1110
1104613	40	32	35	0.095688	0.460000	Intel-32t-2s	GUPDATE	19200	549	11	5.15483	350	4739.05	2.8	0.35	0.35	4220
1104613	40	32	35	0.054403	0.420000	Intel-32t-2s	GSTOP	19200	584	15	9.95034	350	2133.5	2.8	0.35	0.35	1875
1104613	40	32	35	0.094058	0.460000	Intel-32t-2s	GUPDATE	19200	549	11	5.15483	350	4739.05	2.8	0.35	0.35	4220
1104613	40	32	35	0.053060	0.430000	Intel-32t-2s	GSTOP	19200	584	15	9.95034	350	2133.5	2.8	0.35	0.35	1875
1104613	40	32	35	0.050765	0.420000	Intel-32t-2s	GSTOP_REFINEMENT	19200	563	15	10.0089	350	2109.1	2.8	0.35	0.35	1905
1104613	40	32	35	0.099937	0.460000	Intel-32t-2s	GUPDATE_REFINEMENT	19200	466	9	4.83691	350	4609.9	2.8	0.35	0.35	4220
1104613	40	32	35	0.054768	0.430000	Intel-32t-2s	GSTOP_REFINEMENT	19200	563	15	10.0089	350	2109.1	2.8	0.35	0.35	1905
1104613	40	32	35	0.099025	0.460000	Intel-32t-2s	GUPDATE_REFINEMENT	19200	466	9	4.83691	350	4609.9	2.8	0.35	0.35	4220
1104613	40	32	35	0.101134	0.460000	Intel-32t-2s	G	19200	549	11	4.81603	350	5035.15	2.8	0.35	0.35	4465
1104613	40	32	35	0.095289	0.450000	Intel-32t-2s	GUPDATE	19200	549	11	5.15483	350	4739.05	2.8	0.35	0.35	4220
1104613	40	32	35	0.052059	0.410000	Intel-32t-2s	GSTOP	19200	584	15	9.95034	350	2133.5	2.8	0.35	0.35	1875
1104613	40	32	35	0.053638	0.430000	Intel-32t-2s	GSTOP_REFINEMENT	19200	563	15	10.0089	350	2109.1	2.8	0.35	0.35	1905
1104613	40	32	35	0.099720	0.450000	Intel-32t-2s	GUPDATE_REFINEMENT	19200	466	9	4.83691	350	4609.9	2.8	0.35	0.35	4220
1104613	40	32	35	0.100570	0.460000	Intel-32t-2s	G	19200	549	11	4.81603	350	5035.15	2.8	0.35	0.35	4465
1104613	40	32	36	0.077436	0.440000	Intel-32t-2s	G	19200	534	16	7.69663	350	3728.95	2.8	0.35	0.35	3324
1104613	40	32	3	0.080421	1.430000	Intel-32t-2s	GSTOP	19200	7041	33	23.2954	350	5002.35	2.8	0.35	0.35	921
1104613	40	32	36	0.066904	0.430000	Intel-32t-2s	GUPDATE	19200	534	16	8.48876	350	3196.2	2.8	0.35	0.35	2856
1104613	40	32	36	0.047256	0.430000	Intel-32t-2s	GSTOP	19200	557	17	12.2657	350	1865.65	2.8	0.35	0.35	1656
1104613	40	32	36	0.071025	0.440000	Intel-32t-2s	GUPDATE	19200	534	16	8.48876	350	3196.2	2.8	0.35	0.35	2856
1104613	40	32	36	0.051275	0.420000	Intel-32t-2s	GSTOP	19200	557	17	12.2657	350	1865.65	2.8	0.35	0.35	1656
1104613	40	32	36	0.049894	0.430000	Intel-32t-2s	GSTOP_REFINEMENT	19200	544	19	13.0018	350	1836.85	2.8	0.35	0.35	1656
1104613	40	32	36	0.070674	0.440000	Intel-32t-2s	GUPDATE_REFINEMENT	19200	466	16	8.69957	350	3114.65	2.8	0.35	0.35	2856
1104613	40	32	36	0.048930	0.430000	Intel-32t-2s	GSTOP_REFINEMENT	19200	544	19	13.0018	350	1836.85	2.8	0.35	0.35	1656
1104613	40	32	36	0.070580	0.430000	Intel-32t-2s	GUPDATE_REFINEMENT	19200	466	16	8.69957	350	3114.65	2.8	0.35	0.35	2856
1104613	40	32	36	0.078728	0.450000	Intel-32t-2s	G	19200	534	16	7.69663	350	3728.95	2.8	0.35	0.35	3324
1104613	40	32	36	0.069841	0.430000	Intel-32t-2s	GUPDATE	19200	534	16	8.48876	350	3196.2	2.8	0.35	0.35	2856
1104613	40	32	36	0.047796	0.420000	Intel-32t-2s	GSTOP	19200	557	17	12.2657	350	1865.65	2.8	0.35	0.35	1656
1104613	40	32	36	0.051309	0.430000	Intel-32t-2s	GSTOP_REFINEMENT	19200	544	19	13.0018	350	1836.85	2.8	0.35	0.35	1656
1104613	40	32	36	0.069899	0.430000	Intel-32t-2s	GUPDATE_REFINEMENT	19200	466	16	8.69957	350	3114.65	2.8	0.35	0.35	2856
1104613	40	32	36	0.078119	0.450000	Intel-32t-2s	G	19200	534	16	7.69663	350	3728.95	2.8	0.35	0.35	3324
1104613	40	32	37	0.110071	0.460000	Intel-32t-2s	G	19200	519	8	4.25626	350	5548.85	2.8	0.35	0.35	4992
1104613	40	32	3	0.048248	0.560000	Intel-32t-2s	GSTOP_REFINEMENT	19200	5101	28	17.1321	350	3663.4	2.8	0.35	0.35	1253
1104613	40	32	37	0.102724	0.450000	Intel-32t-2s	GUPDATE	19200	519	9	4.48748	350	5164.85	2.8	0.35	0.35	4622
1104613	40	32	37	0.071902	0.440000	Intel-32t-2s	GSTOP	19200	776	13	8.17526	350	3377.65	2.8	0.35	0.35	2981
1104613	40	32	37	0.103001	0.460000	Intel-32t-2s	GUPDATE	19200	519	9	4.48748	350	5164.85	2.8	0.35	0.35	4622
1104613	40	32	37	0.073069	0.450000	Intel-32t-2s	GSTOP	19200	776	13	8.17526	350	3377.65	2.8	0.35	0.35	2981
1104613	40	32	37	0.075378	0.460000	Intel-32t-2s	GSTOP_REFINEMENT	19200	705	13	8.06099	350	3307.75	2.8	0.35	0.35	3002
1104613	40	32	37	0.107260	0.470000	Intel-32t-2s	GUPDATE_REFINEMENT	19200	424	8	4.36557	350	5022.05	2.8	0.35	0.35	4622
1104613	40	32	37	0.073513	0.450000	Intel-32t-2s	GSTOP_REFINEMENT	19200	705	13	8.06099	350	3307.75	2.8	0.35	0.35	3002
1104613	40	32	37	0.107168	0.470000	Intel-32t-2s	GUPDATE_REFINEMENT	19200	424	8	4.36557	350	5022.05	2.8	0.35	0.35	4622
1104613	40	32	37	0.110848	0.470000	Intel-32t-2s	G	19200	519	8	4.25626	350	5548.85	2.8	0.35	0.35	4992
1104613	40	32	37	0.104203	0.460000	Intel-32t-2s	GUPDATE	19200	519	9	4.48748	350	5164.85	2.8	0.35	0.35	4622
1104613	40	32	37	0.074495	0.440000	Intel-32t-2s	GSTOP	19200	776	13	8.17526	350	3377.65	2.8	0.35	0.35	2981
1104613	40	32	37	0.072783	0.440000	Intel-32t-2s	GSTOP_REFINEMENT	19200	705	13	8.06099	350	3307.75	2.8	0.35	0.35	3002
1104613	40	32	37	0.105516	0.460000	Intel-32t-2s	GUPDATE_REFINEMENT	19200	424	8	4.36557	350	5022.05	2.8	0.35	0.35	4622
1104613	40	32	37	0.110073	0.470000	Intel-32t-2s	G	19200	519	8	4.25626	350	5548.85	2.8	0.35	0.35	4992
1104613	40	32	38	0.131652	0.500000	Intel-32t-2s	G	19200	506	8	3.68182	350	6505.65	2.8	0.35	0.35	5862
1104613	40	32	3	0.058315	0.510000	Intel-32t-2s	GUPDATE_REFINEMENT	19200	4018	19	12.6546	350	3194.35	2.8	0.35	0.35	1785
1104613	40	32	38	0.125680	0.480000	Intel-32t-2s	GUPDATE	19200	506	8	3.78063	350	6377.3	2.8	0.35	0.35	5748
1104613	40	32	38	0.064060	0.440000	Intel-32t-2s	GSTOP	19200	755	15	9.48874	350	2686.4	2.8	0.35	0.35	2375
1104613	40	32	38	0.127345	0.490000	Intel-32t-2s	GUPDATE	19200	506	8	3.78063	350	6377.3	2.8	0.35	0.35	5748
1104613	40	32	38	0.062055	0.420000	Intel-32t-2s	GSTOP	19200	755	15	9.48874	350	2686.4	2.8	0.35	0.35	2375
1104613	40	32	38	0.060367	0.420000	Intel-32t-2s	GSTOP_REFINEMENT	19200	704	14	9.16193	350	2648.2	2.8	0.35	0.35	2386
1104613	40	32	38	0.130620	0.490000	Intel-32t-2s	GUPDATE_REFINEMENT	19200	398	7	3.75377	350	6178.15	2.8	0.35	0.35	5748
1104613	40	32	38	0.067708	0.450000	Intel-32t-2s	GSTOP_REFINEMENT	19200	704	14	9.16193	350	2648.2	2.8	0.35	0.35	2386
1104613	40	32	38	0.129026	0.480000	Intel-32t-2s	GUPDATE_REFINEMENT	19200	398	7	3.75377	350	6178.15	2.8	0.35	0.35	5748
1104613	40	32	38	0.129847	0.480000	Intel-32t-2s	G	19200	506	8	3.68182	350	6505.65	2.8	0.35	0.35	5862
1104613	40	32	38	0.126843	0.480000	Intel-32t-2s	GUPDATE	19200	506	8	3.78063	350	6377.3	2.8	0.35	0.35	5748
1104613	40	32	38	0.060226	0.430000	Intel-32t-2s	GSTOP	19200	755	15	9.48874	350	2686.4	2.8	0.35	0.35	2375
1104613	40	32	38	0.062434	0.430000	Intel-32t-2s	GSTOP_REFINEMENT	19200	704	14	9.16193	350	2648.2	2.8	0.35	0.35	2386
1104613	40	32	38	0.130156	0.490000	Intel-32t-2s	GUPDATE_REFINEMENT	19200	398	7	3.75377	350	6178.15	2.8	0.35	0.35	5748
1104613	40	32	38	0.131731	0.490000	Intel-32t-2s	G	19200	506	8	3.68182	350	6505.65	2.8	0.35	0.35	5862
1104613	40	32	39	0.110433	0.460000	Intel-32t-2s	G	19200	493	8	4.34483	350	5429.85	2.8	0.35	0.35	4887
1104613	40	32	3	0.067868	0.860000	Intel-32t-2s	G	19200	6400	28	15.6781	350	4755.35	2.8	0.35	0.35	1407
1104613	40	32	39	0.114683	0.470000	Intel-32t-2s	GUPDATE	19200	493	7	3.91278	350	5797.65	2.8	0.35	0.35	5238
1104613	40	32	39	0.054254	0.420000	Intel-32t-2s	GSTOP	19200	650	13	9.89385	350	2274.85	2.8	0.35	0.35	2013
1104613	40	32	39	0.117281	0.470000	Intel-32t-2s	GUPDATE	19200	493	7	3.91278	350	5797.65	2.8	0.35	0.35	5238
1104613	40	32	39	0.053928	0.430000	Intel-32t-2s	GSTOP	19200	650	13	9.89385	350	2274.85	2.8	0.35	0.35	2013
1104613	40	32	39	0.056144	0.430000	Intel-32t-2s	GSTOP_REFINEMENT	19200	625	15	10.0096	350	2248.45	2.8	0.35	0.35	2017
1104613	40	32	39	0.118311	0.460000	Intel-32t-2s	GUPDATE_REFINEMENT	19200	408	8	3.80882	350	5649.6	2.8	0.35	0.35	5238
1104613	40	32	39	0.053822	0.410000	Intel-32t-2s	GSTOP_REFINEMENT	19200	625	15	10.0096	350	2248.45	2.8	0.35	0.35	2017
1104613	40	32	39	0.121482	0.480000	Intel-32t-2s	GUPDATE_REFINEMENT	19200	408	8	3.80882	350	5649.6	2.8	0.35	0.35	5238
1104613	40	32	39	0.110326	0.480000	Intel-32t-2s	G	19200	493	8	4.34483	350	5429.85	2.8	0.35	0.35	4887
1104613	40	32	39	0.117317	0.470000	Intel-32t-2s	GUPDATE	19200	493	7	3.91278	350	5797.65	2.8	0.35	0.35	5238
1104613	40	32	39	0.055337	0.430000	Intel-32t-2s	GSTOP	19200	650	13	9.89385	350	2274.85	2.8	0.35	0.35	2013
1104613	40	32	39	0.054506	0.420000	Intel-32t-2s	GSTOP_REFINEMENT	19200	625	15	10.0096	350	2248.45	2.8	0.35	0.35	2017
1104613	40	32	39	0.118607	0.480000	Intel-32t-2s	GUPDATE_REFINEMENT	19200	408	8	3.80882	350	5649.6	2.8	0.35	0.35	5238
1104613	40	32	39	0.109429	0.460000	Intel-32t-2s	G	19200	493	8	4.34483	350	5429.85	2.8	0.35	0.35	4887
1104613	40	32	4	0.033705	0.540000	Intel-32t-2s	G	19200	4800	60	46.1	350	3410.95	2.8	0.35	0.35	672
1104613	40	32	40	0.105704	0.470000	Intel-32t-2s	G	19200	480	8	4.46875	350	5267.85	2.8	0.35	0.35	4760
1104613	40	32	4	0.034822	0.540000	Intel-32t-2s	GUPDATE	19200	4800	60	46.1	350	3412.35	2.8	0.35	0.35	672
1104613	40	32	40	0.101600	0.460000	Intel-32t-2s	GUPDATE	19200	480	9	4.57292	350	5105.75	2.8	0.35	0.35	4600
1104613	40	32	40	0.062321	0.420000	Intel-32t-2s	GSTOP	19200	571	13	8.48161	350	2814	2.8	0.35	0.35	2538
1104613	40	32	40	0.103587	0.460000	Intel-32t-2s	GUPDATE	19200	480	9	4.57292	350	5105.75	2.8	0.35	0.35	4600
1104613	40	32	40	0.062105	0.430000	Intel-32t-2s	GSTOP	19200	571	13	8.48161	350	2814	2.8	0.35	0.35	2538
1104613	40	32	40	0.062370	0.420000	Intel-32t-2s	GSTOP_REFINEMENT	19200	541	13	8.44547	350	2792.95	2.8	0.35	0.35	2572
1104613	40	32	40	0.104151	0.460000	Intel-32t-2s	GUPDATE_REFINEMENT	19200	411	8	4.58394	350	4965.05	2.8	0.35	0.35	4600
1104613	40	32	40	0.064462	0.410000	Intel-32t-2s	GSTOP_REFINEMENT	19200	541	13	8.44547	350	2792.95	2.8	0.35	0.35	2572
1104613	40	32	40	0.106914	0.460000	Intel-32t-2s	GUPDATE_REFINEMENT	19200	411	8	4.58394	350	4965.05	2.8	0.35	0.35	4600
1104613	40	32	40	0.105858	0.460000	Intel-32t-2s	G	19200	480	8	4.46875	350	5267.85	2.8	0.35	0.35	4760
1104613	40	32	40	0.102672	0.460000	Intel-32t-2s	GUPDATE	19200	480	9	4.57292	350	5105.75	2.8	0.35	0.35	4600
1104613	40	32	40	0.061321	0.410000	Intel-32t-2s	GSTOP	19200	571	13	8.48161	350	2814	2.8	0.35	0.35	2538
1104613	40	32	40	0.060770	0.410000	Intel-32t-2s	GSTOP_REFINEMENT	19200	541	13	8.44547	350	2792.95	2.8	0.35	0.35	2572
1104613	40	32	40	0.105922	0.470000	Intel-32t-2s	GUPDATE_REFINEMENT	19200	411	8	4.58394	350	4965.05	2.8	0.35	0.35	4600
1104613	40	32	40	0.105027	0.460000	Intel-32t-2s	G	19200	480	8	4.46875	350	5267.85	2.8	0.35	0.35	4760
1104613	40	32	41	0.121129	0.480000	Intel-32t-2s	G	19200	469	8	3.94883	350	6041.45	2.8	0.35	0.35	5465
1104613	40	32	4	0.053375	0.990000	Intel-32t-2s	GSTOP	19200	4800	60	46.1	350	3410.95	2.8	0.35	0.35	672
1104613	40	32	4	0.056836	1.050000	Intel-32t-2s	GUPDATE	19200	4800	60	46.1	350	3412.35	2.8	0.35	0.35	672
1104613	40	32	41	0.115559	0.470000	Intel-32t-2s	GUPDATE	19200	469	8	4.02345	350	5755.2	2.8	0.35	0.35	5219
1104613	40	32	4	0.049372	0.570000	Intel-32t-2s	GSTOP	19200	4800	60	46.1	350	3410.95	2.8	0.35	0.35	672
1104613	40	32	41	0.056195	0.420000	Intel-32t-2s	GSTOP	19200	698	14	9.33668	350	2357.7	2.8	0.35	0.35	2095
1104613	40	32	41	0.119094	0.480000	Intel-32t-2s	GUPDATE	19200	469	8	4.02345	350	5755.2	2.8	0.35	0.35	5219
1104613	40	32	41	0.056391	0.430000	Intel-32t-2s	GSTOP	19200	698	14	9.33668	350	2357.7	2.8	0.35	0.35	2095
1104613	40	32	41	0.055955	0.430000	Intel-32t-2s	GSTOP_REFINEMENT	19200	640	14	9.30625	350	2320.5	2.8	0.35	0.35	2102
1104613	40	32	41	0.120636	0.480000	Intel-32t-2s	GUPDATE_REFINEMENT	19200	373	7	3.80965	350	5602.25	2.8	0.35	0.35	5219
1104613	40	32	4	0.042921	0.540000	Intel-32t-2s	GSTOP_REFINEMENT	19200	3086	37	21.0651	350	2241.2	2.8	0.35	0.35	1096
1104613	40	32	41	0.057423	0.430000	Intel-32t-2s	GSTOP_REFINEMENT	19200	640	14	9.30625	350	2320.5	2.8	0.35	0.35	2102
1104613	40	32	4	0.040968	0.480000	Intel-32t-2s	GUPDATE_REFINEMENT	19200	3104	34	21.6314	350	2257.55	2.8	0.35	0.35	1076
1104613	40	32	41	0.120199	0.470000	Intel-32t-2s	GUPDATE_REFINEMENT	19200	373	7	3.80965	350	5602.25	2.8	0.35	0.35	5219
1104613	40	32	41	0.122014	0.480000	Intel-32t-2s	G	19200	469	8	3.94883	350	6041.45	2.8	0.35	0.35	5465
1104613	40	32	41	0.115626	0.470000	Intel-32t-2s	GUPDATE	19200	469	8	4.02345	350	5755.2	2.8	0.35	0.35	5219
1104613	40	32	41	0.054881	0.410000	Intel-32t-2s	GSTOP	19200	698	14	9.33668	350	2357.7	2.8	0.35	0.35	2095
1104613	40	32	41	0.058471	0.430000	Intel-32t-2s	GSTOP_REFINEMENT	19200	640	14	9.30625	350	2320.5	2.8	0.35	0.35	2102
1104613	40	32	41	0.120360	0.480000	Intel-32t-2s	GUPDATE_REFINEMENT	19200	373	7	3.80965	350	5602.25	2.8	0.35	0.35	5219
1104613	40	32	41	0.120974	0.480000	Intel-32t-2s	G	19200	469	8	3.94883	350	6041.45	2.8	0.35	0.35	5465
1104613	40	32	42	0.098024	0.470000	Intel-32t-2s	G	19200	458	11	5.25764	350	4811.85	2.8	0.35	0.35	4374
1104613	40	32	4	0.054285	0.550000	Intel-32t-2s	GSTOP_REFINEMENT	19200	3086	37	21.0651	350	2241.2	2.8	0.35	0.35	1096
1104613	40	32	42	0.102203	0.450000	Intel-32t-2s	GUPDATE	19200	458	11	5.19214	350	5056.15	2.8	0.35	0.35	4584
1104613	40	32	42	0.053242	0.420000	Intel-32t-2s	GSTOP	19200	492	15	10.9878	350	2190.2	2.8	0.35	0.35	1989
1104613	40	32	42	0.100854	0.450000	Intel-32t-2s	GUPDATE	19200	458	11	5.19214	350	5056.15	2.8	0.35	0.35	4584
1104613	40	32	42	0.051496	0.430000	Intel-32t-2s	GSTOP	19200	492	15	10.9878	350	2190.2	2.8	0.35	0.35	1989
1104613	40	32	42	0.054173	0.420000	Intel-32t-2s	GSTOP_REFINEMENT	19200	472	15	10.947	350	2163.65	2.8	0.35	0.35	2003
1104613	40	32	42	0.105888	0.470000	Intel-32t-2s	GUPDATE_REFINEMENT	19200	367	9	4.87193	350	4910.55	2.8	0.35	0.35	4584
1104613	40	32	42	0.053204	0.420000	Intel-32t-2s	GSTOP_REFINEMENT	19200	472	15	10.947	350	2163.65	2.8	0.35	0.35	2003
1104613	40	32	42	0.105819	0.470000	Intel-32t-2s	GUPDATE_REFINEMENT	19200	367	9	4.87193	350	4910.55	2.8	0.35	0.35	4584
1104613	40	32	42	0.098588	0.460000	Intel-32t-2s	G	19200	458	11	5.25764	350	4811.85	2.8	0.35	0.35	4374
1104613	40	32	42	0.102388	0.460000	Intel-32t-2s	GUPDATE	19200	458	11	5.19214	350	5056.15	2.8	0.35	0.35	4584
1104613	40	32	42	0.052429	0.420000	Intel-32t-2s	GSTOP	19200	492	15	10.9878	350	2190.2	2.8	0.35	0.35	1989
1104613	40	32	42	0.053793	0.410000	Intel-32t-2s	GSTOP_REFINEMENT	19200	472	15	10.947	350	2163.65	2.8	0.35	0.35	2003
1104613	40	32	42	0.111084	0.460000	Intel-32t-2s	GUPDATE_REFINEMENT	19200	367	9	4.87193	350	4910.55	2.8	0.35	0.35	4584
1104613	40	32	42	0.098012	0.460000	Intel-32t-2s	G	19200	458	11	5.25764	350	4811.85	2.8	0.35	0.35	4374
1104613	40	32	43	0.127385	0.480000	Intel-32t-2s	G	19200	447	9	3.66219	350	6297.5	2.8	0.35	0.35	5741
1104613	40	32	4	0.044604	0.570000	Intel-32t-2s	GUPDATE_REFINEMENT	19200	3104	34	21.6314	350	2257.55	2.8	0.35	0.35	1076
1104613	40	32	43	0.121213	0.480000	Intel-32t-2s	GUPDATE	19200	447	7	3.97539	350	5969.55	2.8	0.35	0.35	5440
1104613	40	32	43	0.076433	0.430000	Intel-32t-2s	GSTOP	19200	610	9	7.01148	350	3474.6	2.8	0.35	0.35	3127
1104613	40	32	43	0.120825	0.470000	Intel-32t-2s	GUPDATE	19200	447	7	3.97539	350	5969.55	2.8	0.35	0.35	5440
1104613	40	32	43	0.079799	0.430000	Intel-32t-2s	GSTOP	19200	610	9	7.01148	350	3474.6	2.8	0.35	0.35	3127
1104613	40	32	43	0.075592	0.430000	Intel-32t-2s	GSTOP_REFINEMENT	19200	531	10	7.3484	350	3387.7	2.8	0.35	0.35	3128
1104613	40	32	43	0.124037	0.470000	Intel-32t-2s	GUPDATE_REFINEMENT	19200	344	7	3.84012	350	5802.95	2.8	0.35	0.35	5440
1104613	40	32	43	0.079535	0.430000	Intel-32t-2s	GSTOP_REFINEMENT	19200	531	10	7.3484	350	3387.7	2.8	0.35	0.35	3128
1104613	40	32	43	0.124710	0.480000	Intel-32t-2s	GUPDATE_REFINEMENT	19200	344	7	3.84012	350	5802.95	2.8	0.35	0.35	5440
1104613	40	32	43	0.126805	0.480000	Intel-32t-2s	G	19200	447	9	3.66219	350	6297.5	2.8	0.35	0.35	5741
1104613	40	32	43	0.120495	0.470000	Intel-32t-2s	GUPDATE	19200	447	7	3.97539	350	5969.55	2.8	0.35	0.35	5440
1104613	40	32	43	0.077983	0.430000	Intel-32t-2s	GSTOP	19200	610	9	7.01148	350	3474.6	2.8	0.35	0.35	3127
1104613	40	32	43	0.077764	0.440000	Intel-32t-2s	GSTOP_REFINEMENT	19200	531	10	7.3484	350	3387.7	2.8	0.35	0.35	3128
1104613	40	32	43	0.124156	0.470000	Intel-32t-2s	GUPDATE_REFINEMENT	19200	344	7	3.84012	350	5802.95	2.8	0.35	0.35	5440
1104613	40	32	43	0.126030	0.470000	Intel-32t-2s	G	19200	447	9	3.66219	350	6297.5	2.8	0.35	0.35	5741
1104613	40	32	44	0.130984	0.490000	Intel-32t-2s	G	19200	437	8	3.56751	350	6477.25	2.8	0.35	0.35	5912
1104613	40	32	4	0.034556	0.540000	Intel-32t-2s	G	19200	4800	60	46.1	350	3410.95	2.8	0.35	0.35	672
1104613	40	32	44	0.118583	0.470000	Intel-32t-2s	GUPDATE	19200	437	8	4.11213	350	5811.55	2.8	0.35	0.35	5296
1104613	40	32	44	0.063486	0.430000	Intel-32t-2s	GSTOP	19200	696	12	8.66667	350	3016.65	2.8	0.35	0.35	2702
1104613	40	32	44	0.117470	0.460000	Intel-32t-2s	GUPDATE	19200	437	8	4.11213	350	5811.55	2.8	0.35	0.35	5296
1104613	40	32	44	0.064675	0.440000	Intel-32t-2s	GSTOP	19200	696	12	8.66667	350	3016.65	2.8	0.35	0.35	2702
1104613	40	32	44	0.066638	0.440000	Intel-32t-2s	GSTOP_REFINEMENT	19200	636	12	8.57547	350	2969.5	2.8	0.35	0.35	2706
1104613	40	32	44	0.121312	0.470000	Intel-32t-2s	GUPDATE_REFINEMENT	19200	352	8	3.90625	350	5665.95	2.8	0.35	0.35	5296
1104613	40	32	44	0.066201	0.440000	Intel-32t-2s	GSTOP_REFINEMENT	19200	636	12	8.57547	350	2969.5	2.8	0.35	0.35	2706
1104613	40	32	44	0.121325	0.480000	Intel-32t-2s	GUPDATE_REFINEMENT	19200	352	8	3.90625	350	5665.95	2.8	0.35	0.35	5296
1104613	40	32	44	0.129373	0.470000	Intel-32t-2s	G	19200	437	8	3.56751	350	6477.25	2.8	0.35	0.35	5912
1104613	40	32	44	0.117023	0.480000	Intel-32t-2s	GUPDATE	19200	437	8	4.11213	350	5811.55	2.8	0.35	0.35	5296
1104613	40	32	44	0.065809	0.430000	Intel-32t-2s	GSTOP	19200	696	12	8.66667	350	3016.65	2.8	0.35	0.35	2702
1104613	40	32	44	0.065675	0.430000	Intel-32t-2s	GSTOP_REFINEMENT	19200	636	12	8.57547	350	2969.5	2.8	0.35	0.35	2706
1104613	40	32	44	0.122085	0.460000	Intel-32t-2s	GUPDATE_REFINEMENT	19200	352	8	3.90625	350	5665.95	2.8	0.35	0.35	5296
1104613	40	32	44	0.129958	0.480000	Intel-32t-2s	G	19200	437	8	3.56751	350	6477.25	2.8	0.35	0.35	5912
1104613	40	32	45	0.126974	0.480000	Intel-32t-2s	G	19200	427	8	3.82201	350	6382.4	2.8	0.35	0.35	5835
1104613	40	32	4	0.062239	1.150000	Intel-32t-2s	GUPDATE	19200	4800	60	46.1	350	3412.35	2.8	0.35	0.35	672
1104613	40	32	45	0.120016	0.470000	Intel-32t-2s	GUPDATE	19200	427	8	4.08431	350	5936.8	2.8	0.35	0.35	5430
1104613	40	32	45	0.060246	0.430000	Intel-32t-2s	GSTOP	19200	649	15	9.453	350	2766.9	2.8	0.35	0.35	2485
1104613	40	32	45	0.119563	0.460000	Intel-32t-2s	GUPDATE	19200	427	8	4.08431	350	5936.8	2.8	0.35	0.35	5430
1104613	40	32	45	0.059372	0.440000	Intel-32t-2s	GSTOP	19200	649	15	9.453	350	2766.9	2.8	0.35	0.35	2485
1104613	40	32	45	0.063540	0.440000	Intel-32t-2s	GSTOP_REFINEMENT	19200	600	15	9.475	350	2723.85	2.8	0.35	0.35	2500
1104613	40	32	45	0.122584	0.470000	Intel-32t-2s	GUPDATE_REFINEMENT	19200	344	8	3.9564	350	5790.85	2.8	0.35	0.35	5430
1104613	40	32	45	0.061106	0.430000	Intel-32t-2s	GSTOP_REFINEMENT	19200	600	15	9.475	350	2723.85	2.8	0.35	0.35	2500
1104613	40	32	45	0.122708	0.490000	Intel-32t-2s	GUPDATE_REFINEMENT	19200	344	8	3.9564	350	5790.85	2.8	0.35	0.35	5430
1104613	40	32	45	0.127183	0.470000	Intel-32t-2s	G	19200	427	8	3.82201	350	6382.4	2.8	0.35	0.35	5835
1104613	40	32	45	0.120146	0.470000	Intel-32t-2s	GUPDATE	19200	427	8	4.08431	350	5936.8	2.8	0.35	0.35	5430
1104613	40	32	45	0.062465	0.430000	Intel-32t-2s	GSTOP	19200	649	15	9.453	350	2766.9	2.8	0.35	0.35	2485
1104613	40	32	45	0.059308	0.430000	Intel-32t-2s	GSTOP_REFINEMENT	19200	600	15	9.475	350	2723.85	2.8	0.35	0.35	2500
1104613	40	32	45	0.124936	0.470000	Intel-32t-2s	GUPDATE_REFINEMENT	19200	344	8	3.9564	350	5790.85	2.8	0.35	0.35	5430
1104613	40	32	45	0.126908	0.480000	Intel-32t-2s	G	19200	427	8	3.82201	350	6382.4	2.8	0.35	0.35	5835
1104613	40	32	46	0.130420	0.490000	Intel-32t-2s	G	19200	418	7	3.5	350	6492.05	2.8	0.35	0.35	5952
1104613	40	32	4	0.032753	0.560000	Intel-32t-2s	GSTOP	19200	4800	60	46.1	350	3410.95	2.8	0.35	0.35	672
1104613	40	32	46	0.131404	0.490000	Intel-32t-2s	GUPDATE	19200	418	8	3.73206	350	6498.7	2.8	0.35	0.35	5952
1104613	40	32	46	0.063386	0.430000	Intel-32t-2s	GSTOP	19200	583	14	9.25043	350	2847.7	2.8	0.35	0.35	2574
1104613	40	32	46	0.131757	0.480000	Intel-32t-2s	GUPDATE	19200	418	8	3.73206	350	6498.7	2.8	0.35	0.35	5952
1104613	40	32	46	0.060817	0.430000	Intel-32t-2s	GSTOP	19200	583	14	9.25043	350	2847.7	2.8	0.35	0.35	2574
1104613	40	32	46	0.063627	0.430000	Intel-32t-2s	GSTOP_REFINEMENT	19200	534	13	8.92884	350	2797.15	2.8	0.35	0.35	2578
1104613	40	32	46	0.133018	0.490000	Intel-32t-2s	GUPDATE_REFINEMENT	19200	325	8	3.57538	350	6329.65	2.8	0.35	0.35	5952
1104613	40	32	46	0.064904	0.430000	Intel-32t-2s	GSTOP_REFINEMENT	19200	534	13	8.92884	350	2797.15	2.8	0.35	0.35	2578
1104613	40	32	46	0.133956	0.490000	Intel-32t-2s	GUPDATE_REFINEMENT	19200	325	8	3.57538	350	6329.65	2.8	0.35	0.35	5952
1104613	40	32	46	0.131008	0.480000	Intel-32t-2s	G	19200	418	7	3.5	350	6492.05	2.8	0.35	0.35	5952
1104613	40	32	46	0.130633	0.480000	Intel-32t-2s	GUPDATE	19200	418	8	3.73206	350	6498.7	2.8	0.35	0.35	5952
1104613	40	32	46	0.061625	0.420000	Intel-32t-2s	GSTOP	19200	583	14	9.25043	350	2847.7	2.8	0.35	0.35	2574
1104613	40	32	46	0.076995	0.450000	Intel-32t-2s	GSTOP_REFINEMENT	19200	534	13	8.92884	350	2797.15	2.8	0.35	0.35	2578
1104613	40	32	46	0.133523	0.480000	Intel-32t-2s	GUPDATE_REFINEMENT	19200	325	8	3.57538	350	6329.65	2.8	0.35	0.35	5952
1104613	40	32	46	0.131986	0.490000	Intel-32t-2s	G	19200	418	7	3.5	350	6492.05	2.8	0.35	0.35	5952
1104613	40	32	47	0.129685	0.480000	Intel-32t-2s	G	19200	409	9	3.63325	350	6423.3	2.8	0.35	0.35	5899
1104613	40	32	4	0.040306	0.520000	Intel-32t-2s	GSTOP_REFINEMENT	19200	3086	37	21.0651	350	2241.2	2.8	0.35	0.35	1096
1104613	40	32	47	0.126181	0.480000	Intel-32t-2s	GUPDATE	19200	409	8	3.72127	350	6319.15	2.8	0.35	0.35	5805
1104613	40	32	47	0.060333	0.420000	Intel-32t-2s	GSTOP	19200	575	13	8.89913	350	2680.4	2.8	0.35	0.35	2418
1104613	40	32	47	0.125764	0.470000	Intel-32t-2s	GUPDATE	19200	409	8	3.72127	350	6319.15	2.8	0.35	0.35	5805
1104613	40	32	47	0.059290	0.430000	Intel-32t-2s	GSTOP	19200	575	13	8.89913	350	2680.4	2.8	0.35	0.35	2418
1104613	40	32	47	0.065254	0.430000	Intel-32t-2s	GSTOP_REFINEMENT	19200	537	13	8.63873	350	2640.5	2.8	0.35	0.35	2439
1104613	40	32	47	0.129600	0.480000	Intel-32t-2s	GUPDATE_REFINEMENT	19200	329	7	3.51064	350	6192.8	2.8	0.35	0.35	5805
1104613	40	32	47	0.060232	0.420000	Intel-32t-2s	GSTOP_REFINEMENT	19200	537	13	8.63873	350	2640.5	2.8	0.35	0.35	2439
1104613	40	32	47	0.131840	0.480000	Intel-32t-2s	GUPDATE_REFINEMENT	19200	329	7	3.51064	350	6192.8	2.8	0.35	0.35	5805
1104613	40	32	47	0.129255	0.480000	Intel-32t-2s	G	19200	409	9	3.63325	350	6423.3	2.8	0.35	0.35	5899
1104613	40	32	47	0.126875	0.480000	Intel-32t-2s	GUPDATE	19200	409	8	3.72127	350	6319.15	2.8	0.35	0.35	5805
1104613	40	32	47	0.062002	0.420000	Intel-32t-2s	GSTOP	19200	575	13	8.89913	350	2680.4	2.8	0.35	0.35	2418
1104613	40	32	47	0.064217	0.420000	Intel-32t-2s	GSTOP_REFINEMENT	19200	537	13	8.63873	350	2640.5	2.8	0.35	0.35	2439
1104613	40	32	47	0.129791	0.470000	Intel-32t-2s	GUPDATE_REFINEMENT	19200	329	7	3.51064	350	6192.8	2.8	0.35	0.35	5805
1104613	40	32	47	0.130684	0.490000	Intel-32t-2s	G	19200	409	9	3.63325	350	6423.3	2.8	0.35	0.35	5899
1104613	40	32	48	0.097670	0.450000	Intel-32t-2s	G	19200	400	13	6.055	350	4650	2.8	0.35	0.35	4272
1104613	40	32	4	0.040666	0.510000	Intel-32t-2s	GUPDATE_REFINEMENT	19200	3104	34	21.6314	350	2257.55	2.8	0.35	0.35	1076
1104613	40	32	48	0.094962	0.460000	Intel-32t-2s	GUPDATE	19200	400	15	6.6125	350	4455.2	2.8	0.35	0.35	4080
1104613	40	32	48	0.054571	0.420000	Intel-32t-2s	GSTOP	19200	446	14	9.08969	350	2068.9	2.8	0.35	0.35	1872
1104613	40	32	48	0.094556	0.450000	Intel-32t-2s	GUPDATE	19200	400	15	6.6125	350	4455.2	2.8	0.35	0.35	4080
1104613	40	32	48	0.056698	0.430000	Intel-32t-2s	GSTOP	19200	446	14	9.08969	350	2068.9	2.8	0.35	0.35	1872
1104613	40	32	48	0.053694	0.430000	Intel-32t-2s	GSTOP_REFINEMENT	19200	428	16	9.54907	350	2046	2.8	0.35	0.35	1880
1104613	40	32	48	0.096229	0.440000	Intel-32t-2s	GUPDATE_REFINEMENT	19200	346	14	6.59827	350	4368.4	2.8	0.35	0.35	4080
1104613	40	32	48	0.051519	0.420000	Intel-32t-2s	GSTOP_REFINEMENT	19200	428	16	9.54907	350	2046	2.8	0.35	0.35	1880
1104613	40	32	48	0.095977	0.450000	Intel-32t-2s	GUPDATE_REFINEMENT	19200	346	14	6.59827	350	4368.4	2.8	0.35	0.35	4080
1104613	40	32	48	0.096747	0.460000	Intel-32t-2s	G	19200	400	13	6.055	350	4650	2.8	0.35	0.35	4272
1104613	40	32	48	0.093837	0.460000	Intel-32t-2s	GUPDATE	19200	400	15	6.6125	350	4455.2	2.8	0.35	0.35	4080
1104613	40	32	48	0.054562	0.420000	Intel-32t-2s	GSTOP	19200	446	14	9.08969	350	2068.9	2.8	0.35	0.35	1872
1104613	40	32	48	0.053266	0.430000	Intel-32t-2s	GSTOP_REFINEMENT	19200	428	16	9.54907	350	2046	2.8	0.35	0.35	1880
1104613	40	32	48	0.095213	0.450000	Intel-32t-2s	GUPDATE_REFINEMENT	19200	346	14	6.59827	350	4368.4	2.8	0.35	0.35	4080
1104613	40	32	48	0.098185	0.460000	Intel-32t-2s	G	19200	400	13	6.055	350	4650	2.8	0.35	0.35	4272
1104613	40	32	49	0.095713	0.460000	Intel-32t-2s	G	19200	392	13	6.31378	350	4725.05	2.8	0.35	0.35	4353
1104613	40	32	4	0.064595	1.040000	Intel-32t-2s	G	19200	4800	60	46.1	350	3410.95	2.8	0.35	0.35	672
1104613	40	32	49	0.090211	0.440000	Intel-32t-2s	GUPDATE	19200	392	13	5.95918	350	4468.85	2.8	0.35	0.35	4108
1104613	40	32	49	0.050598	0.420000	Intel-32t-2s	GSTOP	19200	417	15	10.5324	350	2067.65	2.8	0.35	0.35	1898
1104613	40	32	49	0.090659	0.440000	Intel-32t-2s	GUPDATE	19200	392	13	5.95918	350	4468.85	2.8	0.35	0.35	4108
1104613	40	32	49	0.049184	0.420000	Intel-32t-2s	GSTOP	19200	417	15	10.5324	350	2067.65	2.8	0.35	0.35	1898
1104613	40	32	49	0.053484	0.430000	Intel-32t-2s	GSTOP_REFINEMENT	19200	404	16	11.2426	350	2041.95	2.8	0.35	0.35	1898
1104613	40	32	49	0.094367	0.440000	Intel-32t-2s	GUPDATE_REFINEMENT	19200	325	12	5.96923	350	4357.55	2.8	0.35	0.35	4108
1104613	40	32	49	0.052958	0.430000	Intel-32t-2s	GSTOP_REFINEMENT	19200	404	16	11.2426	350	2041.95	2.8	0.35	0.35	1898
1104613	40	32	49	0.095888	0.450000	Intel-32t-2s	GUPDATE_REFINEMENT	19200	325	12	5.96923	350	4357.55	2.8	0.35	0.35	4108
1104613	40	32	49	0.096703	0.450000	Intel-32t-2s	G	19200	392	13	6.31378	350	4725.05	2.8	0.35	0.35	4353
1104613	40	32	49	0.091941	0.450000	Intel-32t-2s	GUPDATE	19200	392	13	5.95918	350	4468.85	2.8	0.35	0.35	4108
1104613	40	32	49	0.051671	0.430000	Intel-32t-2s	GSTOP	19200	417	15	10.5324	350	2067.65	2.8	0.35	0.35	1898
1104613	40	32	49	0.050767	0.420000	Intel-32t-2s	GSTOP_REFINEMENT	19200	404	16	11.2426	350	2041.95	2.8	0.35	0.35	1898
1104613	40	32	49	0.096454	0.440000	Intel-32t-2s	GUPDATE_REFINEMENT	19200	325	12	5.96923	350	4357.55	2.8	0.35	0.35	4108
1104613	40	32	49	0.096480	0.460000	Intel-32t-2s	G	19200	392	13	6.31378	350	4725.05	2.8	0.35	0.35	4353
1104613	40	32	5	0.053592	0.550000	Intel-32t-2s	G	19200	3840	23	14.6352	350	3107.25	2.8	0.35	0.35	1480
1104613	40	32	50	0.125548	0.480000	Intel-32t-2s	G	19200	384	7	3.74219	350	6171.8	2.8	0.35	0.35	5700
1104613	40	32	5	0.052939	0.560000	Intel-32t-2s	GUPDATE	19200	3840	25	14.9432	350	3133.9	2.8	0.35	0.35	1475
1104613	40	32	50	0.121716	0.470000	Intel-32t-2s	GUPDATE	19200	384	8	3.81771	350	6065.85	2.8	0.35	0.35	5600
1104613	40	32	50	0.078509	0.440000	Intel-32t-2s	GSTOP	19200	571	10	7.10683	350	3409.95	2.8	0.35	0.35	3117
1104613	40	32	50	0.122272	0.470000	Intel-32t-2s	GUPDATE	19200	384	8	3.81771	350	6065.85	2.8	0.35	0.35	5600
1104613	40	32	50	0.077282	0.430000	Intel-32t-2s	GSTOP	19200	571	10	7.10683	350	3409.95	2.8	0.35	0.35	3117
1104613	40	32	50	0.078835	0.450000	Intel-32t-2s	GSTOP_REFINEMENT	19200	549	10	6.82696	350	3400.8	2.8	0.35	0.35	3137
1104613	40	32	50	0.124788	0.480000	Intel-32t-2s	GUPDATE_REFINEMENT	19200	312	7	3.71795	350	5933.9	2.8	0.35	0.35	5600
1104613	40	32	50	0.077729	0.440000	Intel-32t-2s	GSTOP_REFINEMENT	19200	549	10	6.82696	350	3400.8	2.8	0.35	0.35	3137
1104613	40	32	50	0.126556	0.480000	Intel-32t-2s	GUPDATE_REFINEMENT	19200	312	7	3.71795	350	5933.9	2.8	0.35	0.35	5600
1104613	40	32	50	0.123715	0.480000	Intel-32t-2s	G	19200	384	7	3.74219	350	6171.8	2.8	0.35	0.35	5700
1104613	40	32	50	0.121439	0.480000	Intel-32t-2s	GUPDATE	19200	384	8	3.81771	350	6065.85	2.8	0.35	0.35	5600
1104613	40	32	50	0.073703	0.430000	Intel-32t-2s	GSTOP	19200	571	10	7.10683	350	3409.95	2.8	0.35	0.35	3117
1104613	40	32	50	0.077307	0.440000	Intel-32t-2s	GSTOP_REFINEMENT	19200	549	10	6.82696	350	3400.8	2.8	0.35	0.35	3137
1104613	40	32	50	0.125543	0.470000	Intel-32t-2s	GUPDATE_REFINEMENT	19200	312	7	3.71795	350	5933.9	2.8	0.35	0.35	5600
1104613	40	32	50	0.124622	0.480000	Intel-32t-2s	G	19200	384	7	3.74219	350	6171.8	2.8	0.35	0.35	5700
1104613	40	32	51	0.155627	0.500000	Intel-32t-2s	G	19200	377	6	3.02387	350	7740.8	2.8	0.35	0.35	7164
1104613	40	32	5	0.059789	1.010000	Intel-32t-2s	GSTOP	19200	5382	34	26.0912	350	3870.85	2.8	0.35	0.35	887
1104613	40	32	5	0.053922	0.560000	Intel-32t-2s	GUPDATE	19200	3840	25	14.9432	350	3133.9	2.8	0.35	0.35	1475
1104613	40	32	51	0.138716	0.490000	Intel-32t-2s	GUPDATE	19200	377	7	3.33687	350	6808.7	2.8	0.35	0.35	6297
1104613	40	32	5	0.044848	0.670000	Intel-32t-2s	GSTOP	19200	5382	34	26.0912	350	3870.85	2.8	0.35	0.35	887
1104613	40	32	51	0.070113	0.440000	Intel-32t-2s	GSTOP	19200	580	13	7.90172	350	3140.9	2.8	0.35	0.35	2849
1104613	40	32	51	0.137586	0.490000	Intel-32t-2s	GUPDATE	19200	377	7	3.33687	350	6808.7	2.8	0.35	0.35	6297
1104613	40	32	51	0.069378	0.440000	Intel-32t-2s	GSTOP	19200	580	13	7.90172	350	3140.9	2.8	0.35	0.35	2849
1104613	40	32	51	0.071976	0.440000	Intel-32t-2s	GSTOP_REFINEMENT	19200	527	12	7.82163	350	3091.35	2.8	0.35	0.35	2851
1104613	40	32	51	0.140351	0.490000	Intel-32t-2s	GUPDATE_REFINEMENT	19200	300	8	3.44333	350	6657.5	2.8	0.35	0.35	6297
1104613	40	32	5	0.062236	0.940000	Intel-32t-2s	GSTOP_REFINEMENT	19200	4819	35	23.8035	350	3476.25	2.8	0.35	0.35	1065
1104613	40	32	51	0.072627	0.440000	Intel-32t-2s	GSTOP_REFINEMENT	19200	527	12	7.82163	350	3091.35	2.8	0.35	0.35	2851
1104613	40	32	5	0.058513	0.550000	Intel-32t-2s	GUPDATE_REFINEMENT	19200	2996	20	12.8328	350	2675.85	2.8	0.35	0.35	1675
1104613	40	32	51	0.143362	0.490000	Intel-32t-2s	GUPDATE_REFINEMENT	19200	300	8	3.44333	350	6657.5	2.8	0.35	0.35	6297
1104613	40	32	51	0.157363	0.500000	Intel-32t-2s	G	19200	377	6	3.02387	350	7740.8	2.8	0.35	0.35	7164
1104613	40	32	51	0.137166	0.480000	Intel-32t-2s	GUPDATE	19200	377	7	3.33687	350	6808.7	2.8	0.35	0.35	6297
1104613	40	32	51	0.068788	0.440000	Intel-32t-2s	GSTOP	19200	580	13	7.90172	350	3140.9	2.8	0.35	0.35	2849
1104613	40	32	51	0.068776	0.430000	Intel-32t-2s	GSTOP_REFINEMENT	19200	527	12	7.82163	350	3091.35	2.8	0.35	0.35	2851
1104613	40	32	51	0.140009	0.480000	Intel-32t-2s	GUPDATE_REFINEMENT	19200	300	8	3.44333	350	6657.5	2.8	0.35	0.35	6297
1104613	40	32	51	0.155786	0.510000	Intel-32t-2s	G	19200	377	6	3.02387	350	7740.8	2.8	0.35	0.35	7164
1104613	40	32	52	0.134915	0.490000	Intel-32t-2s	G	19200	370	7	3.4	350	6695.25	2.8	0.35	0.35	6200
1104613	40	32	5	0.042099	0.530000	Intel-32t-2s	GSTOP_REFINEMENT	19200	4819	35	23.8035	350	3476.25	2.8	0.35	0.35	1065
1104613	40	32	52	0.134746	0.490000	Intel-32t-2s	GUPDATE	19200	370	6	3.42432	350	6757.75	2.8	0.35	0.35	6252
1104613	40	32	52	0.068356	0.430000	Intel-32t-2s	GSTOP	19200	560	13	8.58214	350	3027.4	2.8	0.35	0.35	2768
1104613	40	32	52	0.135432	0.490000	Intel-32t-2s	GUPDATE	19200	370	6	3.42432	350	6757.75	2.8	0.35	0.35	6252
1104613	40	32	52	0.065785	0.430000	Intel-32t-2s	GSTOP	19200	560	13	8.58214	350	3027.4	2.8	0.35	0.35	2768
1104613	40	32	52	0.067922	0.440000	Intel-32t-2s	GSTOP_REFINEMENT	19200	521	12	8.1881	350	2986.25	2.8	0.35	0.35	2771
1104613	40	32	52	0.140490	0.480000	Intel-32t-2s	GUPDATE_REFINEMENT	19200	292	6	3.36301	350	6612.5	2.8	0.35	0.35	6252
1104613	40	32	52	0.070889	0.430000	Intel-32t-2s	GSTOP_REFINEMENT	19200	521	12	8.1881	350	2986.25	2.8	0.35	0.35	2771
1104613	40	32	52	0.140813	0.490000	Intel-32t-2s	GUPDATE_REFINEMENT	19200	292	6	3.36301	350	6612.5	2.8	0.35	0.35	6252
1104613	40	32	52	0.138506	0.500000	Intel-32t-2s	G	19200	370	7	3.4	350	6695.25	2.8	0.35	0.35	6200
1104613	40	32	52	0.135239	0.480000	Intel-32t-2s	GUPDATE	19200	370	6	3.42432	350	6757.75	2.8	0.35	0.35	6252
1104613	40	32	52	0.064676	0.420000	Intel-32t-2s	GSTOP	19200	560	13	8.58214	350	3027.4	2.8	0.35	0.35	2768
1104613	40	32	52	0.068163	0.430000	Intel-32t-2s	GSTOP_REFINEMENT	19200	521	12	8.1881	350	2986.25	2.8	0.35	0.35	2771
1104613	40	32	52	0.140577	0.480000	Intel-32t-2s	GUPDATE_REFINEMENT	19200	292	6	3.36301	350	6612.5	2.8	0.35	0.35	6252
1104613	40	32	52	0.138473	0.490000	Intel-32t-2s	G	19200	370	7	3.4	350	6695.25	2.8	0.35	0.35	6200
1104613	40	32	53	0.143724	0.490000	Intel-32t-2s	G	19200	363	7	3.25895	350	7109.95	2.8	0.35	0.35	6586
1104613	40	32	5	0.054748	0.490000	Intel-32t-2s	GUPDATE_REFINEMENT	19200	2996	20	12.8328	350	2675.85	2.8	0.35	0.35	1675
1104613	40	32	53	0.129205	0.480000	Intel-32t-2s	GUPDATE	19200	363	6	3.61433	350	6363.2	2.8	0.35	0.35	5897
1104613	40	32	53	0.069546	0.430000	Intel-32t-2s	GSTOP	19200	482	11	7.91494	350	3079	2.8	0.35	0.35	2822
1104613	40	32	53	0.129209	0.480000	Intel-32t-2s	GUPDATE	19200	363	6	3.61433	350	6363.2	2.8	0.35	0.35	5897
1104613	40	32	53	0.068662	0.440000	Intel-32t-2s	GSTOP	19200	482	11	7.91494	350	3079	2.8	0.35	0.35	2822
1104613	40	32	53	0.072436	0.430000	Intel-32t-2s	GSTOP_REFINEMENT	19200	447	11	7.64206	350	3041.2	2.8	0.35	0.35	2825
1104613	40	32	53	0.132313	0.480000	Intel-32t-2s	GUPDATE_REFINEMENT	19200	284	6	3.46127	350	6214.8	2.8	0.35	0.35	5897
1104613	40	32	53	0.069713	0.420000	Intel-32t-2s	GSTOP_REFINEMENT	19200	447	11	7.64206	350	3041.2	2.8	0.35	0.35	2825
1104613	40	32	53	0.131053	0.480000	Intel-32t-2s	GUPDATE_REFINEMENT	19200	284	6	3.46127	350	6214.8	2.8	0.35	0.35	5897
1104613	40	32	53	0.143959	0.490000	Intel-32t-2s	G	19200	363	7	3.25895	350	7109.95	2.8	0.35	0.35	6586
1104613	40	32	53	0.129883	0.480000	Intel-32t-2s	GUPDATE	19200	363	6	3.61433	350	6363.2	2.8	0.35	0.35	5897
1104613	40	32	53	0.065281	0.420000	Intel-32t-2s	GSTOP	19200	482	11	7.91494	350	3079	2.8	0.35	0.35	2822
1104613	40	32	53	0.071982	0.440000	Intel-32t-2s	GSTOP_REFINEMENT	19200	447	11	7.64206	350	3041.2	2.8	0.35	0.35	2825
1104613	40	32	53	0.130715	0.480000	Intel-32t-2s	GUPDATE_REFINEMENT	19200	284	6	3.46127	350	6214.8	2.8	0.35	0.35	5897
1104613	40	32	53	0.144035	0.490000	Intel-32t-2s	G	19200	363	7	3.25895	350	7109.95	2.8	0.35	0.35	6586
1104613	40	32	54	0.135315	0.480000	Intel-32t-2s	G	19200	356	7	3.51124	350	6782.95	2.8	0.35	0.35	6294
1104613	40	32	5	0.050236	0.520000	Intel-32t-2s	G	19200	3840	23	14.6352	350	3107.25	2.8	0.35	0.35	1480
1104613	40	32	54	0.125772	0.490000	Intel-32t-2s	GUPDATE	19200	356	7	3.69663	350	6026	2.8	0.35	0.35	5592
1104613	40	32	54	0.064270	0.420000	Intel-32t-2s	GSTOP	19200	481	12	8.49688	350	2985.05	2.8	0.35	0.35	2744
1104613	40	32	54	0.124424	0.470000	Intel-32t-2s	GUPDATE	19200	356	7	3.69663	350	6026	2.8	0.35	0.35	5592
1104613	40	32	54	0.063828	0.430000	Intel-32t-2s	GSTOP	19200	481	12	8.49688	350	2985.05	2.8	0.35	0.35	2744
1104613	40	32	54	0.067713	0.430000	Intel-32t-2s	GSTOP_REFINEMENT	19200	438	12	8.21918	350	2940	2.8	0.35	0.35	2757
1104613	40	32	54	0.125233	0.470000	Intel-32t-2s	GUPDATE_REFINEMENT	19200	293	7	3.66212	350	5915.75	2.8	0.35	0.35	5592
1104613	40	32	54	0.068744	0.420000	Intel-32t-2s	GSTOP_REFINEMENT	19200	438	12	8.21918	350	2940	2.8	0.35	0.35	2757
1104613	40	32	54	0.126409	0.480000	Intel-32t-2s	GUPDATE_REFINEMENT	19200	293	7	3.66212	350	5915.75	2.8	0.35	0.35	5592
1104613	40	32	54	0.136085	0.480000	Intel-32t-2s	G	19200	356	7	3.51124	350	6782.95	2.8	0.35	0.35	6294
1104613	40	32	54	0.125959	0.490000	Intel-32t-2s	GUPDATE	19200	356	7	3.69663	350	6026	2.8	0.35	0.35	5592
1104613	40	32	54	0.066064	0.430000	Intel-32t-2s	GSTOP	19200	481	12	8.49688	350	2985.05	2.8	0.35	0.35	2744
1104613	40	32	54	0.066298	0.430000	Intel-32t-2s	GSTOP_REFINEMENT	19200	438	12	8.21918	350	2940	2.8	0.35	0.35	2757
1104613	40	32	54	0.128521	0.480000	Intel-32t-2s	GUPDATE_REFINEMENT	19200	293	7	3.66212	350	5915.75	2.8	0.35	0.35	5592
1104613	40	32	54	0.134388	0.490000	Intel-32t-2s	G	19200	356	7	3.51124	350	6782.95	2.8	0.35	0.35	6294
1104613	40	32	55	0.127653	0.480000	Intel-32t-2s	G	19200	350	7	3.56857	350	6270.05	2.8	0.35	0.35	5835
1104613	40	32	5	0.069699	0.650000	Intel-32t-2s	GUPDATE	19200	3840	25	14.9432	350	3133.9	2.8	0.35	0.35	1475
1104613	40	32	55	0.130436	0.480000	Intel-32t-2s	GUPDATE	19200	350	7	3.56857	350	6462.7	2.8	0.35	0.35	6000
1104613	40	32	55	0.063043	0.420000	Intel-32t-2s	GSTOP	19200	516	11	7.99612	350	2658.15	2.8	0.35	0.35	2411
1104613	40	32	55	0.130608	0.470000	Intel-32t-2s	GUPDATE	19200	350	7	3.56857	350	6462.7	2.8	0.35	0.35	6000
1104613	40	32	55	0.062037	0.420000	Intel-32t-2s	GSTOP	19200	516	11	7.99612	350	2658.15	2.8	0.35	0.35	2411
1104613	40	32	55	0.061302	0.420000	Intel-32t-2s	GSTOP_REFINEMENT	19200	489	11	7.88957	350	2628.6	2.8	0.35	0.35	2429
1104613	40	32	55	0.134933	0.480000	Intel-32t-2s	GUPDATE_REFINEMENT	19200	275	8	3.44727	350	6329.35	2.8	0.35	0.35	6000
1104613	40	32	55	0.064061	0.440000	Intel-32t-2s	GSTOP_REFINEMENT	19200	489	11	7.88957	350	2628.6	2.8	0.35	0.35	2429
1104613	40	32	55	0.136641	0.490000	Intel-32t-2s	GUPDATE_REFINEMENT	19200	275	8	3.44727	350	6329.35	2.8	0.35	0.35	6000
1104613	40	32	55	0.129080	0.480000	Intel-32t-2s	G	19200	350	7	3.56857	350	6270.05	2.8	0.35	0.35	5835
1104613	40	32	55	0.134553	0.490000	Intel-32t-2s	GUPDATE	19200	350	7	3.56857	350	6462.7	2.8	0.35	0.35	6000
1104613	40	32	55	0.061855	0.420000	Intel-32t-2s	GSTOP	19200	516	11	7.99612	350	2658.15	2.8	0.35	0.35	2411
1104613	40	32	55	0.069249	0.440000	Intel-32t-2s	GSTOP_REFINEMENT	19200	489	11	7.88957	350	2628.6	2.8	0.35	0.35	2429
1104613	40	32	55	0.135403	0.470000	Intel-32t-2s	GUPDATE_REFINEMENT	19200	275	8	3.44727	350	6329.35	2.8	0.35	0.35	6000
1104613	40	32	55	0.127980	0.480000	Intel-32t-2s	G	19200	350	7	3.56857	350	6270.05	2.8	0.35	0.35	5835
1104613	40	32	56	0.094474	0.460000	Intel-32t-2s	G	19200	343	15	6.41108	350	4462.55	2.8	0.35	0.35	4136
1104613	40	32	5	0.073563	0.990000	Intel-32t-2s	GSTOP	19200	5382	34	26.0912	350	3870.85	2.8	0.35	0.35	887
1104613	40	32	56	0.096063	0.450000	Intel-32t-2s	GUPDATE	19200	343	15	6.25364	350	4573.15	2.8	0.35	0.35	4248
1104613	40	32	56	0.051920	0.430000	Intel-32t-2s	GSTOP	19200	360	16	11.4028	350	2038.85	2.8	0.35	0.35	1888
1104613	40	32	56	0.096141	0.450000	Intel-32t-2s	GUPDATE	19200	343	15	6.25364	350	4573.15	2.8	0.35	0.35	4248
1104613	40	32	56	0.054354	0.430000	Intel-32t-2s	GSTOP	19200	360	16	11.4028	350	2038.85	2.8	0.35	0.35	1888
1104613	40	32	56	0.054614	0.440000	Intel-32t-2s	GSTOP_REFINEMENT	19200	352	15	11.0682	350	2028.35	2.8	0.35	0.35	1888
1104613	40	32	56	0.099887	0.460000	Intel-32t-2s	GUPDATE_REFINEMENT	19200	294	13	6.18027	350	4496.15	2.8	0.35	0.35	4248
1104613	40	32	56	0.051794	0.420000	Intel-32t-2s	GSTOP_REFINEMENT	19200	352	15	11.0682	350	2028.35	2.8	0.35	0.35	1888
1104613	40	32	56	0.102022	0.460000	Intel-32t-2s	GUPDATE_REFINEMENT	19200	294	13	6.18027	350	4496.15	2.8	0.35	0.35	4248
1104613	40	32	56	0.094226	0.450000	Intel-32t-2s	G	19200	343	15	6.41108	350	4462.55	2.8	0.35	0.35	4136
1104613	40	32	56	0.095385	0.460000	Intel-32t-2s	GUPDATE	19200	343	15	6.25364	350	4573.15	2.8	0.35	0.35	4248
1104613	40	32	56	0.055643	0.430000	Intel-32t-2s	GSTOP	19200	360	16	11.4028	350	2038.85	2.8	0.35	0.35	1888
1104613	40	32	56	0.053584	0.430000	Intel-32t-2s	GSTOP_REFINEMENT	19200	352	15	11.0682	350	2028.35	2.8	0.35	0.35	1888
1104613	40	32	56	0.098074	0.450000	Intel-32t-2s	GUPDATE_REFINEMENT	19200	294	13	6.18027	350	4496.15	2.8	0.35	0.35	4248
1104613	40	32	56	0.095325	0.450000	Intel-32t-2s	G	19200	343	15	6.41108	350	4462.55	2.8	0.35	0.35	4136
1104613	40	32	57	0.139025	0.490000	Intel-32t-2s	G	19200	337	6	3.22255	350	6900.3	2.8	0.35	0.35	6432
1104613	40	32	5	0.057237	0.850000	Intel-32t-2s	GSTOP_REFINEMENT	19200	4819	35	23.8035	350	3476.25	2.8	0.35	0.35	1065
1104613	40	32	57	0.124041	0.470000	Intel-32t-2s	GUPDATE	19200	337	7	3.76558	350	6212.05	2.8	0.35	0.35	5805
1104613	40	32	57	0.088656	0.440000	Intel-32t-2s	GSTOP	19200	479	9	5.82463	350	4099.2	2.8	0.35	0.35	3763
1104613	40	32	57	0.124332	0.470000	Intel-32t-2s	GUPDATE	19200	337	7	3.76558	350	6212.05	2.8	0.35	0.35	5805
1104613	40	32	57	0.086536	0.440000	Intel-32t-2s	GSTOP	19200	479	9	5.82463	350	4099.2	2.8	0.35	0.35	3763
1104613	40	32	57	0.097412	0.440000	Intel-32t-2s	GSTOP_REFINEMENT	19200	421	8	5.91449	350	4031.5	2.8	0.35	0.35	3776
1104613	40	32	57	0.127827	0.480000	Intel-32t-2s	GUPDATE_REFINEMENT	19200	259	7	3.79151	350	6082.2	2.8	0.35	0.35	5805
1104613	40	32	57	0.085702	0.430000	Intel-32t-2s	GSTOP_REFINEMENT	19200	421	8	5.91449	350	4031.5	2.8	0.35	0.35	3776
1104613	40	32	57	0.130711	0.470000	Intel-32t-2s	GUPDATE_REFINEMENT	19200	259	7	3.79151	350	6082.2	2.8	0.35	0.35	5805
1104613	40	32	57	0.138820	0.490000	Intel-32t-2s	G	19200	337	6	3.22255	350	6900.3	2.8	0.35	0.35	6432
1104613	40	32	57	0.126260	0.470000	Intel-32t-2s	GUPDATE	19200	337	7	3.76558	350	6212.05	2.8	0.35	0.35	5805
1104613	40	32	57	0.086741	0.440000	Intel-32t-2s	GSTOP	19200	479	9	5.82463	350	4099.2	2.8	0.35	0.35	3763
1104613	40	32	57	0.085316	0.450000	Intel-32t-2s	GSTOP_REFINEMENT	19200	421	8	5.91449	350	4031.5	2.8	0.35	0.35	3776
1104613	40	32	57	0.128186	0.480000	Intel-32t-2s	GUPDATE_REFINEMENT	19200	259	7	3.79151	350	6082.2	2.8	0.35	0.35	5805
1104613	40	32	57	0.139031	0.480000	Intel-32t-2s	G	19200	337	6	3.22255	350	6900.3	2.8	0.35	0.35	6432
1104613	40	32	58	0.158490	0.500000	Intel-32t-2s	G	19200	332	6	2.93072	350	7758.1	2.8	0.35	0.35	7252
1104613	40	32	5	0.054758	0.480000	Intel-32t-2s	GUPDATE_REFINEMENT	19200	2996	20	12.8328	350	2675.85	2.8	0.35	0.35	1675
1104613	40	32	58	0.138810	0.480000	Intel-32t-2s	GUPDATE	19200	332	7	3.28614	350	6775.5	2.8	0.35	0.35	6324
1104613	40	32	58	0.070316	0.440000	Intel-32t-2s	GSTOP	19200	525	11	7.47619	350	3226.4	2.8	0.35	0.35	2950
1104613	40	32	58	0.139097	0.480000	Intel-32t-2s	GUPDATE	19200	332	7	3.28614	350	6775.5	2.8	0.35	0.35	6324
1104613	40	32	58	0.073260	0.430000	Intel-32t-2s	GSTOP	19200	525	11	7.47619	350	3226.4	2.8	0.35	0.35	2950
1104613	40	32	58	0.071863	0.440000	Intel-32t-2s	GSTOP_REFINEMENT	19200	490	11	7.27347	350	3200.7	2.8	0.35	0.35	2972
1104613	40	32	58	0.141565	0.500000	Intel-32t-2s	GUPDATE_REFINEMENT	19200	268	7	3.31716	350	6654.05	2.8	0.35	0.35	6324
1104613	40	32	58	0.071620	0.440000	Intel-32t-2s	GSTOP_REFINEMENT	19200	490	11	7.27347	350	3200.7	2.8	0.35	0.35	2972
1104613	40	32	58	0.141539	0.500000	Intel-32t-2s	GUPDATE_REFINEMENT	19200	268	7	3.31716	350	6654.05	2.8	0.35	0.35	6324
1104613	40	32	58	0.156257	0.500000	Intel-32t-2s	G	19200	332	6	2.93072	350	7758.1	2.8	0.35	0.35	7252
1104613	40	32	58	0.139553	0.480000	Intel-32t-2s	GUPDATE	19200	332	7	3.28614	350	6775.5	2.8	0.35	0.35	6324
1104613	40	32	58	0.067732	0.440000	Intel-32t-2s	GSTOP	19200	525	11	7.47619	350	3226.4	2.8	0.35	0.35	2950
1104613	40	32	58	0.071675	0.430000	Intel-32t-2s	GSTOP_REFINEMENT	19200	490	11	7.27347	350	3200.7	2.8	0.35	0.35	2972
1104613	40	32	58	0.141045	0.490000	Intel-32t-2s	GUPDATE_REFINEMENT	19200	268	7	3.31716	350	6654.05	2.8	0.35	0.35	6324
1104613	40	32	58	0.155989	0.500000	Intel-32t-2s	G	19200	332	6	2.93072	350	7758.1	2.8	0.35	0.35	7252
1104613	40	32	59	0.153122	0.510000	Intel-32t-2s	G	19200	326	6	3.06442	350	7407.85	2.8	0.35	0.35	6928
1104613	40	32	5	0.049914	0.500000	Intel-32t-2s	G	19200	3840	23	14.6352	350	3107.25	2.8	0.35	0.35	1480
1104613	40	32	59	0.141929	0.490000	Intel-32t-2s	GUPDATE	19200	326	6	3.30675	350	6985.4	2.8	0.35	0.35	6515
1104613	40	32	59	0.070728	0.430000	Intel-32t-2s	GSTOP	19200	486	13	7.89712	350	3197.45	2.8	0.35	0.35	2965
1104613	40	32	59	0.142987	0.490000	Intel-32t-2s	GUPDATE	19200	326	6	3.30675	350	6985.4	2.8	0.35	0.35	6515
1104613	40	32	59	0.073703	0.440000	Intel-32t-2s	GSTOP	19200	486	13	7.89712	350	3197.45	2.8	0.35	0.35	2965
1104613	40	32	59	0.071544	0.430000	Intel-32t-2s	GSTOP_REFINEMENT	19200	444	13	7.47072	350	3150.45	2.8	0.35	0.35	2965
1104613	40	32	59	0.143908	0.480000	Intel-32t-2s	GUPDATE_REFINEMENT	19200	260	6	3.20385	350	6848.9	2.8	0.35	0.35	6515
1104613	40	32	59	0.073177	0.440000	Intel-32t-2s	GSTOP_REFINEMENT	19200	444	13	7.47072	350	3150.45	2.8	0.35	0.35	2965
1104613	40	32	59	0.146245	0.500000	Intel-32t-2s	GUPDATE_REFINEMENT	19200	260	6	3.20385	350	6848.9	2.8	0.35	0.35	6515
1104613	40	32	59	0.150382	0.500000	Intel-32t-2s	G	19200	326	6	3.06442	350	7407.85	2.8	0.35	0.35	6928
1104613	40	32	59	0.143316	0.490000	Intel-32t-2s	GUPDATE	19200	326	6	3.30675	350	6985.4	2.8	0.35	0.35	6515
1104613	40	32	59	0.071238	0.440000	Intel-32t-2s	GSTOP	19200	486	13	7.89712	350	3197.45	2.8	0.35	0.35	2965
1104613	40	32	59	0.072860	0.430000	Intel-32t-2s	GSTOP_REFINEMENT	19200	444	13	7.47072	350	3150.45	2.8	0.35	0.35	2965
1104613	40	32	59	0.144343	0.480000	Intel-32t-2s	GUPDATE_REFINEMENT	19200	260	6	3.20385	350	6848.9	2.8	0.35	0.35	6515
1104613	40	32	59	0.150468	0.490000	Intel-32t-2s	G	19200	326	6	3.06442	350	7407.85	2.8	0.35	0.35	6928
1104613	40	32	6	0.048762	0.510000	Intel-32t-2s	G	19200	3200	40	28.2284	350	2455.05	2.8	0.35	0.35	852
1104613	40	32	60	0.145619	0.490000	Intel-32t-2s	G	19200	320	7	3.2125	350	7100.65	2.8	0.35	0.35	6660
1104613	40	32	6	0.036320	0.480000	Intel-32t-2s	GUPDATE	19200	3200	42	30.2469	350	2334.05	2.8	0.35	0.35	768
1104613	40	32	60	0.137264	0.480000	Intel-32t-2s	GUPDATE	19200	320	7	3.45	350	6730.5	2.8	0.35	0.35	6300
1104613	40	32	60	0.065818	0.440000	Intel-32t-2s	GSTOP	19200	424	14	8.29245	350	2810.5	2.8	0.35	0.35	2602
1104613	40	32	60	0.137621	0.490000	Intel-32t-2s	GUPDATE	19200	320	7	3.45	350	6730.5	2.8	0.35	0.35	6300
1104613	40	32	60	0.062567	0.430000	Intel-32t-2s	GSTOP	19200	424	14	8.29245	350	2810.5	2.8	0.35	0.35	2602
1104613	40	32	60	0.063289	0.420000	Intel-32t-2s	GSTOP_REFINEMENT	19200	393	14	8.27226	350	2782.85	2.8	0.35	0.35	2611
1104613	40	32	60	0.137922	0.480000	Intel-32t-2s	GUPDATE_REFINEMENT	19200	253	7	3.47036	350	6610.8	2.8	0.35	0.35	6300
1104613	40	32	60	0.065709	0.430000	Intel-32t-2s	GSTOP_REFINEMENT	19200	393	14	8.27226	350	2782.85	2.8	0.35	0.35	2611
1104613	40	32	60	0.140131	0.490000	Intel-32t-2s	GUPDATE_REFINEMENT	19200	253	7	3.47036	350	6610.8	2.8	0.35	0.35	6300
1104613	40	32	60	0.145977	0.490000	Intel-32t-2s	G	19200	320	7	3.2125	350	7100.65	2.8	0.35	0.35	6660
1104613	40	32	60	0.136444	0.480000	Intel-32t-2s	GUPDATE	19200	320	7	3.45	350	6730.5	2.8	0.35	0.35	6300
1104613	40	32	60	0.063527	0.420000	Intel-32t-2s	GSTOP	19200	424	14	8.29245	350	2810.5	2.8	0.35	0.35	2602
1104613	40	32	60	0.064708	0.430000	Intel-32t-2s	GSTOP_REFINEMENT	19200	393	14	8.27226	350	2782.85	2.8	0.35	0.35	2611
1104613	40	32	60	0.139166	0.490000	Intel-32t-2s	GUPDATE_REFINEMENT	19200	253	7	3.47036	350	6610.8	2.8	0.35	0.35	6300
1104613	40	32	60	0.144800	0.490000	Intel-32t-2s	G	19200	320	7	3.2125	350	7100.65	2.8	0.35	0.35	6660
1104613	40	32	61	0.144186	0.480000	Intel-32t-2s	G	19200	315	7	3.18095	350	7213.8	2.8	0.35	0.35	6756
1104613	40	32	6	0.034714	0.480000	Intel-32t-2s	GSTOP	19200	3229	42	30.821	350	2349.25	2.8	0.35	0.35	738
1104613	40	32	6	0.035792	0.490000	Intel-32t-2s	GUPDATE	19200	3200	42	30.2469	350	2334.05	2.8	0.35	0.35	768
1104613	40	32	61	0.137501	0.480000	Intel-32t-2s	GUPDATE	19200	315	6	3.37143	350	6760.9	2.8	0.35	0.35	6329
1104613	40	32	6	0.041201	0.600000	Intel-32t-2s	GSTOP	19200	3229	42	30.821	350	2349.25	2.8	0.35	0.35	738
1104613	40	32	61	0.069262	0.440000	Intel-32t-2s	GSTOP	19200	437	13	8.11213	350	3024	2.8	0.35	0.35	2815
1104613	40	32	61	0.137773	0.490000	Intel-32t-2s	GUPDATE	19200	315	6	3.37143	350	6760.9	2.8	0.35	0.35	6329
1104613	40	32	61	0.069210	0.440000	Intel-32t-2s	GSTOP	19200	437	13	8.11213	350	3024	2.8	0.35	0.35	2815
1104613	40	32	61	0.068977	0.430000	Intel-32t-2s	GSTOP_REFINEMENT	19200	400	12	7.775	350	2990.25	2.8	0.35	0.35	2817
1104613	40	32	61	0.140114	0.480000	Intel-32t-2s	GUPDATE_REFINEMENT	19200	242	6	3.21901	350	6623.35	2.8	0.35	0.35	6329
1104613	40	32	6	0.038941	0.520000	Intel-32t-2s	GSTOP_REFINEMENT	19200	2579	39	23.5227	350	1917	2.8	0.35	0.35	1059
1104613	40	32	61	0.065345	0.430000	Intel-32t-2s	GSTOP_REFINEMENT	19200	400	12	7.775	350	2990.25	2.8	0.35	0.35	2817
1104613	40	32	6	0.037421	0.460000	Intel-32t-2s	GUPDATE_REFINEMENT	19200	2535	35	22.3049	350	1890.4	2.8	0.35	0.35	1056
1104613	40	32	61	0.141838	0.480000	Intel-32t-2s	GUPDATE_REFINEMENT	19200	242	6	3.21901	350	6623.35	2.8	0.35	0.35	6329
1104613	40	32	61	0.144524	0.490000	Intel-32t-2s	G	19200	315	7	3.18095	350	7213.8	2.8	0.35	0.35	6756
1104613	40	32	61	0.138193	0.490000	Intel-32t-2s	GUPDATE	19200	315	6	3.37143	350	6760.9	2.8	0.35	0.35	6329
1104613	40	32	61	0.067140	0.430000	Intel-32t-2s	GSTOP	19200	437	13	8.11213	350	3024	2.8	0.35	0.35	2815
1104613	40	32	61	0.074116	0.440000	Intel-32t-2s	GSTOP_REFINEMENT	19200	400	12	7.775	350	2990.25	2.8	0.35	0.35	2817
1104613	40	32	61	0.139737	0.480000	Intel-32t-2s	GUPDATE_REFINEMENT	19200	242	6	3.21901	350	6623.35	2.8	0.35	0.35	6329
1104613	40	32	61	0.143138	0.490000	Intel-32t-2s	G	19200	315	7	3.18095	350	7213.8	2.8	0.35	0.35	6756
1104613	40	32	62	0.145238	0.490000	Intel-32t-2s	G	19200	310	7	3.31935	350	7242.4	2.8	0.35	0.35	6800
1104613	40	32	6	0.040414	0.550000	Intel-32t-2s	GSTOP_REFINEMENT	19200	2579	39	23.5227	350	1917	2.8	0.35	0.35	1059
1104613	40	32	62	0.148992	0.500000	Intel-32t-2s	GUPDATE	19200	310	6	2.95484	350	7441.7	2.8	0.35	0.35	6986
1104613	40	32	62	0.218719	0.440000	Intel-32t-2s	GSTOP	19200	450	13	9.02889	350	2875.15	2.8	0.35	0.35	2660
1104613	40	32	62	0.151971	0.500000	Intel-32t-2s	GUPDATE	19200	310	6	2.95484	350	7441.7	2.8	0.35	0.35	6986
1104613	40	32	62	0.062855	0.430000	Intel-32t-2s	GSTOP	19200	450	13	9.02889	350	2875.15	2.8	0.35	0.35	2660
1104613	40	32	62	0.064675	0.440000	Intel-32t-2s	GSTOP_REFINEMENT	19200	416	13	8.39663	350	2832	2.8	0.35	0.35	2664
1104613	40	32	62	0.154246	0.500000	Intel-32t-2s	GUPDATE_REFINEMENT	19200	241	6	3.0249	350	7304.85	2.8	0.35	0.35	6986
1104613	40	32	62	0.066082	0.430000	Intel-32t-2s	GSTOP_REFINEMENT	19200	416	13	8.39663	350	2832	2.8	0.35	0.35	2664
1104613	40	32	62	0.152624	0.500000	Intel-32t-2s	GUPDATE_REFINEMENT	19200	241	6	3.0249	350	7304.85	2.8	0.35	0.35	6986
1104613	40	32	62	0.145525	0.500000	Intel-32t-2s	G	19200	310	7	3.31935	350	7242.4	2.8	0.35	0.35	6800
1104613	40	32	62	0.149503	0.490000	Intel-32t-2s	GUPDATE	19200	310	6	2.95484	350	7441.7	2.8	0.35	0.35	6986
1104613	40	32	62	0.064644	0.440000	Intel-32t-2s	GSTOP	19200	450	13	9.02889	350	2875.15	2.8	0.35	0.35	2660
1104613	40	32	62	0.067179	0.420000	Intel-32t-2s	GSTOP_REFINEMENT	19200	416	13	8.39663	350	2832	2.8	0.35	0.35	2664
1104613	40	32	62	0.151196	0.500000	Intel-32t-2s	GUPDATE_REFINEMENT	19200	241	6	3.0249	350	7304.85	2.8	0.35	0.35	6986
1104613	40	32	62	0.147294	0.490000	Intel-32t-2s	G	19200	310	7	3.31935	350	7242.4	2.8	0.35	0.35	6800
1104613	40	32	63	0.123235	0.470000	Intel-32t-2s	G	19200	305	9	3.91475	350	5896.85	2.8	0.35	0.35	5529
1104613	40	32	6	0.039272	0.470000	Intel-32t-2s	GUPDATE_REFINEMENT	19200	2535	35	22.3049	350	1890.4	2.8	0.35	0.35	1056
1104613	40	32	63	0.122716	0.480000	Intel-32t-2s	GUPDATE	19200	305	9	3.95082	350	5965.8	2.8	0.35	0.35	5592
1104613	40	32	63	0.058511	0.430000	Intel-32t-2s	GSTOP	19200	330	13	9.6	350	2378.5	2.8	0.35	0.35	2228
1104613	40	32	63	0.124169	0.480000	Intel-32t-2s	GUPDATE	19200	305	9	3.95082	350	5965.8	2.8	0.35	0.35	5592
1104613	40	32	63	0.093913	0.440000	Intel-32t-2s	GSTOP	19200	330	13	9.6	350	2378.5	2.8	0.35	0.35	2228
1104613	40	32	63	0.058768	0.440000	Intel-32t-2s	GSTOP_REFINEMENT	19200	323	13	9.6935	350	2363.45	2.8	0.35	0.35	2235
1104613	40	32	63	0.127195	0.480000	Intel-32t-2s	GUPDATE_REFINEMENT	19200	247	8	3.74899	350	5873.4	2.8	0.35	0.35	5592
1104613	40	32	63	0.059115	0.430000	Intel-32t-2s	GSTOP_REFINEMENT	19200	323	13	9.6935	350	2363.45	2.8	0.35	0.35	2235
1104613	40	32	63	0.127289	0.480000	Intel-32t-2s	GUPDATE_REFINEMENT	19200	247	8	3.74899	350	5873.4	2.8	0.35	0.35	5592
1104613	40	32	63	0.122166	0.470000	Intel-32t-2s	G	19200	305	9	3.91475	350	5896.85	2.8	0.35	0.35	5529
1104613	40	32	63	0.122192	0.470000	Intel-32t-2s	GUPDATE	19200	305	9	3.95082	350	5965.8	2.8	0.35	0.35	5592
1104613	40	32	63	0.066427	0.430000	Intel-32t-2s	GSTOP	19200	330	13	9.6	350	2378.5	2.8	0.35	0.35	2228
1104613	40	32	63	0.063840	0.430000	Intel-32t-2s	GSTOP_REFINEMENT	19200	323	13	9.6935	350	2363.45	2.8	0.35	0.35	2235
1104613	40	32	63	0.125245	0.470000	Intel-32t-2s	GUPDATE_REFINEMENT	19200	247	8	3.74899	350	5873.4	2.8	0.35	0.35	5592
1104613	40	32	63	0.122123	0.470000	Intel-32t-2s	G	19200	305	9	3.91475	350	5896.85	2.8	0.35	0.35	5529
1104613	40	32	64	0.050823	0.410000	Intel-32t-2s	G	19200	300	15	11.15	350	1986.55	2.8	0.35	0.35	1856
1104613	40	32	6	0.047282	0.730000	Intel-32t-2s	G	19200	3200	40	28.2284	350	2455.05	2.8	0.35	0.35	852
1104613	40	32	64	0.056514	0.440000	Intel-32t-2s	GUPDATE	19200	300	15	11.15	350	1987.25	2.8	0.35	0.35	1856
1104613	40	32	64	0.055326	0.430000	Intel-32t-2s	GSTOP	19200	300	15	11.15	350	1986.55	2.8	0.35	0.35	1856
1104613	40	32	64	0.052446	0.430000	Intel-32t-2s	GUPDATE	19200	300	15	11.15	350	1987.25	2.8	0.35	0.35	1856
1104613	40	32	64	0.053270	0.430000	Intel-32t-2s	GSTOP	19200	300	15	11.15	350	1986.55	2.8	0.35	0.35	1856
1104613	40	32	64	0.053413	0.420000	Intel-32t-2s	GSTOP_REFINEMENT	19200	300	15	11.15	350	1986.55	2.8	0.35	0.35	1856
1104613	40	32	64	0.051942	0.430000	Intel-32t-2s	GUPDATE_REFINEMENT	19200	300	15	11.15	350	1987.25	2.8	0.35	0.35	1856
1104613	40	32	64	0.054284	0.420000	Intel-32t-2s	GSTOP_REFINEMENT	19200	300	15	11.15	350	1986.55	2.8	0.35	0.35	1856
1104613	40	32	64	0.054933	0.420000	Intel-32t-2s	GUPDATE_REFINEMENT	19200	300	15	11.15	350	1987.25	2.8	0.35	0.35	1856
1104613	40	32	64	0.056038	0.430000	Intel-32t-2s	G	19200	300	15	11.15	350	1986.55	2.8	0.35	0.35	1856
1104613	40	32	64	0.054538	0.430000	Intel-32t-2s	GUPDATE	19200	300	15	11.15	350	1987.25	2.8	0.35	0.35	1856
1104613	40	32	64	0.050181	0.420000	Intel-32t-2s	GSTOP	19200	300	15	11.15	350	1986.55	2.8	0.35	0.35	1856
1104613	40	32	64	0.049965	0.410000	Intel-32t-2s	GSTOP_REFINEMENT	19200	300	15	11.15	350	1986.55	2.8	0.35	0.35	1856
1104613	40	32	64	0.053113	0.420000	Intel-32t-2s	GUPDATE_REFINEMENT	19200	300	15	11.15	350	1987.25	2.8	0.35	0.35	1856
1104613	40	32	64	0.054918	0.430000	Intel-32t-2s	G	19200	300	15	11.15	350	1986.55	2.8	0.35	0.35	1856
1104613	40	32	65	0.152461	0.500000	Intel-32t-2s	G	19200	296	7	3.02027	350	7624.4	2.8	0.35	0.35	7175
1104613	40	32	6	0.037225	0.560000	Intel-32t-2s	GUPDATE	19200	3200	42	30.2469	350	2334.05	2.8	0.35	0.35	768
1104613	40	32	65	0.139950	0.480000	Intel-32t-2s	GUPDATE	19200	296	6	3.18581	350	7075	2.8	0.35	0.35	6655
1104613	40	32	65	0.089442	0.450000	Intel-32t-2s	GSTOP	19200	452	10	6.00442	350	4237.85	2.8	0.35	0.35	3939
1104613	40	32	65	0.141701	0.490000	Intel-32t-2s	GUPDATE	19200	296	6	3.18581	350	7075	2.8	0.35	0.35	6655
1104613	40	32	65	0.097281	0.460000	Intel-32t-2s	GSTOP	19200	452	10	6.00442	350	4237.85	2.8	0.35	0.35	3939
1104613	40	32	65	0.092374	0.450000	Intel-32t-2s	GSTOP_REFINEMENT	19200	413	9	5.94915	350	4174.6	2.8	0.35	0.35	3939
1104613	40	32	65	0.145134	0.480000	Intel-32t-2s	GUPDATE_REFINEMENT	19200	228	6	2.97807	350	6946.55	2.8	0.35	0.35	6655
1104613	40	32	65	0.094559	0.450000	Intel-32t-2s	GSTOP_REFINEMENT	19200	413	9	5.94915	350	4174.6	2.8	0.35	0.35	3939
1104613	40	32	65	0.146064	0.490000	Intel-32t-2s	GUPDATE_REFINEMENT	19200	228	6	2.97807	350	6946.55	2.8	0.35	0.35	6655
1104613	40	32	65	0.156191	0.500000	Intel-32t-2s	G	19200	296	7	3.02027	350	7624.4	2.8	0.35	0.35	7175
1104613	40	32	65	0.138422	0.480000	Intel-32t-2s	GUPDATE	19200	296	6	3.18581	350	7075	2.8	0.35	0.35	6655
1104613	40	32	65	0.089138	0.440000	Intel-32t-2s	GSTOP	19200	452	10	6.00442	350	4237.85	2.8	0.35	0.35	3939
1104613	40	32	65	0.091138	0.450000	Intel-32t-2s	GSTOP_REFINEMENT	19200	413	9	5.94915	350	4174.6	2.8	0.35	0.35	3939
1104613	40	32	65	0.146142	0.490000	Intel-32t-2s	GUPDATE_REFINEMENT	19200	228	6	2.97807	350	6946.55	2.8	0.35	0.35	6655
1104613	40	32	65	0.155684	0.500000	Intel-32t-2s	G	19200	296	7	3.02027	350	7624.4	2.8	0.35	0.35	7175
1104613	40	32	66	0.161368	0.510000	Intel-32t-2s	G	19200	291	6	2.85567	350	7838.9	2.8	0.35	0.35	7386
1104613	40	32	6	0.034419	0.490000	Intel-32t-2s	GSTOP	19200	3229	42	30.821	350	2349.25	2.8	0.35	0.35	738
1104613	40	32	66	0.146827	0.490000	Intel-32t-2s	GUPDATE	19200	291	6	3.12027	350	7221.1	2.8	0.35	0.35	6792
1104613	40	32	66	0.074706	0.440000	Intel-32t-2s	GSTOP	19200	446	11	7.15919	350	3365.05	2.8	0.35	0.35	3122
1104613	40	32	66	0.146780	0.500000	Intel-32t-2s	GUPDATE	19200	291	6	3.12027	350	7221.1	2.8	0.35	0.35	6792
1104613	40	32	66	0.074331	0.440000	Intel-32t-2s	GSTOP	19200	446	11	7.15919	350	3365.05	2.8	0.35	0.35	3122
1104613	40	32	66	0.079203	0.440000	Intel-32t-2s	GSTOP_REFINEMENT	19200	420	10	6.77857	350	3345.75	2.8	0.35	0.35	3136
1104613	40	32	66	0.149171	0.490000	Intel-32t-2s	GUPDATE_REFINEMENT	19200	234	6	3.08974	350	7098.95	2.8	0.35	0.35	6792
1104613	40	32	66	0.075324	0.450000	Intel-32t-2s	GSTOP_REFINEMENT	19200	420	10	6.77857	350	3345.75	2.8	0.35	0.35	3136
1104613	40	32	66	0.150065	0.480000	Intel-32t-2s	GUPDATE_REFINEMENT	19200	234	6	3.08974	350	7098.95	2.8	0.35	0.35	6792
1104613	40	32	66	0.159194	0.490000	Intel-32t-2s	G	19200	291	6	2.85567	350	7838.9	2.8	0.35	0.35	7386
1104613	40	32	66	0.145593	0.490000	Intel-32t-2s	GUPDATE	19200	291	6	3.12027	350	7221.1	2.8	0.35	0.35	6792
1104613	40	32	66	0.074589	0.440000	Intel-32t-2s	GSTOP	19200	446	11	7.15919	350	3365.05	2.8	0.35	0.35	3122
1104613	40	32	66	0.076911	0.440000	Intel-32t-2s	GSTOP_REFINEMENT	19200	420	10	6.77857	350	3345.75	2.8	0.35	0.35	3136
1104613	40	32	66	0.149937	0.500000	Intel-32t-2s	GUPDATE_REFINEMENT	19200	234	6	3.08974	350	7098.95	2.8	0.35	0.35	6792
1104613	40	32	66	0.159859	0.500000	Intel-32t-2s	G	19200	291	6	2.85567	350	7838.9	2.8	0.35	0.35	7386
1104613	40	32	67	0.164440	0.500000	Intel-32t-2s	G	19200	287	5	2.71429	350	8353.35	2.8	0.35	0.35	7877
1104613	40	32	6	0.037991	0.470000	Intel-32t-2s	GSTOP_REFINEMENT	19200	2579	39	23.5227	350	1917	2.8	0.35	0.35	1059
1104613	40	32	67	0.142538	0.480000	Intel-32t-2s	GUPDATE	19200	287	7	3.14286	350	7008.25	2.8	0.35	0.35	6604
1104613	40	32	67	0.079388	0.430000	Intel-32t-2s	GSTOP	19200	434	12	7.24654	350	3468.55	2.8	0.35	0.35	3233
1104613	40	32	67	0.141556	0.480000	Intel-32t-2s	GUPDATE	19200	287	7	3.14286	350	7008.25	2.8	0.35	0.35	6604
1104613	40	32	67	0.076616	0.420000	Intel-32t-2s	GSTOP	19200	434	12	7.24654	350	3468.55	2.8	0.35	0.35	3233
1104613	40	32	67	0.077716	0.440000	Intel-32t-2s	GSTOP_REFINEMENT	19200	390	11	6.74103	350	3419.95	2.8	0.35	0.35	3234
1104613	40	32	67	0.147091	0.480000	Intel-32t-2s	GUPDATE_REFINEMENT	19200	226	6	3.07522	350	6889.25	2.8	0.35	0.35	6604
1104613	40	32	67	0.074930	0.430000	Intel-32t-2s	GSTOP_REFINEMENT	19200	390	11	6.74103	350	3419.95	2.8	0.35	0.35	3234
1104613	40	32	67	0.145096	0.490000	Intel-32t-2s	GUPDATE_REFINEMENT	19200	226	6	3.07522	350	6889.25	2.8	0.35	0.35	6604
1104613	40	32	67	0.163790	0.500000	Intel-32t-2s	G	19200	287	5	2.71429	350	8353.35	2.8	0.35	0.35	7877
1104613	40	32	67	0.141805	0.490000	Intel-32t-2s	GUPDATE	19200	287	7	3.14286	350	7008.25	2.8	0.35	0.35	6604
1104613	40	32	67	0.076390	0.440000	Intel-32t-2s	GSTOP	19200	434	12	7.24654	350	3468.55	2.8	0.35	0.35	3233
1104613	40	32	67	0.075322	0.430000	Intel-32t-2s	GSTOP_REFINEMENT	19200	390	11	6.74103	350	3419.95	2.8	0.35	0.35	3234
1104613	40	32	67	0.146513	0.500000	Intel-32t-2s	GUPDATE_REFINEMENT	19200	226	6	3.07522	350	6889.25	2.8	0.35	0.35	6604
1104613	40	32	67	0.164152	0.500000	Intel-32t-2s	G	19200	287	5	2.71429	350	8353.35	2.8	0.35	0.35	7877
1104613	40	32	68	0.147919	0.490000	Intel-32t-2s	G	19200	283	6	3.00707	350	7383.15	2.8	0.35	0.35	6960
1104613	40	32	6	0.037852	0.470000	Intel-32t-2s	GUPDATE_REFINEMENT	19200	2535	35	22.3049	350	1890.4	2.8	0.35	0.35	1056
1104613	40	32	68	0.148559	0.490000	Intel-32t-2s	GUPDATE	19200	283	6	3.18375	350	7316.9	2.8	0.35	0.35	6892
1104613	40	32	68	0.065862	0.440000	Intel-32t-2s	GSTOP	19200	358	10	7.09497	350	2822.1	2.8	0.35	0.35	2628
1104613	40	32	68	0.146607	0.490000	Intel-32t-2s	GUPDATE	19200	283	6	3.18375	350	7316.9	2.8	0.35	0.35	6892
1104613	40	32	68	0.065801	0.420000	Intel-32t-2s	GSTOP	19200	358	10	7.09497	350	2822.1	2.8	0.35	0.35	2628
1104613	40	32	68	0.067171	0.440000	Intel-32t-2s	GSTOP_REFINEMENT	19200	346	10	7.25723	350	2812.05	2.8	0.35	0.35	2640
1104613	40	32	68	0.150467	0.500000	Intel-32t-2s	GUPDATE_REFINEMENT	19200	220	7	2.98636	350	7186	2.8	0.35	0.35	6892
1104613	40	32	68	0.068656	0.430000	Intel-32t-2s	GSTOP_REFINEMENT	19200	346	10	7.25723	350	2812.05	2.8	0.35	0.35	2640
1104613	40	32	68	0.154836	0.510000	Intel-32t-2s	GUPDATE_REFINEMENT	19200	220	7	2.98636	350	7186	2.8	0.35	0.35	6892
1104613	40	32	68	0.148477	0.490000	Intel-32t-2s	G	19200	283	6	3.00707	350	7383.15	2.8	0.35	0.35	6960
1104613	40	32	68	0.147889	0.500000	Intel-32t-2s	GUPDATE	19200	283	6	3.18375	350	7316.9	2.8	0.35	0.35	6892
1104613	40	32	68	0.063618	0.430000	Intel-32t-2s	GSTOP	19200	358	10	7.09497	350	2822.1	2.8	0.35	0.35	2628
1104613	40	32	68	0.064423	0.420000	Intel-32t-2s	GSTOP_REFINEMENT	19200	346	10	7.25723	350	2812.05	2.8	0.35	0.35	2640
1104613	40	32	68	0.152490	0.490000	Intel-32t-2s	GUPDATE_REFINEMENT	19200	220	7	2.98636	350	7186	2.8	0.35	0.35	6892
1104613	40	32	68	0.148917	0.480000	Intel-32t-2s	G	19200	283	6	3.00707	350	7383.15	2.8	0.35	0.35	6960
1104613	40	32	69	0.155444	0.490000	Intel-32t-2s	G	19200	279	7	3.00358	350	7698.4	2.8	0.35	0.35	7263
1104613	40	32	6	0.036598	0.510000	Intel-32t-2s	G	19200	3200	40	28.2284	350	2455.05	2.8	0.35	0.35	852
1104613	40	32	69	0.142527	0.490000	Intel-32t-2s	GUPDATE	19200	279	6	3.26882	350	7021.25	2.8	0.35	0.35	6624
1104613	40	32	69	0.071209	0.430000	Intel-32t-2s	GSTOP	19200	370	11	7.14054	350	3046.1	2.8	0.35	0.35	2844
1104613	40	32	69	0.142493	0.480000	Intel-32t-2s	GUPDATE	19200	279	6	3.26882	350	7021.25	2.8	0.35	0.35	6624
1104613	40	32	69	0.066360	0.430000	Intel-32t-2s	GSTOP	19200	370	11	7.14054	350	3046.1	2.8	0.35	0.35	2844
1104613	40	32	69	0.070521	0.430000	Intel-32t-2s	GSTOP_REFINEMENT	19200	344	11	7.13953	350	3017.4	2.8	0.35	0.35	2844
1104613	40	32	69	0.144894	0.490000	Intel-32t-2s	GUPDATE_REFINEMENT	19200	222	6	3.05405	350	6913.1	2.8	0.35	0.35	6624
1104613	40	32	69	0.071123	0.430000	Intel-32t-2s	GSTOP_REFINEMENT	19200	344	11	7.13953	350	3017.4	2.8	0.35	0.35	2844
1104613	40	32	69	0.144344	0.490000	Intel-32t-2s	GUPDATE_REFINEMENT	19200	222	6	3.05405	350	6913.1	2.8	0.35	0.35	6624
1104613	40	32	69	0.154157	0.500000	Intel-32t-2s	G	19200	279	7	3.00358	350	7698.4	2.8	0.35	0.35	7263
1104613	40	32	69	0.140367	0.490000	Intel-32t-2s	GUPDATE	19200	279	6	3.26882	350	7021.25	2.8	0.35	0.35	6624
1104613	40	32	69	0.067627	0.410000	Intel-32t-2s	GSTOP	19200	370	11	7.14054	350	3046.1	2.8	0.35	0.35	2844
1104613	40	32	69	0.071374	0.430000	Intel-32t-2s	GSTOP_REFINEMENT	19200	344	11	7.13953	350	3017.4	2.8	0.35	0.35	2844
1104613	40	32	69	0.147165	0.490000	Intel-32t-2s	GUPDATE_REFINEMENT	19200	222	6	3.05405	350	6913.1	2.8	0.35	0.35	6624
1104613	40	32	69	0.154499	0.500000	Intel-32t-2s	G	19200	279	7	3.00358	350	7698.4	2.8	0.35	0.35	7263
1104613	40	32	7	0.057876	0.480000	Intel-32t-2s	G	19200	2743	19	10.7933	350	3208.85	2.8	0.35	0.35	2001
1104613	40	32	70	0.145735	0.480000	Intel-32t-2s	G	19200	275	7	3.08364	350	7210.4	2.8	0.35	0.35	6810
1104613	40	32	7	0.058921	0.470000	Intel-32t-2s	GUPDATE	19200	2743	20	11.1528	350	3157.4	2.8	0.35	0.35	1945
1104613	40	32	70	0.139781	0.480000	Intel-32t-2s	GUPDATE	19200	275	7	3.18909	350	6842.2	2.8	0.35	0.35	6460
1104613	40	32	70	0.070405	0.420000	Intel-32t-2s	GSTOP	19200	362	13	7.64641	350	3199.4	2.8	0.35	0.35	3002
1104613	40	32	70	0.139003	0.490000	Intel-32t-2s	GUPDATE	19200	275	7	3.18909	350	6842.2	2.8	0.35	0.35	6460
1104613	40	32	70	0.070038	0.430000	Intel-32t-2s	GSTOP	19200	362	13	7.64641	350	3199.4	2.8	0.35	0.35	3002
1104613	40	32	70	0.071363	0.430000	Intel-32t-2s	GSTOP_REFINEMENT	19200	335	12	7.63284	350	3167	2.8	0.35	0.35	3012
1104613	40	32	70	0.142214	0.490000	Intel-32t-2s	GUPDATE_REFINEMENT	19200	216	6	3.0463	350	6730.55	2.8	0.35	0.35	6460
1104613	40	32	70	0.071390	0.430000	Intel-32t-2s	GSTOP_REFINEMENT	19200	335	12	7.63284	350	3167	2.8	0.35	0.35	3012
1104613	40	32	70	0.140634	0.500000	Intel-32t-2s	GUPDATE_REFINEMENT	19200	216	6	3.0463	350	6730.55	2.8	0.35	0.35	6460
1104613	40	32	70	0.146722	0.490000	Intel-32t-2s	G	19200	275	7	3.08364	350	7210.4	2.8	0.35	0.35	6810
1104613	40	32	70	0.138393	0.480000	Intel-32t-2s	GUPDATE	19200	275	7	3.18909	350	6842.2	2.8	0.35	0.35	6460
1104613	40	32	70	0.072311	0.430000	Intel-32t-2s	GSTOP	19200	362	13	7.64641	350	3199.4	2.8	0.35	0.35	3002
1104613	40	32	70	0.070022	0.430000	Intel-32t-2s	GSTOP_REFINEMENT	19200	335	12	7.63284	350	3167	2.8	0.35	0.35	3012
1104613	40	32	70	0.142178	0.490000	Intel-32t-2s	GUPDATE_REFINEMENT	19200	216	6	3.0463	350	6730.55	2.8	0.35	0.35	6460
1104613	40	32	70	0.146617	0.490000	Intel-32t-2s	G	19200	275	7	3.08364	350	7210.4	2.8	0.35	0.35	6810
1104613	40	32	71	0.149945	0.490000	Intel-32t-2s	G	19200	271	7	3.12915	350	7382.45	2.8	0.35	0.35	6988
1104613	40	32	7	0.044539	0.460000	Intel-32t-2s	GSTOP	19200	3252	23	16.2359	350	2617.15	2.8	0.35	0.35	1380
1104613	40	32	7	0.058623	0.480000	Intel-32t-2s	GUPDATE	19200	2743	20	11.1528	350	3157.4	2.8	0.35	0.35	1945
1104613	40	32	71	0.129019	0.470000	Intel-32t-2s	GUPDATE	19200	271	7	3.48708	350	6199.2	2.8	0.35	0.35	5852
1104613	40	32	7	0.045980	0.490000	Intel-32t-2s	GSTOP	19200	3252	23	16.2359	350	2617.15	2.8	0.35	0.35	1380
1104613	40	32	71	0.067449	0.420000	Intel-32t-2s	GSTOP	19200	411	12	8.3747	350	2908.35	2.8	0.35	0.35	2729
1104613	40	32	71	0.127416	0.480000	Intel-32t-2s	GUPDATE	19200	271	7	3.48708	350	6199.2	2.8	0.35	0.35	5852
1104613	40	32	71	0.063074	0.420000	Intel-32t-2s	GSTOP	19200	411	12	8.3747	350	2908.35	2.8	0.35	0.35	2729
1104613	40	32	71	0.069045	0.430000	Intel-32t-2s	GSTOP_REFINEMENT	19200	379	11	8.22691	350	2876.35	2.8	0.35	0.35	2729
1104613	40	32	71	0.132649	0.470000	Intel-32t-2s	GUPDATE_REFINEMENT	19200	226	7	3.39823	350	6123.25	2.8	0.35	0.35	5852
1104613	40	32	7	0.059699	0.480000	Intel-32t-2s	GSTOP_REFINEMENT	19200	2930	22	14.7973	350	2394.25	2.8	0.35	0.35	1454
1104613	40	32	71	0.073313	0.440000	Intel-32t-2s	GSTOP_REFINEMENT	19200	379	11	8.22691	350	2876.35	2.8	0.35	0.35	2729
1104613	40	32	7	0.058527	0.460000	Intel-32t-2s	GUPDATE_REFINEMENT	19200	2431	18	10.9103	350	2938.3	2.8	0.35	0.35	2001
1104613	40	32	71	0.131544	0.480000	Intel-32t-2s	GUPDATE_REFINEMENT	19200	226	7	3.39823	350	6123.25	2.8	0.35	0.35	5852
1104613	40	32	71	0.151018	0.500000	Intel-32t-2s	G	19200	271	7	3.12915	350	7382.45	2.8	0.35	0.35	6988
1104613	40	32	71	0.127771	0.470000	Intel-32t-2s	GUPDATE	19200	271	7	3.48708	350	6199.2	2.8	0.35	0.35	5852
1104613	40	32	71	0.063299	0.420000	Intel-32t-2s	GSTOP	19200	411	12	8.3747	350	2908.35	2.8	0.35	0.35	2729
1104613	40	32	71	0.071171	0.440000	Intel-32t-2s	GSTOP_REFINEMENT	19200	379	11	8.22691	350	2876.35	2.8	0.35	0.35	2729
1104613	40	32	71	0.131316	0.480000	Intel-32t-2s	GUPDATE_REFINEMENT	19200	226	7	3.39823	350	6123.25	2.8	0.35	0.35	5852
1104613	40	32	71	0.148500	0.490000	Intel-32t-2s	G	19200	271	7	3.12915	350	7382.45	2.8	0.35	0.35	6988
1104613	40	32	72	0.124870	0.470000	Intel-32t-2s	G	19200	267	8	3.88764	350	6291.5	2.8	0.35	0.35	5952
1104613	40	32	7	0.046222	0.470000	Intel-32t-2s	GSTOP_REFINEMENT	19200	2930	22	14.7973	350	2394.25	2.8	0.35	0.35	1454
1104613	40	32	72	0.103294	0.450000	Intel-32t-2s	GUPDATE	19200	267	11	5.46442	350	5001	2.8	0.35	0.35	4728
1104613	40	32	72	0.064283	0.430000	Intel-32t-2s	GSTOP	19200	290	12	8.38966	350	2605.15	2.8	0.35	0.35	2456
1104613	40	32	72	0.102153	0.450000	Intel-32t-2s	GUPDATE	19200	267	11	5.46442	350	5001	2.8	0.35	0.35	4728
1104613	40	32	72	0.061732	0.430000	Intel-32t-2s	GSTOP	19200	290	12	8.38966	350	2605.15	2.8	0.35	0.35	2456
1104613	40	32	72	0.063316	0.430000	Intel-32t-2s	GSTOP_REFINEMENT	19200	273	12	8.75092	350	2580.2	2.8	0.35	0.35	2464
1104613	40	32	72	0.107496	0.460000	Intel-32t-2s	GUPDATE_REFINEMENT	19200	228	11	5.35088	350	4926.8	2.8	0.35	0.35	4728
1104613	40	32	72	0.062106	0.440000	Intel-32t-2s	GSTOP_REFINEMENT	19200	273	12	8.75092	350	2580.2	2.8	0.35	0.35	2464
1104613	40	32	72	0.106417	0.460000	Intel-32t-2s	GUPDATE_REFINEMENT	19200	228	11	5.35088	350	4926.8	2.8	0.35	0.35	4728
1104613	40	32	72	0.124790	0.470000	Intel-32t-2s	G	19200	267	8	3.88764	350	6291.5	2.8	0.35	0.35	5952
1104613	40	32	72	0.109166	0.460000	Intel-32t-2s	GUPDATE	19200	267	11	5.46442	350	5001	2.8	0.35	0.35	4728
1104613	40	32	72	0.064534	0.430000	Intel-32t-2s	GSTOP	19200	290	12	8.38966	350	2605.15	2.8	0.35	0.35	2456
1104613	40	32	72	0.059750	0.430000	Intel-32t-2s	GSTOP_REFINEMENT	19200	273	12	8.75092	350	2580.2	2.8	0.35	0.35	2464
1104613	40	32	72	0.108964	0.470000	Intel-32t-2s	GUPDATE_REFINEMENT	19200	228	11	5.35088	350	4926.8	2.8	0.35	0.35	4728
1104613	40	32	72	0.125703	0.470000	Intel-32t-2s	G	19200	267	8	3.88764	350	6291.5	2.8	0.35	0.35	5952
1104613	40	32	73	0.147624	0.490000	Intel-32t-2s	G	19200	264	6	3.125	350	7247.65	2.8	0.35	0.35	6863
1104613	40	32	7	0.058884	0.470000	Intel-32t-2s	GUPDATE_REFINEMENT	19200	2431	18	10.9103	350	2938.3	2.8	0.35	0.35	2001
1104613	40	32	73	0.147788	0.490000	Intel-32t-2s	GUPDATE	19200	264	7	2.96212	350	7402.75	2.8	0.35	0.35	7009
1104613	40	32	73	0.100814	0.450000	Intel-32t-2s	GSTOP	19200	389	8	5.01285	350	4914.95	2.8	0.35	0.35	4600
1104613	40	32	73	0.149607	0.490000	Intel-32t-2s	GUPDATE	19200	264	7	2.96212	350	7402.75	2.8	0.35	0.35	7009
1104613	40	32	73	0.102553	0.450000	Intel-32t-2s	GSTOP	19200	389	8	5.01285	350	4914.95	2.8	0.35	0.35	4600
1104613	40	32	73	0.103394	0.450000	Intel-32t-2s	GSTOP_REFINEMENT	19200	324	7	4.86111	350	4786.3	2.8	0.35	0.35	4600
1104613	40	32	73	0.157581	0.500000	Intel-32t-2s	GUPDATE_REFINEMENT	19200	191	6	2.84293	350	7276.75	2.8	0.35	0.35	7009
1104613	40	32	73	0.106771	0.450000	Intel-32t-2s	GSTOP_REFINEMENT	19200	324	7	4.86111	350	4786.3	2.8	0.35	0.35	4600
1104613	40	32	73	0.155594	0.500000	Intel-32t-2s	GUPDATE_REFINEMENT	19200	191	6	2.84293	350	7276.75	2.8	0.35	0.35	7009
1104613	40	32	73	0.145453	0.490000	Intel-32t-2s	G	19200	264	6	3.125	350	7247.65	2.8	0.35	0.35	6863
1104613	40	32	73	0.149941	0.500000	Intel-32t-2s	GUPDATE	19200	264	7	2.96212	350	7402.75	2.8	0.35	0.35	7009
1104613	40	32	73	0.100171	0.440000	Intel-32t-2s	GSTOP	19200	389	8	5.01285	350	4914.95	2.8	0.35	0.35	4600
1104613	40	32	73	0.105627	0.460000	Intel-32t-2s	GSTOP_REFINEMENT	19200	324	7	4.86111	350	4786.3	2.8	0.35	0.35	4600
1104613	40	32	73	0.156563	0.510000	Intel-32t-2s	GUPDATE_REFINEMENT	19200	191	6	2.84293	350	7276.75	2.8	0.35	0.35	7009
1104613	40	32	73	0.146885	0.490000	Intel-32t-2s	G	19200	264	6	3.125	350	7247.65	2.8	0.35	0.35	6863
1104613	40	32	74	0.175901	0.510000	Intel-32t-2s	G	19200	260	5	2.63846	350	8612.9	2.8	0.35	0.35	8174
1104613	40	32	7	0.060339	0.500000	Intel-32t-2s	G	19200	2743	19	10.7933	350	3208.85	2.8	0.35	0.35	2001
1104613	40	32	74	0.163635	0.510000	Intel-32t-2s	GUPDATE	19200	260	5	2.7	350	8068.65	2.8	0.35	0.35	7656
1104613	40	32	74	0.081237	0.450000	Intel-32t-2s	GSTOP	19200	396	10	6.5101	350	3927.2	2.8	0.35	0.35	3696
1104613	40	32	74	0.164567	0.510000	Intel-32t-2s	GUPDATE	19200	260	5	2.7	350	8068.65	2.8	0.35	0.35	7656
1104613	40	32	74	0.082026	0.450000	Intel-32t-2s	GSTOP	19200	396	10	6.5101	350	3927.2	2.8	0.35	0.35	3696
1104613	40	32	74	0.090278	0.450000	Intel-32t-2s	GSTOP_REFINEMENT	19200	355	10	6.30986	350	3875.9	2.8	0.35	0.35	3696
1104613	40	32	74	0.167701	0.500000	Intel-32t-2s	GUPDATE_REFINEMENT	19200	207	6	2.85507	350	7951.75	2.8	0.35	0.35	7656
1104613	40	32	74	0.086648	0.440000	Intel-32t-2s	GSTOP_REFINEMENT	19200	355	10	6.30986	350	3875.9	2.8	0.35	0.35	3696
1104613	40	32	74	0.166096	0.510000	Intel-32t-2s	GUPDATE_REFINEMENT	19200	207	6	2.85507	350	7951.75	2.8	0.35	0.35	7656
1104613	40	32	74	0.174472	0.500000	Intel-32t-2s	G	19200	260	5	2.63846	350	8612.9	2.8	0.35	0.35	8174
1104613	40	32	74	0.164811	0.500000	Intel-32t-2s	GUPDATE	19200	260	5	2.7	350	8068.65	2.8	0.35	0.35	7656
1104613	40	32	74	0.087342	0.450000	Intel-32t-2s	GSTOP	19200	396	10	6.5101	350	3927.2	2.8	0.35	0.35	3696
1104613	40	32	74	0.086479	0.460000	Intel-32t-2s	GSTOP_REFINEMENT	19200	355	10	6.30986	350	3875.9	2.8	0.35	0.35	3696
1104613	40	32	74	0.166835	0.510000	Intel-32t-2s	GUPDATE_REFINEMENT	19200	207	6	2.85507	350	7951.75	2.8	0.35	0.35	7656
1104613	40	32	74	0.173516	0.500000	Intel-32t-2s	G	19200	260	5	2.63846	350	8612.9	2.8	0.35	0.35	8174
1104613	40	32	75	0.161463	0.500000	Intel-32t-2s	G	19200	256	6	2.82812	350	7976.45	2.8	0.35	0.35	7575
1104613	40	32	7	0.058067	0.480000	Intel-32t-2s	GUPDATE	19200	2743	20	11.1528	350	3157.4	2.8	0.35	0.35	1945
1104613	40	32	75	0.152005	0.500000	Intel-32t-2s	GUPDATE	19200	256	6	3.06641	350	7430.8	2.8	0.35	0.35	7050
1104613	40	32	75	0.078454	0.450000	Intel-32t-2s	GSTOP	19200	394	11	7.08629	350	3441.6	2.8	0.35	0.35	3225
1104613	40	32	75	0.152014	0.490000	Intel-32t-2s	GUPDATE	19200	256	6	3.06641	350	7430.8	2.8	0.35	0.35	7050
1104613	40	32	75	0.075802	0.430000	Intel-32t-2s	GSTOP	19200	394	11	7.08629	350	3441.6	2.8	0.35	0.35	3225
1104613	40	32	75	0.078264	0.440000	Intel-32t-2s	GSTOP_REFINEMENT	19200	358	11	6.86034	350	3402.25	2.8	0.35	0.35	3227
1104613	40	32	75	0.168356	0.520000	Intel-32t-2s	GUPDATE_REFINEMENT	19200	192	6	2.86458	350	7315.65	2.8	0.35	0.35	7050
1104613	40	32	75	0.075727	0.440000	Intel-32t-2s	GSTOP_REFINEMENT	19200	358	11	6.86034	350	3402.25	2.8	0.35	0.35	3227
1104613	40	32	75	0.157844	0.510000	Intel-32t-2s	GUPDATE_REFINEMENT	19200	192	6	2.86458	350	7315.65	2.8	0.35	0.35	7050
1104613	40	32	75	0.164249	0.510000	Intel-32t-2s	G	19200	256	6	2.82812	350	7976.45	2.8	0.35	0.35	7575
1104613	40	32	75	0.151552	0.500000	Intel-32t-2s	GUPDATE	19200	256	6	3.06641	350	7430.8	2.8	0.35	0.35	7050
1104613	40	32	75	0.078705	0.440000	Intel-32t-2s	GSTOP	19200	394	11	7.08629	350	3441.6	2.8	0.35	0.35	3225
1104613	40	32	75	0.076612	0.440000	Intel-32t-2s	GSTOP_REFINEMENT	19200	358	11	6.86034	350	3402.25	2.8	0.35	0.35	3227
1104613	40	32	75	0.156047	0.490000	Intel-32t-2s	GUPDATE_REFINEMENT	19200	192	6	2.86458	350	7315.65	2.8	0.35	0.35	7050
1104613	40	32	75	0.161402	0.490000	Intel-32t-2s	G	19200	256	6	2.82812	350	7976.45	2.8	0.35	0.35	7575
1104613	40	32	76	0.156448	0.500000	Intel-32t-2s	G	19200	253	6	3.04743	350	7574.9	2.8	0.35	0.35	7192
1104613	40	32	7	0.046472	0.470000	Intel-32t-2s	GSTOP	19200	3252	23	16.2359	350	2617.15	2.8	0.35	0.35	1380
1104613	40	32	76	0.154769	0.500000	Intel-32t-2s	GUPDATE	19200	253	6	3.0751	350	7734.6	2.8	0.35	0.35	7344
1104613	40	32	76	0.071598	0.430000	Intel-32t-2s	GSTOP	19200	381	11	7.29659	350	3187.3	2.8	0.35	0.35	2992
1104613	40	32	76	0.154104	0.500000	Intel-32t-2s	GUPDATE	19200	253	6	3.0751	350	7734.6	2.8	0.35	0.35	7344
1104613	40	32	76	0.073696	0.430000	Intel-32t-2s	GSTOP	19200	381	11	7.29659	350	3187.3	2.8	0.35	0.35	2992
1104613	40	32	76	0.069167	0.430000	Intel-32t-2s	GSTOP_REFINEMENT	19200	352	10	6.90625	350	3160.7	2.8	0.35	0.35	2996
1104613	40	32	76	0.160411	0.490000	Intel-32t-2s	GUPDATE_REFINEMENT	19200	195	6	3.01026	350	7609.65	2.8	0.35	0.35	7344
1104613	40	32	76	0.073159	0.440000	Intel-32t-2s	GSTOP_REFINEMENT	19200	352	10	6.90625	350	3160.7	2.8	0.35	0.35	2996
1104613	40	32	76	0.161729	0.500000	Intel-32t-2s	GUPDATE_REFINEMENT	19200	195	6	3.01026	350	7609.65	2.8	0.35	0.35	7344
1104613	40	32	76	0.154576	0.510000	Intel-32t-2s	G	19200	253	6	3.04743	350	7574.9	2.8	0.35	0.35	7192
1104613	40	32	76	0.156003	0.500000	Intel-32t-2s	GUPDATE	19200	253	6	3.0751	350	7734.6	2.8	0.35	0.35	7344
1104613	40	32	76	0.076097	0.430000	Intel-32t-2s	GSTOP	19200	381	11	7.29659	350	3187.3	2.8	0.35	0.35	2992
1104613	40	32	76	0.070148	0.440000	Intel-32t-2s	GSTOP_REFINEMENT	19200	352	10	6.90625	350	3160.7	2.8	0.35	0.35	2996
1104613	40	32	76	0.161599	0.490000	Intel-32t-2s	GUPDATE_REFINEMENT	19200	195	6	3.01026	350	7609.65	2.8	0.35	0.35	7344
1104613	40	32	76	0.154072	0.500000	Intel-32t-2s	G	19200	253	6	3.04743	350	7574.9	2.8	0.35	0.35	7192
1104613	40	32	77	0.162372	0.520000	Intel-32t-2s	G	19200	250	6	2.732	350	7893.95	2.8	0.35	0.35	7496
1104613	40	32	7	0.047464	0.470000	Intel-32t-2s	GSTOP_REFINEMENT	19200	2930	22	14.7973	350	2394.25	2.8	0.35	0.35	1454
1104613	40	32	77	0.143155	0.480000	Intel-32t-2s	GUPDATE	19200	250	7	3.112	350	6846.05	2.8	0.35	0.35	6495
1104613	40	32	77	0.077551	0.440000	Intel-32t-2s	GSTOP	19200	368	12	7.375	350	3431.6	2.8	0.35	0.35	3221
1104613	40	32	77	0.141960	0.490000	Intel-32t-2s	GUPDATE	19200	250	7	3.112	350	6846.05	2.8	0.35	0.35	6495
1104613	40	32	77	0.077778	0.430000	Intel-32t-2s	GSTOP	19200	368	12	7.375	350	3431.6	2.8	0.35	0.35	3221
1104613	40	32	77	0.076488	0.440000	Intel-32t-2s	GSTOP_REFINEMENT	19200	326	11	6.69325	350	3380.9	2.8	0.35	0.35	3227
1104613	40	32	77	0.145058	0.490000	Intel-32t-2s	GUPDATE_REFINEMENT	19200	204	6	3.08824	350	6767.3	2.8	0.35	0.35	6495
1104613	40	32	77	0.075715	0.430000	Intel-32t-2s	GSTOP_REFINEMENT	19200	326	11	6.69325	350	3380.9	2.8	0.35	0.35	3227
1104613	40	32	77	0.147022	0.500000	Intel-32t-2s	GUPDATE_REFINEMENT	19200	204	6	3.08824	350	6767.3	2.8	0.35	0.35	6495
1104613	40	32	77	0.161620	0.500000	Intel-32t-2s	G	19200	250	6	2.732	350	7893.95	2.8	0.35	0.35	7496
1104613	40	32	77	0.141527	0.490000	Intel-32t-2s	GUPDATE	19200	250	7	3.112	350	6846.05	2.8	0.35	0.35	6495
1104613	40	32	77	0.075560	0.440000	Intel-32t-2s	GSTOP	19200	368	12	7.375	350	3431.6	2.8	0.35	0.35	3221
1104613	40	32	77	0.079390	0.430000	Intel-32t-2s	GSTOP_REFINEMENT	19200	326	11	6.69325	350	3380.9	2.8	0.35	0.35	3227
1104613	40	32	77	0.145982	0.490000	Intel-32t-2s	GUPDATE_REFINEMENT	19200	204	6	3.08824	350	6767.3	2.8	0.35	0.35	6495
1104613	40	32	77	0.160961	0.510000	Intel-32t-2s	G	19200	250	6	2.732	350	7893.95	2.8	0.35	0.35	7496
1104613	40	32	78	0.168906	0.520000	Intel-32t-2s	G	19200	247	6	2.77733	350	8221.85	2.8	0.35	0.35	7812
1104613	40	32	7	0.059038	0.480000	Intel-32t-2s	GUPDATE_REFINEMENT	19200	2431	18	10.9103	350	2938.3	2.8	0.35	0.35	2001
1104613	40	32	78	0.140715	0.480000	Intel-32t-2s	GUPDATE	19200	247	6	3.21862	350	6836.7	2.8	0.35	0.35	6486
1104613	40	32	78	0.073184	0.440000	Intel-32t-2s	GSTOP	19200	289	12	7.11765	350	3189.15	2.8	0.35	0.35	3012
1104613	40	32	78	0.142250	0.500000	Intel-32t-2s	GUPDATE	19200	247	6	3.21862	350	6836.7	2.8	0.35	0.35	6486
1104613	40	32	78	0.071046	0.420000	Intel-32t-2s	GSTOP	19200	289	12	7.11765	350	3189.15	2.8	0.35	0.35	3012
1104613	40	32	78	0.074021	0.430000	Intel-32t-2s	GSTOP_REFINEMENT	19200	281	11	7.04626	350	3173.35	2.8	0.35	0.35	3012
1104613	40	32	78	0.147623	0.480000	Intel-32t-2s	GUPDATE_REFINEMENT	19200	200	7	3.285	350	6734.5	2.8	0.35	0.35	6486
1104613	40	32	78	0.072736	0.430000	Intel-32t-2s	GSTOP_REFINEMENT	19200	281	11	7.04626	350	3173.35	2.8	0.35	0.35	3012
1104613	40	32	78	0.143095	0.490000	Intel-32t-2s	GUPDATE_REFINEMENT	19200	200	7	3.285	350	6734.5	2.8	0.35	0.35	6486
1104613	40	32	78	0.168198	0.500000	Intel-32t-2s	G	19200	247	6	2.77733	350	8221.85	2.8	0.35	0.35	7812
1104613	40	32	78	0.139956	0.490000	Intel-32t-2s	GUPDATE	19200	247	6	3.21862	350	6836.7	2.8	0.35	0.35	6486
1104613	40	32	78	0.077256	0.440000	Intel-32t-2s	GSTOP	19200	289	12	7.11765	350	3189.15	2.8	0.35	0.35	3012
1104613	40	32	78	0.074433	0.440000	Intel-32t-2s	GSTOP_REFINEMENT	19200	281	11	7.04626	350	3173.35	2.8	0.35	0.35	3012
1104613	40	32	78	0.142108	0.480000	Intel-32t-2s	GUPDATE_REFINEMENT	19200	200	7	3.285	350	6734.5	2.8	0.35	0.35	6486
1104613	40	32	78	0.167499	0.510000	Intel-32t-2s	G	19200	247	6	2.77733	350	8221.85	2.8	0.35	0.35	7812
1104613	40	32	79	0.157215	0.500000	Intel-32t-2s	G	19200	244	6	2.93033	350	7569.3	2.8	0.35	0.35	7192
1104613	40	32	7	0.057705	0.470000	Intel-32t-2s	G	19200	2743	19	10.7933	350	3208.85	2.8	0.35	0.35	2001
1104613	40	32	79	0.144011	0.490000	Intel-32t-2s	GUPDATE	19200	244	6	3.20082	350	6913.15	2.8	0.35	0.35	6560
1104613	40	32	79	0.071084	0.430000	Intel-32t-2s	GSTOP	19200	344	14	7.70058	350	3203.55	2.8	0.35	0.35	3006
1104613	40	32	79	0.144837	0.500000	Intel-32t-2s	GUPDATE	19200	244	6	3.20082	350	6913.15	2.8	0.35	0.35	6560
1104613	40	32	79	0.072281	0.430000	Intel-32t-2s	GSTOP	19200	344	14	7.70058	350	3203.55	2.8	0.35	0.35	3006
1104613	40	32	79	0.075019	0.440000	Intel-32t-2s	GSTOP_REFINEMENT	19200	299	11	7.15385	350	3140.35	2.8	0.35	0.35	3011
1104613	40	32	79	0.146541	0.500000	Intel-32t-2s	GUPDATE_REFINEMENT	19200	194	6	3.05155	350	6804.3	2.8	0.35	0.35	6560
1104613	40	32	79	0.075144	0.440000	Intel-32t-2s	GSTOP_REFINEMENT	19200	299	11	7.15385	350	3140.35	2.8	0.35	0.35	3011
1104613	40	32	79	0.146657	0.490000	Intel-32t-2s	GUPDATE_REFINEMENT	19200	194	6	3.05155	350	6804.3	2.8	0.35	0.35	6560
1104613	40	32	79	0.158510	0.510000	Intel-32t-2s	G	19200	244	6	2.93033	350	7569.3	2.8	0.35	0.35	7192
1104613	40	32	79	0.144550	0.490000	Intel-32t-2s	GUPDATE	19200	244	6	3.20082	350	6913.15	2.8	0.35	0.35	6560
1104613	40	32	79	0.072295	0.430000	Intel-32t-2s	GSTOP	19200	344	14	7.70058	350	3203.55	2.8	0.35	0.35	3006
1104613	40	32	79	0.072174	0.440000	Intel-32t-2s	GSTOP_REFINEMENT	19200	299	11	7.15385	350	3140.35	2.8	0.35	0.35	3011
1104613	40	32	79	0.148262	0.490000	Intel-32t-2s	GUPDATE_REFINEMENT	19200	194	6	3.05155	350	6804.3	2.8	0.35	0.35	6560
1104613	40	32	79	0.154762	0.500000	Intel-32t-2s	G	19200	244	6	2.93033	350	7569.3	2.8	0.35	0.35	7192
1104613	40	32	8	0.052680	0.460000	Intel-32t-2s	G	19200	2400	20	12.6596	350	2806.05	2.8	0.35	0.35	1816
1104613	40	32	80	0.148169	0.490000	Intel-32t-2s	G	19200	240	8	3.525	350	7234.55	2.8	0.35	0.35	6880
1104613	40	32	8	0.063745	0.490000	Intel-32t-2s	GUPDATE	19200	2400	30	15.4021	350	2587.85	2.8	0.35	0.35	1576
1104613	40	32	80	0.117434	0.470000	Intel-32t-2s	GUPDATE	19200	240	12	5.22083	350	5468.1	2.8	0.35	0.35	5200
1104613	40	32	80	0.063129	0.410000	Intel-32t-2s	GSTOP	19200	270	11	7.37778	350	2439.25	2.8	0.35	0.35	2280
1104613	40	32	80	0.116315	0.460000	Intel-32t-2s	GUPDATE	19200	240	12	5.22083	350	5468.1	2.8	0.35	0.35	5200
1104613	40	32	80	0.059774	0.420000	Intel-32t-2s	GSTOP	19200	270	11	7.37778	350	2439.25	2.8	0.35	0.35	2280
1104613	40	32	80	0.061499	0.430000	Intel-32t-2s	GSTOP_REFINEMENT	19200	259	13	9.08108	350	2413.65	2.8	0.35	0.35	2288
1104613	40	32	80	0.116380	0.470000	Intel-32t-2s	GUPDATE_REFINEMENT	19200	208	10	5.04327	350	5406.15	2.8	0.35	0.35	5200
1104613	40	32	80	0.064549	0.420000	Intel-32t-2s	GSTOP_REFINEMENT	19200	259	13	9.08108	350	2413.65	2.8	0.35	0.35	2288
1104613	40	32	80	0.119646	0.470000	Intel-32t-2s	GUPDATE_REFINEMENT	19200	208	10	5.04327	350	5406.15	2.8	0.35	0.35	5200
1104613	40	32	80	0.147339	0.490000	Intel-32t-2s	G	19200	240	8	3.525	350	7234.55	2.8	0.35	0.35	6880
1104613	40	32	80	0.115453	0.460000	Intel-32t-2s	GUPDATE	19200	240	12	5.22083	350	5468.1	2.8	0.35	0.35	5200
1104613	40	32	80	0.066800	0.440000	Intel-32t-2s	GSTOP	19200	270	11	7.37778	350	2439.25	2.8	0.35	0.35	2280
1104613	40	32	80	0.060312	0.430000	Intel-32t-2s	GSTOP_REFINEMENT	19200	259	13	9.08108	350	2413.65	2.8	0.35	0.35	2288
1104613	40	32	80	0.118185	0.470000	Intel-32t-2s	GUPDATE_REFINEMENT	19200	208	10	5.04327	350	5406.15	2.8	0.35	0.35	5200
1104613	40	32	80	0.145739	0.490000	Intel-32t-2s	G	19200	240	8	3.525	350	7234.55	2.8	0.35	0.35	6880
1104613	40	32	81	0.120859	0.480000	Intel-32t-2s	G	19200	238	10	4.26891	350	5796.25	2.8	0.35	0.35	5511
1104613	40	32	8	0.040368	0.460000	Intel-32t-2s	GSTOP	19200	2686	23	17.5596	350	2049.75	2.8	0.35	0.35	1096
1104613	40	32	8	0.055006	0.540000	Intel-32t-2s	GUPDATE	19200	2400	30	15.4021	350	2587.85	2.8	0.35	0.35	1576
1104613	40	32	81	0.121962	0.480000	Intel-32t-2s	GUPDATE	19200	238	10	4.35294	350	5708.6	2.8	0.35	0.35	5430
1104613	40	32	8	0.040066	0.450000	Intel-32t-2s	GSTOP	19200	2686	23	17.5596	350	2049.75	2.8	0.35	0.35	1096
1104613	40	32	81	0.070976	0.440000	Intel-32t-2s	GSTOP	19200	268	11	8.29104	350	2628.55	2.8	0.35	0.35	2493
1104613	40	32	81	0.123178	0.480000	Intel-32t-2s	GUPDATE	19200	238	10	4.35294	350	5708.6	2.8	0.35	0.35	5430
1104613	40	32	81	0.060645	0.430000	Intel-32t-2s	GSTOP	19200	268	11	8.29104	350	2628.55	2.8	0.35	0.35	2493
1104613	40	32	81	0.070189	0.440000	Intel-32t-2s	GSTOP_REFINEMENT	19200	256	12	8.47266	350	2605.4	2.8	0.35	0.35	2493
1104613	40	32	81	0.122819	0.460000	Intel-32t-2s	GUPDATE_REFINEMENT	19200	201	10	4.59701	350	5635.1	2.8	0.35	0.35	5430
1104613	40	32	8	0.044064	0.460000	Intel-32t-2s	GSTOP_REFINEMENT	19200	2461	21	15.9488	350	1939.45	2.8	0.35	0.35	1298
1104613	40	32	81	0.062976	0.430000	Intel-32t-2s	GSTOP_REFINEMENT	19200	256	12	8.47266	350	2605.4	2.8	0.35	0.35	2493
1104613	40	32	8	0.053398	0.450000	Intel-32t-2s	GUPDATE_REFINEMENT	19200	2149	24	13.8688	350	2423.3	2.8	0.35	0.35	1704
1104613	40	32	81	0.124977	0.480000	Intel-32t-2s	GUPDATE_REFINEMENT	19200	201	10	4.59701	350	5635.1	2.8	0.35	0.35	5430
1104613	40	32	81	0.122380	0.470000	Intel-32t-2s	G	19200	238	10	4.26891	350	5796.25	2.8	0.35	0.35	5511
1104613	40	32	81	0.119579	0.460000	Intel-32t-2s	GUPDATE	19200	238	10	4.35294	350	5708.6	2.8	0.35	0.35	5430
1104613	40	32	81	0.062321	0.430000	Intel-32t-2s	GSTOP	19200	268	11	8.29104	350	2628.55	2.8	0.35	0.35	2493
1104613	40	32	81	0.062550	0.430000	Intel-32t-2s	GSTOP_REFINEMENT	19200	256	12	8.47266	350	2605.4	2.8	0.35	0.35	2493
1104613	40	32	81	0.123782	0.480000	Intel-32t-2s	GUPDATE_REFINEMENT	19200	201	10	4.59701	350	5635.1	2.8	0.35	0.35	5430
1104613	40	32	81	0.122290	0.460000	Intel-32t-2s	G	19200	238	10	4.26891	350	5796.25	2.8	0.35	0.35	5511
1104613	40	32	82	0.147476	0.490000	Intel-32t-2s	G	19200	235	7	3.04255	350	7157.85	2.8	0.35	0.35	6818
1104613	40	32	8	0.044998	0.450000	Intel-32t-2s	GSTOP_REFINEMENT	19200	2461	21	15.9488	350	1939.45	2.8	0.35	0.35	1298
1104613	40	32	82	0.155640	0.510000	Intel-32t-2s	GUPDATE	19200	235	6	3.04681	350	7580.8	2.8	0.35	0.35	7228
1104613	40	32	82	0.095983	0.450000	Intel-32t-2s	GSTOP	19200	362	8	5.58287	350	4391.4	2.8	0.35	0.35	4138
1104613	40	32	82	0.156143	0.500000	Intel-32t-2s	GUPDATE	19200	235	6	3.04681	350	7580.8	2.8	0.35	0.35	7228
1104613	40	32	82	0.092686	0.440000	Intel-32t-2s	GSTOP	19200	362	8	5.58287	350	4391.4	2.8	0.35	0.35	4138
1104613	40	32	82	0.099918	0.460000	Intel-32t-2s	GSTOP_REFINEMENT	19200	334	8	5.31138	350	4354.2	2.8	0.35	0.35	4139
1104613	40	32	82	0.159156	0.500000	Intel-32t-2s	GUPDATE_REFINEMENT	19200	184	6	2.94022	350	7477.55	2.8	0.35	0.35	7228
1104613	40	32	82	0.094379	0.440000	Intel-32t-2s	GSTOP_REFINEMENT	19200	334	8	5.31138	350	4354.2	2.8	0.35	0.35	4139
1104613	40	32	82	0.161788	0.500000	Intel-32t-2s	GUPDATE_REFINEMENT	19200	184	6	2.94022	350	7477.55	2.8	0.35	0.35	7228
1104613	40	32	82	0.148072	0.490000	Intel-32t-2s	G	19200	235	7	3.04255	350	7157.85	2.8	0.35	0.35	6818
1104613	40	32	82	0.156886	0.500000	Intel-32t-2s	GUPDATE	19200	235	6	3.04681	350	7580.8	2.8	0.35	0.35	7228
1104613	40	32	82	0.093107	0.450000	Intel-32t-2s	GSTOP	19200	362	8	5.58287	350	4391.4	2.8	0.35	0.35	4138
1104613	40	32	82	0.099342	0.460000	Intel-32t-2s	GSTOP_REFINEMENT	19200	334	8	5.31138	350	4354.2	2.8	0.35	0.35	4139
1104613	40	32	82	0.158371	0.500000	Intel-32t-2s	GUPDATE_REFINEMENT	19200	184	6	2.94022	350	7477.55	2.8	0.35	0.35	7228
1104613	40	32	82	0.146307	0.500000	Intel-32t-2s	G	19200	235	7	3.04255	350	7157.85	2.8	0.35	0.35	6818
1104613	40	32	83	0.178113	0.520000	Intel-32t-2s	G	19200	232	6	2.54741	350	8820.2	2.8	0.35	0.35	8410
1104613	40	32	8	0.051358	0.460000	Intel-32t-2s	GUPDATE_REFINEMENT	19200	2149	24	13.8688	350	2423.3	2.8	0.35	0.35	1704
1104613	40	32	83	0.159814	0.500000	Intel-32t-2s	GUPDATE	19200	232	6	2.92672	350	7765.4	2.8	0.35	0.35	7414
1104613	40	32	83	0.091232	0.440000	Intel-32t-2s	GSTOP	19200	350	10	6.08	350	4208.8	2.8	0.35	0.35	3982
1104613	40	32	83	0.161632	0.500000	Intel-32t-2s	GUPDATE	19200	232	6	2.92672	350	7765.4	2.8	0.35	0.35	7414
1104613	40	32	83	0.093352	0.450000	Intel-32t-2s	GSTOP	19200	350	10	6.08	350	4208.8	2.8	0.35	0.35	3982
1104613	40	32	83	0.092454	0.450000	Intel-32t-2s	GSTOP_REFINEMENT	19200	306	9	5.42484	350	4163.3	2.8	0.35	0.35	3982
1104613	40	32	83	0.165702	0.500000	Intel-32t-2s	GUPDATE_REFINEMENT	19200	182	6	3.04945	350	7656.55	2.8	0.35	0.35	7414
1104613	40	32	83	0.093393	0.450000	Intel-32t-2s	GSTOP_REFINEMENT	19200	306	9	5.42484	350	4163.3	2.8	0.35	0.35	3982
1104613	40	32	83	0.164045	0.510000	Intel-32t-2s	GUPDATE_REFINEMENT	19200	182	6	3.04945	350	7656.55	2.8	0.35	0.35	7414
1104613	40	32	83	0.177886	0.520000	Intel-32t-2s	G	19200	232	6	2.54741	350	8820.2	2.8	0.35	0.35	8410
1104613	40	32	83	0.158277	0.500000	Intel-32t-2s	GUPDATE	19200	232	6	2.92672	350	7765.4	2.8	0.35	0.35	7414
1104613	40	32	83	0.097126	0.460000	Intel-32t-2s	GSTOP	19200	350	10	6.08	350	4208.8	2.8	0.35	0.35	3982
1104613	40	32	83	0.098195	0.440000	Intel-32t-2s	GSTOP_REFINEMENT	19200	306	9	5.42484	350	4163.3	2.8	0.35	0.35	3982
1104613	40	32	83	0.164374	0.510000	Intel-32t-2s	GUPDATE_REFINEMENT	19200	182	6	3.04945	350	7656.55	2.8	0.35	0.35	7414
1104613	40	32	83	0.177177	0.510000	Intel-32t-2s	G	19200	232	6	2.54741	350	8820.2	2.8	0.35	0.35	8410
1104613	40	32	84	0.165782	0.510000	Intel-32t-2s	G	19200	229	6	2.77293	350	7976.2	2.8	0.35	0.35	7608
1104613	40	32	8	0.053253	0.460000	Intel-32t-2s	G	19200	2400	20	12.6596	350	2806.05	2.8	0.35	0.35	1816
1104613	40	32	84	0.155788	0.500000	Intel-32t-2s	GUPDATE	19200	229	5	2.76419	350	7709.15	2.8	0.35	0.35	7356
1104613	40	32	84	0.081012	0.440000	Intel-32t-2s	GSTOP	19200	344	10	6.63663	350	3622.45	2.8	0.35	0.35	3427
1104613	40	32	84	0.157710	0.510000	Intel-32t-2s	GUPDATE	19200	229	5	2.76419	350	7709.15	2.8	0.35	0.35	7356
1104613	40	32	84	0.083850	0.440000	Intel-32t-2s	GSTOP	19200	344	10	6.63663	350	3622.45	2.8	0.35	0.35	3427
1104613	40	32	84	0.079554	0.430000	Intel-32t-2s	GSTOP_REFINEMENT	19200	314	11	6.23567	350	3587.9	2.8	0.35	0.35	3427
1104613	40	32	84	0.159640	0.510000	Intel-32t-2s	GUPDATE_REFINEMENT	19200	182	5	2.68132	350	7608.7	2.8	0.35	0.35	7356
1104613	40	32	84	0.084779	0.450000	Intel-32t-2s	GSTOP_REFINEMENT	19200	314	11	6.23567	350	3587.9	2.8	0.35	0.35	3427
1104613	40	32	84	0.163581	0.500000	Intel-32t-2s	GUPDATE_REFINEMENT	19200	182	5	2.68132	350	7608.7	2.8	0.35	0.35	7356
1104613	40	32	84	0.165692	0.500000	Intel-32t-2s	G	19200	229	6	2.77293	350	7976.2	2.8	0.35	0.35	7608
1104613	40	32	84	0.154983	0.490000	Intel-32t-2s	GUPDATE	19200	229	5	2.76419	350	7709.15	2.8	0.35	0.35	7356
1104613	40	32	84	0.081944	0.440000	Intel-32t-2s	GSTOP	19200	344	10	6.63663	350	3622.45	2.8	0.35	0.35	3427
1104613	40	32	84	0.079786	0.430000	Intel-32t-2s	GSTOP_REFINEMENT	19200	314	11	6.23567	350	3587.9	2.8	0.35	0.35	3427
1104613	40	32	84	0.163219	0.520000	Intel-32t-2s	GUPDATE_REFINEMENT	19200	182	5	2.68132	350	7608.7	2.8	0.35	0.35	7356
1104613	40	32	84	0.165569	0.500000	Intel-32t-2s	G	19200	229	6	2.77293	350	7976.2	2.8	0.35	0.35	7608
1104613	40	32	85	0.165618	0.500000	Intel-32t-2s	G	19200	226	6	2.78319	350	8091.8	2.8	0.35	0.35	7725
1104613	40	32	8	0.049619	0.450000	Intel-32t-2s	GUPDATE	19200	2400	30	15.4021	350	2587.85	2.8	0.35	0.35	1576
1104613	40	32	85	0.148797	0.490000	Intel-32t-2s	GUPDATE	19200	226	6	3.03982	350	7214.15	2.8	0.35	0.35	6875
1104613	40	32	85	0.083040	0.450000	Intel-32t-2s	GSTOP	19200	346	11	6.93064	350	3544.9	2.8	0.35	0.35	3341
1104613	40	32	85	0.149191	0.500000	Intel-32t-2s	GUPDATE	19200	226	6	3.03982	350	7214.15	2.8	0.35	0.35	6875
1104613	40	32	85	0.077031	0.430000	Intel-32t-2s	GSTOP	19200	346	11	6.93064	350	3544.9	2.8	0.35	0.35	3341
1104613	40	32	85	0.078931	0.440000	Intel-32t-2s	GSTOP_REFINEMENT	19200	314	9	6.38217	350	3503.65	2.8	0.35	0.35	3347
1104613	40	32	85	0.153445	0.500000	Intel-32t-2s	GUPDATE_REFINEMENT	19200	181	6	2.92265	350	7127	2.8	0.35	0.35	6875
1104613	40	32	85	0.078800	0.430000	Intel-32t-2s	GSTOP_REFINEMENT	19200	314	9	6.38217	350	3503.65	2.8	0.35	0.35	3347
1104613	40	32	85	0.153755	0.500000	Intel-32t-2s	GUPDATE_REFINEMENT	19200	181	6	2.92265	350	7127	2.8	0.35	0.35	6875
1104613	40	32	85	0.164552	0.500000	Intel-32t-2s	G	19200	226	6	2.78319	350	8091.8	2.8	0.35	0.35	7725
1104613	40	32	85	0.150336	0.500000	Intel-32t-2s	GUPDATE	19200	226	6	3.03982	350	7214.15	2.8	0.35	0.35	6875
1104613	40	32	85	0.077522	0.430000	Intel-32t-2s	GSTOP	19200	346	11	6.93064	350	3544.9	2.8	0.35	0.35	3341
1104613	40	32	85	0.081597	0.440000	Intel-32t-2s	GSTOP_REFINEMENT	19200	314	9	6.38217	350	3503.65	2.8	0.35	0.35	3347
1104613	40	32	85	0.152839	0.500000	Intel-32t-2s	GUPDATE_REFINEMENT	19200	181	6	2.92265	350	7127	2.8	0.35	0.35	6875
1104613	40	32	85	0.164439	0.510000	Intel-32t-2s	G	19200	226	6	2.78319	350	8091.8	2.8	0.35	0.35	7725
1104613	40	32	86	0.172283	0.520000	Intel-32t-2s	G	19200	224	5	2.51786	350	8310.25	2.8	0.35	0.35	7934
1104613	40	32	8	0.047660	0.580000	Intel-32t-2s	GSTOP	19200	2686	23	17.5596	350	2049.75	2.8	0.35	0.35	1096
1104613	40	32	86	0.163528	0.510000	Intel-32t-2s	GUPDATE	19200	224	5	2.80357	350	7865.2	2.8	0.35	0.35	7504
1104613	40	32	86	0.083782	0.450000	Intel-32t-2s	GSTOP	19200	303	9	6.21782	350	3787.15	2.8	0.35	0.35	3581
1104613	40	32	86	0.164521	0.500000	Intel-32t-2s	GUPDATE	19200	224	5	2.80357	350	7865.2	2.8	0.35	0.35	7504
1104613	40	32	86	0.081502	0.430000	Intel-32t-2s	GSTOP	19200	303	9	6.21782	350	3787.15	2.8	0.35	0.35	3581
1104613	40	32	86	0.084176	0.450000	Intel-32t-2s	GSTOP_REFINEMENT	19200	270	10	6.0963	350	3736.7	2.8	0.35	0.35	3581
1104613	40	32	86	0.165786	0.510000	Intel-32t-2s	GUPDATE_REFINEMENT	19200	181	5	2.80663	350	7776.3	2.8	0.35	0.35	7504
1104613	40	32	86	0.083344	0.440000	Intel-32t-2s	GSTOP_REFINEMENT	19200	270	10	6.0963	350	3736.7	2.8	0.35	0.35	3581
1104613	40	32	86	0.166516	0.520000	Intel-32t-2s	GUPDATE_REFINEMENT	19200	181	5	2.80663	350	7776.3	2.8	0.35	0.35	7504
1104613	40	32	86	0.171270	0.510000	Intel-32t-2s	G	19200	224	5	2.51786	350	8310.25	2.8	0.35	0.35	7934
1104613	40	32	86	0.162520	0.520000	Intel-32t-2s	GUPDATE	19200	224	5	2.80357	350	7865.2	2.8	0.35	0.35	7504
1104613	40	32	86	0.080944	0.430000	Intel-32t-2s	GSTOP	19200	303	9	6.21782	350	3787.15	2.8	0.35	0.35	3581
1104613	40	32	86	0.083838	0.440000	Intel-32t-2s	GSTOP_REFINEMENT	19200	270	10	6.0963	350	3736.7	2.8	0.35	0.35	3581
1104613	40	32	86	0.168444	0.520000	Intel-32t-2s	GUPDATE_REFINEMENT	19200	181	5	2.80663	350	7776.3	2.8	0.35	0.35	7504
1104613	40	32	86	0.169179	0.510000	Intel-32t-2s	G	19200	224	5	2.51786	350	8310.25	2.8	0.35	0.35	7934
1104613	40	32	87	0.171184	0.510000	Intel-32t-2s	G	19200	221	5	2.70136	350	8436.75	2.8	0.35	0.35	8064
1104613	40	32	8	0.048429	0.560000	Intel-32t-2s	GSTOP_REFINEMENT	19200	2461	21	15.9488	350	1939.45	2.8	0.35	0.35	1298
1104613	40	32	87	0.155793	0.510000	Intel-32t-2s	GUPDATE	19200	221	6	2.87783	350	7352.15	2.8	0.35	0.35	7020
1104613	40	32	87	0.078156	0.430000	Intel-32t-2s	GSTOP	19200	302	9	6.43709	350	3589.15	2.8	0.35	0.35	3393
1104613	40	32	87	0.153177	0.500000	Intel-32t-2s	GUPDATE	19200	221	6	2.87783	350	7352.15	2.8	0.35	0.35	7020
1104613	40	32	87	0.081484	0.440000	Intel-32t-2s	GSTOP	19200	302	9	6.43709	350	3589.15	2.8	0.35	0.35	3393
1104613	40	32	87	0.081385	0.450000	Intel-32t-2s	GSTOP_REFINEMENT	19200	271	10	6.32472	350	3546.8	2.8	0.35	0.35	3396
1104613	40	32	87	0.155893	0.500000	Intel-32t-2s	GUPDATE_REFINEMENT	19200	183	6	2.89071	350	7275.5	2.8	0.35	0.35	7020
1104613	40	32	87	0.078266	0.420000	Intel-32t-2s	GSTOP_REFINEMENT	19200	271	10	6.32472	350	3546.8	2.8	0.35	0.35	3396
1104613	40	32	87	0.153451	0.490000	Intel-32t-2s	GUPDATE_REFINEMENT	19200	183	6	2.89071	350	7275.5	2.8	0.35	0.35	7020
1104613	40	32	87	0.174594	0.510000	Intel-32t-2s	G	19200	221	5	2.70136	350	8436.75	2.8	0.35	0.35	8064
1104613	40	32	87	0.151524	0.490000	Intel-32t-2s	GUPDATE	19200	221	6	2.87783	350	7352.15	2.8	0.35	0.35	7020
1104613	40	32	87	0.077424	0.430000	Intel-32t-2s	GSTOP	19200	302	9	6.43709	350	3589.15	2.8	0.35	0.35	3393
1104613	40	32	87	0.082401	0.430000	Intel-32t-2s	GSTOP_REFINEMENT	19200	271	10	6.32472	350	3546.8	2.8	0.35	0.35	3396
1104613	40	32	87	0.155750	0.490000	Intel-32t-2s	GUPDATE_REFINEMENT	19200	183	6	2.89071	350	7275.5	2.8	0.35	0.35	7020
1104613	40	32	87	0.170964	0.510000	Intel-32t-2s	G	19200	221	5	2.70136	350	8436.75	2.8	0.35	0.35	8064
1104613	40	32	88	0.153143	0.500000	Intel-32t-2s	G	19200	219	7	2.96804	350	7568.7	2.8	0.35	0.35	7232
1104613	40	32	8	0.052523	0.460000	Intel-32t-2s	GUPDATE_REFINEMENT	19200	2149	24	13.8688	350	2423.3	2.8	0.35	0.35	1704
1104613	40	32	88	0.156637	0.510000	Intel-32t-2s	GUPDATE	19200	219	6	2.99087	350	7668.25	2.8	0.35	0.35	7320
1104613	40	32	88	0.072459	0.430000	Intel-32t-2s	GSTOP	19200	297	9	6.60269	350	3239.7	2.8	0.35	0.35	3069
1104613	40	32	88	0.072213	0.420000	Intel-32t-2s	GSTOP	19200	297	9	6.60269	350	3239.7	2.8	0.35	0.35	3069
1104613	40	32	88	0.075595	0.430000	Intel-32t-2s	GSTOP_REFINEMENT	19200	277	10	6.76895	350	3215.85	2.8	0.35	0.35	3079
1104613	40	32	88	0.164197	0.510000	Intel-32t-2s	GUPDATE_REFINEMENT	19200	171	6	2.81871	350	7562.55	2.8	0.35	0.35	7320
1104613	40	32	88	0.076956	0.430000	Intel-32t-2s	GSTOP_REFINEMENT	19200	277	10	6.76895	350	3215.85	2.8	0.35	0.35	3079
1104613	40	32	88	0.164061	0.500000	Intel-32t-2s	GUPDATE_REFINEMENT	19200	171	6	2.81871	350	7562.55	2.8	0.35	0.35	7320
1104613	40	32	88	0.153706	0.490000	Intel-32t-2s	G	19200	219	7	2.96804	350	7568.7	2.8	0.35	0.35	7232
1104613	40	32	88	0.155502	0.500000	Intel-32t-2s	GUPDATE	19200	219	6	2.99087	350	7668.25	2.8	0.35	0.35	7320
1104613	40	32	88	0.069103	0.420000	Intel-32t-2s	GSTOP	19200	297	9	6.60269	350	3239.7	2.8	0.35	0.35	3069
1104613	40	32	88	0.078248	0.450000	Intel-32t-2s	GSTOP_REFINEMENT	19200	277	10	6.76895	350	3215.85	2.8	0.35	0.35	3079
1104613	40	32	88	0.163445	0.510000	Intel-32t-2s	GUPDATE_REFINEMENT	19200	171	6	2.81871	350	7562.55	2.8	0.35	0.35	7320
1104613	40	32	88	0.155976	0.500000	Intel-32t-2s	G	19200	219	7	2.96804	350	7568.7	2.8	0.35	0.35	7232
1104613	40	32	89	0.157702	0.500000	Intel-32t-2s	G	19200	216	6	3.03241	350	7695.5	2.8	0.35	0.35	7363
1104613	40	32	8	0.052133	0.460000	Intel-32t-2s	G	19200	2400	20	12.6596	350	2806.05	2.8	0.35	0.35	1816
1104613	40	32	89	0.142184	0.490000	Intel-32t-2s	GUPDATE	19200	216	7	3.21759	350	6773.3	2.8	0.35	0.35	6473
1104613	40	32	89	0.070891	0.430000	Intel-32t-2s	GSTOP	19200	346	10	6.11272	350	3371.15	2.8	0.35	0.35	3145
1104613	40	32	89	0.141719	0.500000	Intel-32t-2s	GUPDATE	19200	216	7	3.21759	350	6773.3	2.8	0.35	0.35	6473
1104613	40	32	89	0.072486	0.430000	Intel-32t-2s	GSTOP	19200	346	10	6.11272	350	3371.15	2.8	0.35	0.35	3145
1104613	40	32	89	0.077589	0.440000	Intel-32t-2s	GSTOP_REFINEMENT	19200	297	9	6.18519	350	3309.8	2.8	0.35	0.35	3177
1104613	40	32	89	0.143358	0.480000	Intel-32t-2s	GUPDATE_REFINEMENT	19200	172	7	3.19767	350	6698.4	2.8	0.35	0.35	6473
1104613	40	32	89	0.077555	0.430000	Intel-32t-2s	GSTOP_REFINEMENT	19200	297	9	6.18519	350	3309.8	2.8	0.35	0.35	3177
1104613	40	32	89	0.146252	0.490000	Intel-32t-2s	GUPDATE_REFINEMENT	19200	172	7	3.19767	350	6698.4	2.8	0.35	0.35	6473
1104613	40	32	89	0.156842	0.500000	Intel-32t-2s	G	19200	216	6	3.03241	350	7695.5	2.8	0.35	0.35	7363
1104613	40	32	89	0.141858	0.480000	Intel-32t-2s	GUPDATE	19200	216	7	3.21759	350	6773.3	2.8	0.35	0.35	6473
1104613	40	32	89	0.070644	0.420000	Intel-32t-2s	GSTOP	19200	346	10	6.11272	350	3371.15	2.8	0.35	0.35	3145
1104613	40	32	89	0.079200	0.430000	Intel-32t-2s	GSTOP_REFINEMENT	19200	297	9	6.18519	350	3309.8	2.8	0.35	0.35	3177
1104613	40	32	89	0.143493	0.480000	Intel-32t-2s	GUPDATE_REFINEMENT	19200	172	7	3.19767	350	6698.4	2.8	0.35	0.35	6473
1104613	40	32	89	0.156585	0.500000	Intel-32t-2s	G	19200	216	6	3.03241	350	7695.5	2.8	0.35	0.35	7363
1104613	40	32	9	0.041527	0.560000	Intel-32t-2s	G	19200	2134	34	22.187	350	1799.4	2.8	0.35	0.35	1053
1104613	40	32	90	0.136336	0.490000	Intel-32t-2s	G	19200	214	11	4.71495	350	6527.35	2.8	0.35	0.35	6240
1104613	40	32	9	0.040727	0.480000	Intel-32t-2s	GUPDATE	19200	2134	32	20.0684	350	1875.55	2.8	0.35	0.35	1146
1104613	40	32	90	0.112106	0.460000	Intel-32t-2s	GUPDATE	19200	214	11	5.1028	350	5307.65	2.8	0.35	0.35	5070
1104613	40	32	90	0.058961	0.420000	Intel-32t-2s	GSTOP	19200	224	13	9.01786	350	2404.45	2.8	0.35	0.35	2290
1104613	40	32	90	0.111474	0.470000	Intel-32t-2s	GUPDATE	19200	214	11	5.1028	350	5307.65	2.8	0.35	0.35	5070
1104613	40	32	90	0.060549	0.430000	Intel-32t-2s	GSTOP	19200	224	13	9.01786	350	2404.45	2.8	0.35	0.35	2290
1104613	40	32	90	0.059065	0.420000	Intel-32t-2s	GSTOP_REFINEMENT	19200	222	13	8.9955	350	2400.25	2.8	0.35	0.35	2290
1104613	40	32	90	0.119419	0.470000	Intel-32t-2s	GUPDATE_REFINEMENT	19200	177	8	4.72881	350	5242.55	2.8	0.35	0.35	5070
1104613	40	32	90	0.058610	0.430000	Intel-32t-2s	GSTOP_REFINEMENT	19200	222	13	8.9955	350	2400.25	2.8	0.35	0.35	2290
1104613	40	32	90	0.115898	0.470000	Intel-32t-2s	GUPDATE_REFINEMENT	19200	177	8	4.72881	350	5242.55	2.8	0.35	0.35	5070
1104613	40	32	90	0.138521	0.490000	Intel-32t-2s	G	19200	214	11	4.71495	350	6527.35	2.8	0.35	0.35	6240
1104613	40	32	90	0.111990	0.460000	Intel-32t-2s	GUPDATE	19200	214	11	5.1028	350	5307.65	2.8	0.35	0.35	5070
1104613	40	32	90	0.062952	0.430000	Intel-32t-2s	GSTOP	19200	224	13	9.01786	350	2404.45	2.8	0.35	0.35	2290
1104613	40	32	90	0.065992	0.430000	Intel-32t-2s	GSTOP_REFINEMENT	19200	222	13	8.9955	350	2400.25	2.8	0.35	0.35	2290
1104613	40	32	90	0.117554	0.470000	Intel-32t-2s	GUPDATE_REFINEMENT	19200	177	8	4.72881	350	5242.55	2.8	0.35	0.35	5070
1104613	40	32	90	0.135713	0.480000	Intel-32t-2s	G	19200	214	11	4.71495	350	6527.35	2.8	0.35	0.35	6240
1104613	40	32	91	0.157865	0.500000	Intel-32t-2s	G	19200	211	6	2.88626	350	7884.5	2.8	0.35	0.35	7552
1104613	40	32	9	0.036281	0.450000	Intel-32t-2s	GSTOP	19200	2200	37	26.9709	350	1753	2.8	0.35	0.35	857
1104613	40	32	9	0.043467	0.580000	Intel-32t-2s	GUPDATE	19200	2134	32	20.0684	350	1875.55	2.8	0.35	0.35	1146
1104613	40	32	91	0.140182	0.480000	Intel-32t-2s	GUPDATE	19200	211	6	3.09479	350	6939.5	2.8	0.35	0.35	6642
1104613	40	32	9	0.034286	0.460000	Intel-32t-2s	GSTOP	19200	2200	37	26.9709	350	1753	2.8	0.35	0.35	857
1104613	40	32	91	0.107411	0.460000	Intel-32t-2s	GSTOP	19200	304	7	4.59539	350	4851.6	2.8	0.35	0.35	4597
1104613	40	32	91	0.140018	0.480000	Intel-32t-2s	GUPDATE	19200	211	6	3.09479	350	6939.5	2.8	0.35	0.35	6642
1104613	40	32	91	0.103629	0.450000	Intel-32t-2s	GSTOP	19200	304	7	4.59539	350	4851.6	2.8	0.35	0.35	4597
1104613	40	32	91	0.107309	0.460000	Intel-32t-2s	GSTOP_REFINEMENT	19200	254	7	4.65354	350	4768.35	2.8	0.35	0.35	4597
1104613	40	32	91	0.144404	0.490000	Intel-32t-2s	GUPDATE_REFINEMENT	19200	162	6	3.08025	350	6855.85	2.8	0.35	0.35	6642
1104613	40	32	9	0.043327	0.550000	Intel-32t-2s	GSTOP_REFINEMENT	19200	1928	32	22.0591	350	1536.55	2.8	0.35	0.35	1118
1104613	40	32	91	0.108709	0.450000	Intel-32t-2s	GSTOP_REFINEMENT	19200	254	7	4.65354	350	4768.35	2.8	0.35	0.35	4597
1104613	40	32	9	0.041161	0.440000	Intel-32t-2s	GUPDATE_REFINEMENT	19200	1888	29	18.7595	350	1728.1	2.8	0.35	0.35	1281
1104613	40	32	91	0.147254	0.490000	Intel-32t-2s	GUPDATE_REFINEMENT	19200	162	6	3.08025	350	6855.85	2.8	0.35	0.35	6642
1104613	40	32	91	0.160516	0.510000	Intel-32t-2s	G	19200	211	6	2.88626	350	7884.5	2.8	0.35	0.35	7552
1104613	40	32	91	0.140590	0.480000	Intel-32t-2s	GUPDATE	19200	211	6	3.09479	350	6939.5	2.8	0.35	0.35	6642
1104613	40	32	91	0.106798	0.460000	Intel-32t-2s	GSTOP	19200	304	7	4.59539	350	4851.6	2.8	0.35	0.35	4597
1104613	40	32	91	0.185942	0.450000	Intel-32t-2s	GSTOP_REFINEMENT	19200	254	7	4.65354	350	4768.35	2.8	0.35	0.35	4597
1104613	40	32	91	0.145411	0.480000	Intel-32t-2s	GUPDATE_REFINEMENT	19200	162	6	3.08025	350	6855.85	2.8	0.35	0.35	6642
1104613	40	32	91	0.158873	0.490000	Intel-32t-2s	G	19200	211	6	2.88626	350	7884.5	2.8	0.35	0.35	7552
1104613	40	32	92	0.173014	0.510000	Intel-32t-2s	G	19200	209	5	2.60287	350	8513.5	2.8	0.35	0.35	8160
1104613	40	32	9	0.035985	0.440000	Intel-32t-2s	GSTOP_REFINEMENT	19200	1928	32	22.0591	350	1536.55	2.8	0.35	0.35	1118
1104613	40	32	92	0.156687	0.500000	Intel-32t-2s	GUPDATE	19200	209	6	2.92344	350	7466.5	2.8	0.35	0.35	7148
1104613	40	32	92	0.096248	0.450000	Intel-32t-2s	GSTOP	19200	320	9	5.54375	350	4560.15	2.8	0.35	0.35	4331
1104613	40	32	92	0.155762	0.490000	Intel-32t-2s	GUPDATE	19200	209	6	2.92344	350	7466.5	2.8	0.35	0.35	7148
1104613	40	32	92	0.092438	0.450000	Intel-32t-2s	GSTOP	19200	320	9	5.54375	350	4560.15	2.8	0.35	0.35	4331
1104613	40	32	92	0.095889	0.460000	Intel-32t-2s	GSTOP_REFINEMENT	19200	291	9	5.15464	350	4501.35	2.8	0.35	0.35	4331
1104613	40	32	92	0.158417	0.490000	Intel-32t-2s	GUPDATE_REFINEMENT	19200	168	5	2.92262	350	7387.75	2.8	0.35	0.35	7148
1104613	40	32	92	0.095155	0.450000	Intel-32t-2s	GSTOP_REFINEMENT	19200	291	9	5.15464	350	4501.35	2.8	0.35	0.35	4331
1104613	40	32	92	0.161230	0.500000	Intel-32t-2s	GUPDATE_REFINEMENT	19200	168	5	2.92262	350	7387.75	2.8	0.35	0.35	7148
1104613	40	32	92	0.174248	0.510000	Intel-32t-2s	G	19200	209	5	2.60287	350	8513.5	2.8	0.35	0.35	8160
1104613	40	32	92	0.154579	0.480000	Intel-32t-2s	GUPDATE	19200	209	6	2.92344	350	7466.5	2.8	0.35	0.35	7148
1104613	40	32	92	0.092105	0.450000	Intel-32t-2s	GSTOP	19200	320	9	5.54375	350	4560.15	2.8	0.35	0.35	4331
1104613	40	32	92	0.096969	0.440000	Intel-32t-2s	GSTOP_REFINEMENT	19200	291	9	5.15464	350	4501.35	2.8	0.35	0.35	4331
1104613	40	32	92	0.159628	0.500000	Intel-32t-2s	GUPDATE_REFINEMENT	19200	168	5	2.92262	350	7387.75	2.8	0.35	0.35	7148
1104613	40	32	92	0.171807	0.500000	Intel-32t-2s	G	19200	209	5	2.60287	350	8513.5	2.8	0.35	0.35	8160
1104613	40	32	93	0.192532	0.530000	Intel-32t-2s	G	19200	207	5	2.30435	350	9354.65	2.8	0.35	0.35	8970
1104613	40	32	9	0.041315	0.450000	Intel-32t-2s	GUPDATE_REFINEMENT	19200	1888	29	18.7595	350	1728.1	2.8	0.35	0.35	1281
1104613	40	32	93	0.156451	0.510000	Intel-32t-2s	GUPDATE	19200	207	6	2.79227	350	7520.8	2.8	0.35	0.35	7203
1104613	40	32	93	0.085878	0.450000	Intel-32t-2s	GSTOP	19200	313	9	6.08626	350	4114.9	2.8	0.35	0.35	3914
1104613	40	32	93	0.154724	0.500000	Intel-32t-2s	GUPDATE	19200	207	6	2.79227	350	7520.8	2.8	0.35	0.35	7203
1104613	40	32	93	0.085722	0.440000	Intel-32t-2s	GSTOP	19200	313	9	6.08626	350	4114.9	2.8	0.35	0.35	3914
1104613	40	32	93	0.089023	0.440000	Intel-32t-2s	GSTOP_REFINEMENT	19200	281	9	5.74733	350	4058.35	2.8	0.35	0.35	3917
1104613	40	32	93	0.158558	0.500000	Intel-32t-2s	GUPDATE_REFINEMENT	19200	172	6	2.80814	350	7441	2.8	0.35	0.35	7203
1104613	40	32	93	0.089336	0.440000	Intel-32t-2s	GSTOP_REFINEMENT	19200	281	9	5.74733	350	4058.35	2.8	0.35	0.35	3917
1104613	40	32	93	0.162676	0.520000	Intel-32t-2s	GUPDATE_REFINEMENT	19200	172	6	2.80814	350	7441	2.8	0.35	0.35	7203
1104613	40	32	93	0.192063	0.530000	Intel-32t-2s	G	19200	207	5	2.30435	350	9354.65	2.8	0.35	0.35	8970
1104613	40	32	93	0.156409	0.500000	Intel-32t-2s	GUPDATE	19200	207	6	2.79227	350	7520.8	2.8	0.35	0.35	7203
1104613	40	32	93	0.086431	0.450000	Intel-32t-2s	GSTOP	19200	313	9	6.08626	350	4114.9	2.8	0.35	0.35	3914
1104613	40	32	93	0.089013	0.440000	Intel-32t-2s	GSTOP_REFINEMENT	19200	281	9	5.74733	350	4058.35	2.8	0.35	0.35	3917
1104613	40	32	93	0.160899	0.510000	Intel-32t-2s	GUPDATE_REFINEMENT	19200	172	6	2.80814	350	7441	2.8	0.35	0.35	7203
1104613	40	32	93	0.189678	0.530000	Intel-32t-2s	G	19200	207	5	2.30435	350	9354.65	2.8	0.35	0.35	8970
1104613	40	32	94	0.170979	0.510000	Intel-32t-2s	G	19200	205	5	2.53659	350	8356.3	2.8	0.35	0.35	8014
1104613	40	32	9	0.035783	0.450000	Intel-32t-2s	G	19200	2134	34	22.187	350	1799.4	2.8	0.35	0.35	1053
1104613	40	32	94	0.169255	0.510000	Intel-32t-2s	GUPDATE	19200	205	5	2.63902	350	8168.65	2.8	0.35	0.35	7826
1104613	40	32	94	0.075471	0.430000	Intel-32t-2s	GSTOP	19200	318	10	6.71698	350	3344.65	2.8	0.35	0.35	3153
1104613	40	32	94	0.168050	0.510000	Intel-32t-2s	GUPDATE	19200	205	5	2.63902	350	8168.65	2.8	0.35	0.35	7826
1104613	40	32	94	0.075100	0.430000	Intel-32t-2s	GSTOP	19200	318	10	6.71698	350	3344.65	2.8	0.35	0.35	3153
1104613	40	32	94	0.077740	0.430000	Intel-32t-2s	GSTOP_REFINEMENT	19200	289	10	6.45329	350	3309.55	2.8	0.35	0.35	3162
1104613	40	32	94	0.171440	0.520000	Intel-32t-2s	GUPDATE_REFINEMENT	19200	168	5	2.57143	350	8088.5	2.8	0.35	0.35	7826
1104613	40	32	94	0.076684	0.440000	Intel-32t-2s	GSTOP_REFINEMENT	19200	289	10	6.45329	350	3309.55	2.8	0.35	0.35	3162
1104613	40	32	94	0.173071	0.510000	Intel-32t-2s	GUPDATE_REFINEMENT	19200	168	5	2.57143	350	8088.5	2.8	0.35	0.35	7826
1104613	40	32	94	0.171403	0.510000	Intel-32t-2s	G	19200	205	5	2.53659	350	8356.3	2.8	0.35	0.35	8014
1104613	40	32	94	0.168521	0.510000	Intel-32t-2s	GUPDATE	19200	205	5	2.63902	350	8168.65	2.8	0.35	0.35	7826
1104613	40	32	94	0.078176	0.450000	Intel-32t-2s	GSTOP	19200	318	10	6.71698	350	3344.65	2.8	0.35	0.35	3153
1104613	40	32	94	0.078634	0.440000	Intel-32t-2s	GSTOP_REFINEMENT	19200	289	10	6.45329	350	3309.55	2.8	0.35	0.35	3162
1104613	40	32	94	0.172026	0.520000	Intel-32t-2s	GUPDATE_REFINEMENT	19200	168	5	2.57143	350	8088.5	2.8	0.35	0.35	7826
1104613	40	32	94	0.169614	0.500000	Intel-32t-2s	G	19200	205	5	2.53659	350	8356.3	2.8	0.35	0.35	8014
1104613	40	32	95	0.177145	0.530000	Intel-32t-2s	G	19200	203	6	2.73399	350	8329.5	2.8	0.35	0.35	7990
1104613	40	32	9	0.039442	0.450000	Intel-32t-2s	GUPDATE	19200	2134	32	20.0684	350	1875.55	2.8	0.35	0.35	1146
1104613	40	32	95	0.146014	0.490000	Intel-32t-2s	GUPDATE	19200	203	6	2.9803	350	6957.85	2.8	0.35	0.35	6660
1104613	40	32	95	0.074742	0.440000	Intel-32t-2s	GSTOP	19200	270	11	7.4037	350	3299.95	2.8	0.35	0.35	3138
1104613	40	32	95	0.144159	0.480000	Intel-32t-2s	GUPDATE	19200	203	6	2.9803	350	6957.85	2.8	0.35	0.35	6660
1104613	40	32	95	0.075961	0.440000	Intel-32t-2s	GSTOP	19200	270	11	7.4037	350	3299.95	2.8	0.35	0.35	3138
1104613	40	32	95	0.076750	0.440000	Intel-32t-2s	GSTOP_REFINEMENT	19200	254	11	7.3937	350	3273.9	2.8	0.35	0.35	3138
1104613	40	32	95	0.150530	0.490000	Intel-32t-2s	GUPDATE_REFINEMENT	19200	160	6	2.875	350	6887.5	2.8	0.35	0.35	6660
1104613	40	32	95	0.074033	0.440000	Intel-32t-2s	GSTOP_REFINEMENT	19200	254	11	7.3937	350	3273.9	2.8	0.35	0.35	3138
1104613	40	32	95	0.151251	0.490000	Intel-32t-2s	GUPDATE_REFINEMENT	19200	160	6	2.875	350	6887.5	2.8	0.35	0.35	6660
1104613	40	32	95	0.175385	0.520000	Intel-32t-2s	G	19200	203	6	2.73399	350	8329.5	2.8	0.35	0.35	7990
1104613	40	32	95	0.145033	0.490000	Intel-32t-2s	GUPDATE	19200	203	6	2.9803	350	6957.85	2.8	0.35	0.35	6660
1104613	40	32	95	0.074694	0.420000	Intel-32t-2s	GSTOP	19200	270	11	7.4037	350	3299.95	2.8	0.35	0.35	3138
1104613	40	32	95	0.078496	0.450000	Intel-32t-2s	GSTOP_REFINEMENT	19200	254	11	7.3937	350	3273.9	2.8	0.35	0.35	3138
1104613	40	32	95	0.149589	0.500000	Intel-32t-2s	GUPDATE_REFINEMENT	19200	160	6	2.875	350	6887.5	2.8	0.35	0.35	6660
1104613	40	32	95	0.171331	0.500000	Intel-32t-2s	G	19200	203	6	2.73399	350	8329.5	2.8	0.35	0.35	7990
1104613	40	32	96	0.186442	0.520000	Intel-32t-2s	G	19200	200	6	2.57	350	9194.95	2.8	0.35	0.35	8832
1104613	40	32	9	0.041286	0.600000	Intel-32t-2s	GSTOP	19200	2200	37	26.9709	350	1753	2.8	0.35	0.35	857
1104613	40	32	96	0.173767	0.510000	Intel-32t-2s	GUPDATE	19200	200	5	2.6	350	8397.55	2.8	0.35	0.35	8064
1104613	40	32	96	0.077385	0.440000	Intel-32t-2s	GSTOP	19200	268	11	6.63433	350	3545.7	2.8	0.35	0.35	3384
1104613	40	32	96	0.173643	0.510000	Intel-32t-2s	GUPDATE	19200	200	5	2.6	350	8397.55	2.8	0.35	0.35	8064
1104613	40	32	96	0.077099	0.430000	Intel-32t-2s	GSTOP	19200	268	11	6.63433	350	3545.7	2.8	0.35	0.35	3384
1104613	40	32	96	0.084832	0.450000	Intel-32t-2s	GSTOP_REFINEMENT	19200	249	11	6.69076	350	3518.95	2.8	0.35	0.35	3384
1104613	40	32	96	0.173452	0.510000	Intel-32t-2s	GUPDATE_REFINEMENT	19200	155	5	2.6	350	8304.1	2.8	0.35	0.35	8064
1104613	40	32	96	0.082704	0.440000	Intel-32t-2s	GSTOP_REFINEMENT	19200	249	11	6.69076	350	3518.95	2.8	0.35	0.35	3384
1104613	40	32	96	0.179693	0.530000	Intel-32t-2s	GUPDATE_REFINEMENT	19200	155	5	2.6	350	8304.1	2.8	0.35	0.35	8064
1104613	40	32	96	0.188129	0.530000	Intel-32t-2s	G	19200	200	6	2.57	350	9194.95	2.8	0.35	0.35	8832
1104613	40	32	96	0.170819	0.510000	Intel-32t-2s	GUPDATE	19200	200	5	2.6	350	8397.55	2.8	0.35	0.35	8064
1104613	40	32	96	0.081134	0.450000	Intel-32t-2s	GSTOP	19200	268	11	6.63433	350	3545.7	2.8	0.35	0.35	3384
1104613	40	32	96	0.078644	0.430000	Intel-32t-2s	GSTOP_REFINEMENT	19200	249	11	6.69076	350	3518.95	2.8	0.35	0.35	3384
1104613	40	32	96	0.175006	0.500000	Intel-32t-2s	GUPDATE_REFINEMENT	19200	155	5	2.6	350	8304.1	2.8	0.35	0.35	8064
1104613	40	32	96	0.185890	0.510000	Intel-32t-2s	G	19200	200	6	2.57	350	9194.95	2.8	0.35	0.35	8832
1104613	40	32	97	0.163517	0.500000	Intel-32t-2s	G	19200	198	6	2.72222	350	7980.4	2.8	0.35	0.35	7657
1104613	40	32	9	0.039207	0.490000	Intel-32t-2s	GSTOP_REFINEMENT	19200	1928	32	22.0591	350	1536.55	2.8	0.35	0.35	1118
1104613	40	32	97	0.167339	0.500000	Intel-32t-2s	GUPDATE	19200	198	6	2.69192	350	8181.75	2.8	0.35	0.35	7851
1104613	40	32	97	0.081959	0.450000	Intel-32t-2s	GSTOP	19200	292	10	6.61301	350	3605.2	2.8	0.35	0.35	3421
1104613	40	32	97	0.167107	0.510000	Intel-32t-2s	GUPDATE	19200	198	6	2.69192	350	8181.75	2.8	0.35	0.35	7851
1104613	40	32	97	0.080190	0.440000	Intel-32t-2s	GSTOP	19200	292	10	6.61301	350	3605.2	2.8	0.35	0.35	3421
1104613	40	32	97	0.080831	0.440000	Intel-32t-2s	GSTOP_REFINEMENT	19200	257	10	6.35798	350	3566.6	2.8	0.35	0.35	3437
1104613	40	32	97	0.173934	0.510000	Intel-32t-2s	GUPDATE_REFINEMENT	19200	146	6	2.67123	350	8075.35	2.8	0.35	0.35	7851
1104613	40	32	97	0.079380	0.430000	Intel-32t-2s	GSTOP_REFINEMENT	19200	257	10	6.35798	350	3566.6	2.8	0.35	0.35	3437
1104613	40	32	97	0.174274	0.520000	Intel-32t-2s	GUPDATE_REFINEMENT	19200	146	6	2.67123	350	8075.35	2.8	0.35	0.35	7851
1104613	40	32	97	0.165184	0.510000	Intel-32t-2s	G	19200	198	6	2.72222	350	7980.4	2.8	0.35	0.35	7657
1104613	40	32	97	0.167629	0.510000	Intel-32t-2s	GUPDATE	19200	198	6	2.69192	350	8181.75	2.8	0.35	0.35	7851
1104613	40	32	97	0.082519	0.450000	Intel-32t-2s	GSTOP	19200	292	10	6.61301	350	3605.2	2.8	0.35	0.35	3421
1104613	40	32	97	0.079493	0.430000	Intel-32t-2s	GSTOP_REFINEMENT	19200	257	10	6.35798	350	3566.6	2.8	0.35	0.35	3437
1104613	40	32	97	0.173752	0.510000	Intel-32t-2s	GUPDATE_REFINEMENT	19200	146	6	2.67123	350	8075.35	2.8	0.35	0.35	7851
1104613	40	32	97	0.168290	0.500000	Intel-32t-2s	G	19200	198	6	2.72222	350	7980.4	2.8	0.35	0.35	7657
1104613	40	32	98	0.175878	0.500000	Intel-32t-2s	G	19200	196	6	2.64286	350	8859.6	2.8	0.35	0.35	8518
1104613	40	32	9	0.040521	0.440000	Intel-32t-2s	GUPDATE_REFINEMENT	19200	1888	29	18.7595	350	1728.1	2.8	0.35	0.35	1281
1104613	40	32	98	0.162373	0.500000	Intel-32t-2s	GUPDATE	19200	196	6	2.87245	350	7846.7	2.8	0.35	0.35	7538
1104613	40	32	98	0.072838	0.430000	Intel-32t-2s	GSTOP	19200	283	10	7.20848	350	3213.95	2.8	0.35	0.35	3054
1104613	40	32	98	0.164083	0.510000	Intel-32t-2s	GUPDATE	19200	196	6	2.87245	350	7846.7	2.8	0.35	0.35	7538
1104613	40	32	98	0.075306	0.430000	Intel-32t-2s	GSTOP	19200	283	10	7.20848	350	3213.95	2.8	0.35	0.35	3054
1104613	40	32	98	0.072389	0.430000	Intel-32t-2s	GSTOP_REFINEMENT	19200	257	9	6.74319	350	3183.85	2.8	0.35	0.35	3061
1104613	40	32	98	0.163632	0.510000	Intel-32t-2s	GUPDATE_REFINEMENT	19200	146	6	2.97945	350	7735.4	2.8	0.35	0.35	7538
1104613	40	32	98	0.074081	0.430000	Intel-32t-2s	GSTOP_REFINEMENT	19200	257	9	6.74319	350	3183.85	2.8	0.35	0.35	3061
1104613	40	32	98	0.164651	0.510000	Intel-32t-2s	GUPDATE_REFINEMENT	19200	146	6	2.97945	350	7735.4	2.8	0.35	0.35	7538
1104613	40	32	98	0.179758	0.530000	Intel-32t-2s	G	19200	196	6	2.64286	350	8859.6	2.8	0.35	0.35	8518
1104613	40	32	98	0.160935	0.510000	Intel-32t-2s	GUPDATE	19200	196	6	2.87245	350	7846.7	2.8	0.35	0.35	7538
1104613	40	32	98	0.069521	0.420000	Intel-32t-2s	GSTOP	19200	283	10	7.20848	350	3213.95	2.8	0.35	0.35	3054
1104613	40	32	98	0.074230	0.440000	Intel-32t-2s	GSTOP_REFINEMENT	19200	257	9	6.74319	350	3183.85	2.8	0.35	0.35	3061
1104613	40	32	98	0.166148	0.510000	Intel-32t-2s	GUPDATE_REFINEMENT	19200	146	6	2.97945	350	7735.4	2.8	0.35	0.35	7538
1104613	40	32	98	0.179589	0.510000	Intel-32t-2s	G	19200	196	6	2.64286	350	8859.6	2.8	0.35	0.35	8518
1104613	40	32	99	0.156488	0.490000	Intel-32t-2s	G	19200	194	6	2.96392	350	7621.35	2.8	0.35	0.35	7320
1104613	40	32	9	0.038916	0.480000	Intel-32t-2s	G	19200	2134	34	22.187	350	1799.4	2.8	0.35	0.35	1053
1104613	40	32	99	0.124024	0.460000	Intel-32t-2s	GUPDATE	19200	194	6	3.65464	350	5971.95	2.8	0.35	0.35	5742
1104613	40	32	99	0.070582	0.430000	Intel-32t-2s	GSTOP	19200	220	10	6.60909	350	2922.9	2.8	0.35	0.35	2781
1104613	40	32	99	0.124062	0.480000	Intel-32t-2s	GUPDATE	19200	194	6	3.65464	350	5971.95	2.8	0.35	0.35	5742
1104613	40	32	99	0.072921	0.430000	Intel-32t-2s	GSTOP	19200	220	10	6.60909	350	2922.9	2.8	0.35	0.35	2781
1104613	40	32	99	0.069127	0.430000	Intel-32t-2s	GSTOP_REFINEMENT	19200	204	9	6.56373	350	2907.15	2.8	0.35	0.35	2799
1104613	40	32	99	0.128460	0.470000	Intel-32t-2s	GUPDATE_REFINEMENT	19200	154	6	3.49351	350	5914.55	2.8	0.35	0.35	5742
1104613	40	32	99	0.071195	0.430000	Intel-32t-2s	GSTOP_REFINEMENT	19200	204	9	6.56373	350	2907.15	2.8	0.35	0.35	2799
1104613	40	32	99	0.131101	0.460000	Intel-32t-2s	GUPDATE_REFINEMENT	19200	154	6	3.49351	350	5914.55	2.8	0.35	0.35	5742
1104613	40	32	99	0.159964	0.510000	Intel-32t-2s	G	19200	194	6	2.96392	350	7621.35	2.8	0.35	0.35	7320
1104613	40	32	99	0.124601	0.470000	Intel-32t-2s	GUPDATE	19200	194	6	3.65464	350	5971.95	2.8	0.35	0.35	5742
1104613	40	32	99	0.071374	0.430000	Intel-32t-2s	GSTOP	19200	220	10	6.60909	350	2922.9	2.8	0.35	0.35	2781
1104613	40	32	99	0.071791	0.430000	Intel-32t-2s	GSTOP_REFINEMENT	19200	204	9	6.56373	350	2907.15	2.8	0.35	0.35	2799
1104613	40	32	99	0.128787	0.460000	Intel-32t-2s	GUPDATE_REFINEMENT	19200	154	6	3.49351	350	5914.55	2.8	0.35	0.35	5742
1104613	40	32	99	0.157822	0.490000	Intel-32t-2s	G	19200	194	6	2.96392	350	7621.35	2.8	0.35	0.35	7320
1104613	60	32	1	0.604188	13.820000	Intel-32t-2s	G	43200	43200	180	139.422	350	30258.4	2.8	0.35	0.35	1377
1104613	60	32	10	0.116324	1.170000	Intel-32t-2s	G	43200	4320	25	14.7407	350	4860.75	2.8	0.35	0.35	3360
1104613	60	32	1	0.211040	4.410000	Intel-32t-2s	GUPDATE	43200	43200	180	139.422	350	30258.4	2.8	0.35	0.35	1377
1104613	60	32	10	0.111460	1.150000	Intel-32t-2s	GUPDATE	43200	4320	25	14.1481	350	5000	2.8	0.35	0.35	3470
1104613	60	32	10	0.082684	1.220000	Intel-32t-2s	GSTOP	43200	6179	34	25.2275	350	4613.4	2.8	0.35	0.35	2069
1104613	60	32	10	0.123476	1.200000	Intel-32t-2s	GUPDATE	43200	4320	25	14.1481	350	5000	2.8	0.35	0.35	3470
1104613	60	32	10	0.082244	1.200000	Intel-32t-2s	GSTOP	43200	6179	34	25.2275	350	4613.4	2.8	0.35	0.35	2069
1104613	60	32	10	0.083217	1.220000	Intel-32t-2s	GSTOP_REFINEMENT	43200	6003	34	24.4133	350	4453.8	2.8	0.35	0.35	2138
1104613	60	32	10	0.114648	1.160000	Intel-32t-2s	GUPDATE_REFINEMENT	43200	3870	23	13.6457	350	4679.55	2.8	0.35	0.35	3510
1104613	60	32	10	0.119901	1.180000	Intel-32t-2s	G	43200	4320	25	14.7407	350	4860.75	2.8	0.35	0.35	3360
1104613	60	32	10	0.121738	1.180000	Intel-32t-2s	GUPDATE	43200	4320	25	14.1481	350	5000	2.8	0.35	0.35	3470
1104613	60	32	10	0.106300	1.530000	Intel-32t-2s	GSTOP	43200	6179	34	25.2275	350	4613.4	2.8	0.35	0.35	2069
1104613	60	32	10	0.081796	1.220000	Intel-32t-2s	GSTOP_REFINEMENT	43200	6003	34	24.4133	350	4453.8	2.8	0.35	0.35	2138
1104613	60	32	10	0.113615	1.130000	Intel-32t-2s	GUPDATE_REFINEMENT	43200	3870	23	13.6457	350	4679.55	2.8	0.35	0.35	3510
1104613	60	32	10	0.127742	1.330000	Intel-32t-2s	G	43200	4320	25	14.7407	350	4860.75	2.8	0.35	0.35	3360
1104613	60	32	11	0.141339	1.240000	Intel-32t-2s	G	43200	3928	21	12.3136	350	5591.25	2.8	0.35	0.35	3963
1104613	60	32	1	0.602871	13.730000	Intel-32t-2s	GSTOP	43200	43200	180	139.422	350	30258.4	2.8	0.35	0.35	1377
1104613	60	32	1	0.328713	7.230000	Intel-32t-2s	GUPDATE	43200	43200	180	139.422	350	30258.4	2.8	0.35	0.35	1377
1104613	60	32	11	0.122550	1.150000	Intel-32t-2s	GUPDATE	43200	3928	23	12.8108	350	5344.9	2.8	0.35	0.35	3820
1104613	60	32	1	0.576284	13.140000	Intel-32t-2s	GSTOP	43200	43200	180	139.422	350	30258.4	2.8	0.35	0.35	1377
1104613	60	32	11	0.083155	1.190000	Intel-32t-2s	GSTOP	43200	5473	36	26.5635	350	4135.05	2.8	0.35	0.35	2009
1104613	60	32	11	0.122988	1.170000	Intel-32t-2s	GUPDATE	43200	3928	23	12.8108	350	5344.9	2.8	0.35	0.35	3820
1104613	60	32	11	0.082572	1.190000	Intel-32t-2s	GSTOP	43200	5473	36	26.5635	350	4135.05	2.8	0.35	0.35	2009
1104613	60	32	11	0.081347	1.210000	Intel-32t-2s	GSTOP_REFINEMENT	43200	5223	36	25.2443	350	3931.95	2.8	0.35	0.35	2090
1104613	60	32	11	0.124311	1.140000	Intel-32t-2s	GUPDATE_REFINEMENT	43200	3489	22	12.7865	350	5009.8	2.8	0.35	0.35	3875
1104613	60	32	11	0.133867	1.180000	Intel-32t-2s	G	43200	3928	21	12.3136	350	5591.25	2.8	0.35	0.35	3963
1104613	60	32	11	0.131106	1.180000	Intel-32t-2s	GUPDATE	43200	3928	23	12.8108	350	5344.9	2.8	0.35	0.35	3820
1104613	60	32	11	0.093379	1.350000	Intel-32t-2s	GSTOP	43200	5473	36	26.5635	350	4135.05	2.8	0.35	0.35	2009
1104613	60	32	11	0.081474	1.190000	Intel-32t-2s	GSTOP_REFINEMENT	43200	5223	36	25.2443	350	3931.95	2.8	0.35	0.35	2090
1104613	60	32	11	0.124564	1.130000	Intel-32t-2s	GUPDATE_REFINEMENT	43200	3489	22	12.7865	350	5009.8	2.8	0.35	0.35	3875
1104613	60	32	11	0.137401	1.200000	Intel-32t-2s	G	43200	3928	21	12.3136	350	5591.25	2.8	0.35	0.35	3963
1104613	60	32	12	0.068655	1.170000	Intel-32t-2s	G	43200	3600	48	35.6183	350	2853.65	2.8	0.35	0.35	1572
1104613	60	32	1	0.349483	7.570000	Intel-32t-2s	GSTOP_REFINEMENT	43200	31786	128	73.6864	350	22271.2	2.8	0.35	0.35	1444
1104613	60	32	12	0.070658	1.150000	Intel-32t-2s	GUPDATE	43200	3600	48	35.6183	350	2853.65	2.8	0.35	0.35	1572
1104613	60	32	12	0.070956	1.170000	Intel-32t-2s	GSTOP	43200	3600	48	35.6183	350	2853.65	2.8	0.35	0.35	1572
1104613	60	32	12	0.069074	1.160000	Intel-32t-2s	GUPDATE	43200	3600	48	35.6183	350	2853.65	2.8	0.35	0.35	1572
1104613	60	32	12	0.071904	1.150000	Intel-32t-2s	GSTOP	43200	3600	48	35.6183	350	2853.65	2.8	0.35	0.35	1572
1104613	60	32	12	0.071864	1.150000	Intel-32t-2s	GSTOP_REFINEMENT	43200	3366	43	31.7923	350	2563.55	2.8	0.35	0.35	1668
1104613	60	32	12	0.080797	1.170000	Intel-32t-2s	GUPDATE_REFINEMENT	43200	3345	44	31.6069	350	2557	2.8	0.35	0.35	1668
1104613	60	32	12	0.072450	1.150000	Intel-32t-2s	G	43200	3600	48	35.6183	350	2853.65	2.8	0.35	0.35	1572
1104613	60	32	12	0.069708	1.170000	Intel-32t-2s	GUPDATE	43200	3600	48	35.6183	350	2853.65	2.8	0.35	0.35	1572
1104613	60	32	12	0.071362	1.150000	Intel-32t-2s	GSTOP	43200	3600	48	35.6183	350	2853.65	2.8	0.35	0.35	1572
1104613	60	32	12	0.069255	1.160000	Intel-32t-2s	GSTOP_REFINEMENT	43200	3366	43	31.7923	350	2563.55	2.8	0.35	0.35	1668
1104613	60	32	12	0.073612	1.200000	Intel-32t-2s	GUPDATE_REFINEMENT	43200	3345	44	31.6069	350	2557	2.8	0.35	0.35	1668
1104613	60	32	12	0.072850	1.260000	Intel-32t-2s	G	43200	3600	48	35.6183	350	2853.65	2.8	0.35	0.35	1572
1104613	60	32	13	0.126632	1.140000	Intel-32t-2s	G	43200	3324	22	11.2485	350	5805.2	2.8	0.35	0.35	4330
1104613	60	32	1	0.367601	8.120000	Intel-32t-2s	GUPDATE_REFINEMENT	43200	32203	146	76.7063	350	22563.5	2.8	0.35	0.35	1473
1104613	60	32	13	0.146306	1.180000	Intel-32t-2s	GUPDATE	43200	3324	19	10.6664	350	6084.4	2.8	0.35	0.35	4590
1104613	60	32	13	0.096400	1.110000	Intel-32t-2s	GSTOP	43200	4220	27	18.3595	350	3970.8	2.8	0.35	0.35	2813
1104613	60	32	13	0.133502	1.130000	Intel-32t-2s	GUPDATE	43200	3324	19	10.6664	350	6084.4	2.8	0.35	0.35	4590
1104613	60	32	13	0.106814	1.270000	Intel-32t-2s	GSTOP	43200	4220	27	18.3595	350	3970.8	2.8	0.35	0.35	2813
1104613	60	32	13	0.089796	1.080000	Intel-32t-2s	GSTOP_REFINEMENT	43200	4133	27	18.2707	350	3857.7	2.8	0.35	0.35	2826
1104613	60	32	13	0.135440	1.110000	Intel-32t-2s	GUPDATE_REFINEMENT	43200	2918	19	10.8585	350	5703.2	2.8	0.35	0.35	4603
1104613	60	32	13	0.127006	1.130000	Intel-32t-2s	G	43200	3324	22	11.2485	350	5805.2	2.8	0.35	0.35	4330
1104613	60	32	13	0.133591	1.130000	Intel-32t-2s	GUPDATE	43200	3324	19	10.6664	350	6084.4	2.8	0.35	0.35	4590
1104613	60	32	13	0.104838	1.130000	Intel-32t-2s	GSTOP	43200	4220	27	18.3595	350	3970.8	2.8	0.35	0.35	2813
1104613	60	32	13	0.092222	1.110000	Intel-32t-2s	GSTOP_REFINEMENT	43200	4133	27	18.2707	350	3857.7	2.8	0.35	0.35	2826
1104613	60	32	13	0.136960	1.100000	Intel-32t-2s	GUPDATE_REFINEMENT	43200	2918	19	10.8585	350	5703.2	2.8	0.35	0.35	4603
1104613	60	32	13	0.127398	1.130000	Intel-32t-2s	G	43200	3324	22	11.2485	350	5805.2	2.8	0.35	0.35	4330
1104613	60	32	14	0.131703	1.130000	Intel-32t-2s	G	43200	3086	20	10.8046	350	5849.4	2.8	0.35	0.35	4462
1104613	60	32	1	0.477619	10.790000	Intel-32t-2s	G	43200	43200	180	139.422	350	30258.4	2.8	0.35	0.35	1377
1104613	60	32	14	0.132452	1.110000	Intel-32t-2s	GUPDATE	43200	3086	19	10.4763	350	6070.95	2.8	0.35	0.35	4630
1104613	60	32	14	0.085630	1.170000	Intel-32t-2s	GSTOP	43200	4217	38	24.6256	350	3407.9	2.8	0.35	0.35	2010
1104613	60	32	14	0.135504	1.150000	Intel-32t-2s	GUPDATE	43200	3086	19	10.4763	350	6070.95	2.8	0.35	0.35	4630
1104613	60	32	14	0.083835	1.160000	Intel-32t-2s	GSTOP	43200	4217	38	24.6256	350	3407.9	2.8	0.35	0.35	2010
1104613	60	32	14	0.078431	1.190000	Intel-32t-2s	GSTOP_REFINEMENT	43200	4123	39	24.4278	350	3327.4	2.8	0.35	0.35	2062
1104613	60	32	14	0.141028	1.130000	Intel-32t-2s	GUPDATE_REFINEMENT	43200	2671	19	10.438	350	5677.9	2.8	0.35	0.35	4658
1104613	60	32	14	0.129943	1.130000	Intel-32t-2s	G	43200	3086	20	10.8046	350	5849.4	2.8	0.35	0.35	4462
1104613	60	32	14	0.131198	1.120000	Intel-32t-2s	GUPDATE	43200	3086	19	10.4763	350	6070.95	2.8	0.35	0.35	4630
1104613	60	32	14	0.078016	1.200000	Intel-32t-2s	GSTOP	43200	4217	38	24.6256	350	3407.9	2.8	0.35	0.35	2010
1104613	60	32	14	0.074825	1.200000	Intel-32t-2s	GSTOP_REFINEMENT	43200	4123	39	24.4278	350	3327.4	2.8	0.35	0.35	2062
1104613	60	32	14	0.150255	1.150000	Intel-32t-2s	GUPDATE_REFINEMENT	43200	2671	19	10.438	350	5677.9	2.8	0.35	0.35	4658
1104613	60	32	14	0.130885	1.130000	Intel-32t-2s	G	43200	3086	20	10.8046	350	5849.4	2.8	0.35	0.35	4462
1104613	60	32	15	0.120229	1.100000	Intel-32t-2s	G	43200	2880	24	12.1361	350	5298.3	2.8	0.35	0.35	4095
1104613	60	32	1	0.553937	12.310000	Intel-32t-2s	GUPDATE	43200	43200	180	139.422	350	30258.4	2.8	0.35	0.35	1377
1104613	60	32	15	0.109015	1.110000	Intel-32t-2s	GUPDATE	43200	2880	36	16.0253	350	4701.35	2.8	0.35	0.35	3630
1104613	60	32	15	0.078766	1.190000	Intel-32t-2s	GSTOP	43200	2984	33	20.6917	350	2600.7	2.8	0.35	0.35	1818
1104613	60	32	15	0.112251	1.110000	Intel-32t-2s	GUPDATE	43200	2880	36	16.0253	350	4701.35	2.8	0.35	0.35	3630
1104613	60	32	15	0.077365	1.180000	Intel-32t-2s	GSTOP	43200	2984	33	20.6917	350	2600.7	2.8	0.35	0.35	1818
1104613	60	32	15	0.078026	1.130000	Intel-32t-2s	GSTOP_REFINEMENT	43200	2881	33	22.882	350	2537.65	2.8	0.35	0.35	1968
1104613	60	32	15	0.119025	1.180000	Intel-32t-2s	GUPDATE_REFINEMENT	43200	2584	33	15.9412	350	4447.35	2.8	0.35	0.35	3675
1104613	60	32	15	0.119440	1.110000	Intel-32t-2s	G	43200	2880	24	12.1361	350	5298.3	2.8	0.35	0.35	4095
1104613	60	32	15	0.118037	1.130000	Intel-32t-2s	GUPDATE	43200	2880	36	16.0253	350	4701.35	2.8	0.35	0.35	3630
1104613	60	32	15	0.075917	1.150000	Intel-32t-2s	GSTOP	43200	2984	33	20.6917	350	2600.7	2.8	0.35	0.35	1818
1104613	60	32	15	0.077518	1.150000	Intel-32t-2s	GSTOP_REFINEMENT	43200	2881	33	22.882	350	2537.65	2.8	0.35	0.35	1968
1104613	60	32	15	0.113904	1.110000	Intel-32t-2s	GUPDATE_REFINEMENT	43200	2584	33	15.9412	350	4447.35	2.8	0.35	0.35	3675
1104613	60	32	15	0.123195	1.120000	Intel-32t-2s	G	43200	2880	24	12.1361	350	5298.3	2.8	0.35	0.35	4095
1104613	60	32	16	0.071213	1.150000	Intel-32t-2s	G	43200	2700	45	34.4389	350	2361.85	2.8	0.35	0.35	1632
1104613	60	32	1	0.536350	11.620000	Intel-32t-2s	GSTOP	43200	43200	180	139.422	350	30258.4	2.8	0.35	0.35	1377
1104613	60	32	16	0.071431	1.140000	Intel-32t-2s	GUPDATE	43200	2700	45	34.4389	350	2361.85	2.8	0.35	0.35	1632
1104613	60	32	16	0.076481	1.180000	Intel-32t-2s	GSTOP	43200	2700	45	34.4389	350	2361.85	2.8	0.35	0.35	1632
1104613	60	32	16	0.068546	1.190000	Intel-32t-2s	GUPDATE	43200	2700	45	34.4389	350	2361.85	2.8	0.35	0.35	1632
1104613	60	32	16	0.072885	1.180000	Intel-32t-2s	GSTOP	43200	2700	45	34.4389	350	2361.85	2.8	0.35	0.35	1632
1104613	60	32	16	0.072332	1.110000	Intel-32t-2s	GSTOP_REFINEMENT	43200	2590	39	29.9861	350	2240.25	2.8	0.35	0.35	1824
1104613	60	32	16	0.073402	1.130000	Intel-32t-2s	GUPDATE_REFINEMENT	43200	2554	39	29.5904	350	2225.25	2.8	0.35	0.35	1824
1104613	60	32	16	0.072280	1.140000	Intel-32t-2s	G	43200	2700	45	34.4389	350	2361.85	2.8	0.35	0.35	1632
1104613	60	32	16	0.073189	1.150000	Intel-32t-2s	GUPDATE	43200	2700	45	34.4389	350	2361.85	2.8	0.35	0.35	1632
1104613	60	32	16	0.069603	1.160000	Intel-32t-2s	GSTOP	43200	2700	45	34.4389	350	2361.85	2.8	0.35	0.35	1632
1104613	60	32	16	0.070519	1.130000	Intel-32t-2s	GSTOP_REFINEMENT	43200	2590	39	29.9861	350	2240.25	2.8	0.35	0.35	1824
1104613	60	32	16	0.072517	1.140000	Intel-32t-2s	GUPDATE_REFINEMENT	43200	2554	39	29.5904	350	2225.25	2.8	0.35	0.35	1824
1104613	60	32	16	0.070092	1.160000	Intel-32t-2s	G	43200	2700	45	34.4389	350	2361.85	2.8	0.35	0.35	1632
1104613	60	32	17	0.137116	1.120000	Intel-32t-2s	G	43200	2542	16	9.83006	350	6132.3	2.8	0.35	0.35	4865
1104613	60	32	1	0.170211	3.360000	Intel-32t-2s	GSTOP_REFINEMENT	43200	31786	128	73.6864	350	22271.2	2.8	0.35	0.35	1444
1104613	60	32	17	0.130062	1.100000	Intel-32t-2s	GUPDATE	43200	2542	20	10.6003	350	5752.55	2.8	0.35	0.35	4593
1104613	60	32	17	0.102910	1.120000	Intel-32t-2s	GSTOP	43200	3680	26	18.7614	350	3774.65	2.8	0.35	0.35	2858
1104613	60	32	17	0.128844	1.100000	Intel-32t-2s	GUPDATE	43200	2542	20	10.6003	350	5752.55	2.8	0.35	0.35	4593
1104613	60	32	17	0.099384	1.130000	Intel-32t-2s	GSTOP	43200	3680	26	18.7614	350	3774.65	2.8	0.35	0.35	2858
1104613	60	32	17	0.093339	1.140000	Intel-32t-2s	GSTOP_REFINEMENT	43200	3642	27	18.656	350	3718.35	2.8	0.35	0.35	2862
1104613	60	32	17	0.135616	1.100000	Intel-32t-2s	GUPDATE_REFINEMENT	43200	2269	19	10.5738	350	5486.4	2.8	0.35	0.35	4610
1104613	60	32	17	0.138989	1.140000	Intel-32t-2s	G	43200	2542	16	9.83006	350	6132.3	2.8	0.35	0.35	4865
1104613	60	32	17	0.129061	1.090000	Intel-32t-2s	GUPDATE	43200	2542	20	10.6003	350	5752.55	2.8	0.35	0.35	4593
1104613	60	32	17	0.096034	1.150000	Intel-32t-2s	GSTOP	43200	3680	26	18.7614	350	3774.65	2.8	0.35	0.35	2858
1104613	60	32	17	0.094873	1.100000	Intel-32t-2s	GSTOP_REFINEMENT	43200	3642	27	18.656	350	3718.35	2.8	0.35	0.35	2862
1104613	60	32	17	0.135805	1.110000	Intel-32t-2s	GUPDATE_REFINEMENT	43200	2269	19	10.5738	350	5486.4	2.8	0.35	0.35	4610
1104613	60	32	17	0.139534	1.120000	Intel-32t-2s	G	43200	2542	16	9.83006	350	6132.3	2.8	0.35	0.35	4865
1104613	60	32	18	0.146207	1.120000	Intel-32t-2s	G	43200	2400	18	9.34625	350	6491.2	2.8	0.35	0.35	5220
1104613	60	32	1	0.180165	3.360000	Intel-32t-2s	GUPDATE_REFINEMENT	43200	32203	146	76.7063	350	22563.5	2.8	0.35	0.35	1473
1104613	60	32	18	0.144132	1.120000	Intel-32t-2s	GUPDATE	43200	2400	17	9.44292	350	6418.85	2.8	0.35	0.35	5148
1104613	60	32	18	0.088841	1.110000	Intel-32t-2s	GSTOP	43200	3049	26	20.8088	350	3036.7	2.8	0.35	0.35	2286
1104613	60	32	18	0.146835	1.110000	Intel-32t-2s	GUPDATE	43200	2400	17	9.44292	350	6418.85	2.8	0.35	0.35	5148
1104613	60	32	18	0.083004	1.120000	Intel-32t-2s	GSTOP	43200	3049	26	20.8088	350	3036.7	2.8	0.35	0.35	2286
1104613	60	32	18	0.081719	1.110000	Intel-32t-2s	GSTOP_REFINEMENT	43200	2973	25	20.6054	350	2950.9	2.8	0.35	0.35	2320
1104613	60	32	18	0.147515	1.100000	Intel-32t-2s	GUPDATE_REFINEMENT	43200	2086	17	9.3581	350	6073.95	2.8	0.35	0.35	5166
1104613	60	32	18	0.145665	1.120000	Intel-32t-2s	G	43200	2400	18	9.34625	350	6491.2	2.8	0.35	0.35	5220
1104613	60	32	18	0.143303	1.110000	Intel-32t-2s	GUPDATE	43200	2400	17	9.44292	350	6418.85	2.8	0.35	0.35	5148
1104613	60	32	18	0.084660	1.110000	Intel-32t-2s	GSTOP	43200	3049	26	20.8088	350	3036.7	2.8	0.35	0.35	2286
1104613	60	32	18	0.081697	1.080000	Intel-32t-2s	GSTOP_REFINEMENT	43200	2973	25	20.6054	350	2950.9	2.8	0.35	0.35	2320
1104613	60	32	18	0.147524	1.100000	Intel-32t-2s	GUPDATE_REFINEMENT	43200	2086	17	9.3581	350	6073.95	2.8	0.35	0.35	5166
1104613	60	32	18	0.149770	1.130000	Intel-32t-2s	G	43200	2400	18	9.34625	350	6491.2	2.8	0.35	0.35	5220
1104613	60	32	19	0.144633	1.110000	Intel-32t-2s	G	43200	2274	16	9.15699	350	6443.3	2.8	0.35	0.35	5219
1104613	60	32	1	0.204632	4.290000	Intel-32t-2s	G	43200	43200	180	139.422	350	30258.4	2.8	0.35	0.35	1377
1104613	60	32	19	0.142450	1.120000	Intel-32t-2s	GUPDATE	43200	2274	16	9.78364	350	6083.4	2.8	0.35	0.35	4934
1104613	60	32	19	0.085448	1.190000	Intel-32t-2s	GSTOP	43200	3317	33	22.7326	350	3076.85	2.8	0.35	0.35	2283
1104613	60	32	19	0.138843	1.110000	Intel-32t-2s	GUPDATE	43200	2274	16	9.78364	350	6083.4	2.8	0.35	0.35	4934
1104613	60	32	19	0.090492	1.130000	Intel-32t-2s	GSTOP	43200	3317	33	22.7326	350	3076.85	2.8	0.35	0.35	2283
1104613	60	32	19	0.083918	1.100000	Intel-32t-2s	GSTOP_REFINEMENT	43200	3254	32	22.3165	350	3008.9	2.8	0.35	0.35	2326
1104613	60	32	19	0.143940	1.100000	Intel-32t-2s	GUPDATE_REFINEMENT	43200	2034	16	9.72566	350	5795.25	2.8	0.35	0.35	4953
1104613	60	32	19	0.145987	1.120000	Intel-32t-2s	G	43200	2274	16	9.15699	350	6443.3	2.8	0.35	0.35	5219
1104613	60	32	19	0.141351	1.130000	Intel-32t-2s	GUPDATE	43200	2274	16	9.78364	350	6083.4	2.8	0.35	0.35	4934
1104613	60	32	19	0.095508	1.140000	Intel-32t-2s	GSTOP	43200	3317	33	22.7326	350	3076.85	2.8	0.35	0.35	2283
1104613	60	32	19	0.090237	1.240000	Intel-32t-2s	GSTOP_REFINEMENT	43200	3254	32	22.3165	350	3008.9	2.8	0.35	0.35	2326
1104613	60	32	19	0.142707	1.100000	Intel-32t-2s	GUPDATE_REFINEMENT	43200	2034	16	9.72566	350	5795.25	2.8	0.35	0.35	4953
1104613	60	32	19	0.153822	1.150000	Intel-32t-2s	G	43200	2274	16	9.15699	350	6443.3	2.8	0.35	0.35	5219
1104613	60	32	2	0.111767	2.180000	Intel-32t-2s	G	43200	21600	105	75.0092	350	15162.4	2.8	0.35	0.35	1394
1104613	60	32	20	0.069012	1.120000	Intel-32t-2s	G	43200	2160	38	28.1019	350	2130.55	2.8	0.35	0.35	1780
1104613	60	32	2	0.109494	2.120000	Intel-32t-2s	GUPDATE	43200	21600	105	75.0092	350	15162.4	2.8	0.35	0.35	1394
1104613	60	32	20	0.071591	1.130000	Intel-32t-2s	GUPDATE	43200	2160	38	28.1019	350	2130.55	2.8	0.35	0.35	1780
1104613	60	32	20	0.069708	1.150000	Intel-32t-2s	GSTOP	43200	2160	38	28.1019	350	2130.55	2.8	0.35	0.35	1780
1104613	60	32	20	0.071649	1.100000	Intel-32t-2s	GUPDATE	43200	2160	38	28.1019	350	2130.55	2.8	0.35	0.35	1780
1104613	60	32	20	0.070477	1.130000	Intel-32t-2s	GSTOP	43200	2160	38	28.1019	350	2130.55	2.8	0.35	0.35	1780
1104613	60	32	20	0.071689	1.130000	Intel-32t-2s	GSTOP_REFINEMENT	43200	2146	37	27.9124	350	2108.55	2.8	0.35	0.35	1800
1104613	60	32	20	0.070137	1.110000	Intel-32t-2s	GUPDATE_REFINEMENT	43200	2146	37	27.9124	350	2108.55	2.8	0.35	0.35	1800
1104613	60	32	20	0.073820	1.130000	Intel-32t-2s	G	43200	2160	38	28.1019	350	2130.55	2.8	0.35	0.35	1780
1104613	60	32	20	0.069456	1.140000	Intel-32t-2s	GUPDATE	43200	2160	38	28.1019	350	2130.55	2.8	0.35	0.35	1780
1104613	60	32	20	0.068752	1.120000	Intel-32t-2s	GSTOP	43200	2160	38	28.1019	350	2130.55	2.8	0.35	0.35	1780
1104613	60	32	20	0.070956	1.130000	Intel-32t-2s	GSTOP_REFINEMENT	43200	2146	37	27.9124	350	2108.55	2.8	0.35	0.35	1800
1104613	60	32	20	0.073944	1.120000	Intel-32t-2s	GUPDATE_REFINEMENT	43200	2146	37	27.9124	350	2108.55	2.8	0.35	0.35	1800
1104613	60	32	20	0.071284	1.120000	Intel-32t-2s	G	43200	2160	38	28.1019	350	2130.55	2.8	0.35	0.35	1780
1104613	60	32	21	0.145785	1.110000	Intel-32t-2s	G	43200	2058	17	9.01361	350	6403.8	2.8	0.35	0.35	5274
1104613	60	32	2	0.269664	5.370000	Intel-32t-2s	GSTOP	43200	21600	105	75.0092	350	15162.4	2.8	0.35	0.35	1394
1104613	60	32	2	0.266727	5.460000	Intel-32t-2s	GUPDATE	43200	21600	105	75.0092	350	15162.4	2.8	0.35	0.35	1394
1104613	60	32	21	0.147987	1.110000	Intel-32t-2s	GUPDATE	43200	2058	18	9.19922	350	6430.75	2.8	0.35	0.35	5316
1104613	60	32	2	0.193071	3.990000	Intel-32t-2s	GSTOP	43200	21600	105	75.0092	350	15162.4	2.8	0.35	0.35	1394
1104613	60	32	21	0.111964	1.080000	Intel-32t-2s	GSTOP	43200	2655	21	14.5043	350	4183.25	2.8	0.35	0.35	3412
1104613	60	32	21	0.146155	1.100000	Intel-32t-2s	GUPDATE	43200	2058	18	9.19922	350	6430.75	2.8	0.35	0.35	5316
1104613	60	32	21	0.103469	1.050000	Intel-32t-2s	GSTOP	43200	2655	21	14.5043	350	4183.25	2.8	0.35	0.35	3412
1104613	60	32	21	0.104464	1.070000	Intel-32t-2s	GSTOP_REFINEMENT	43200	2593	21	14.5924	350	4131.65	2.8	0.35	0.35	3419
1104613	60	32	21	0.149854	1.100000	Intel-32t-2s	GUPDATE_REFINEMENT	43200	1780	16	9.10337	350	6127.3	2.8	0.35	0.35	5337
1104613	60	32	21	0.143548	1.090000	Intel-32t-2s	G	43200	2058	17	9.01361	350	6403.8	2.8	0.35	0.35	5274
1104613	60	32	21	0.147441	1.110000	Intel-32t-2s	GUPDATE	43200	2058	18	9.19922	350	6430.75	2.8	0.35	0.35	5316
1104613	60	32	21	0.109301	1.100000	Intel-32t-2s	GSTOP	43200	2655	21	14.5043	350	4183.25	2.8	0.35	0.35	3412
1104613	60	32	21	0.106412	1.040000	Intel-32t-2s	GSTOP_REFINEMENT	43200	2593	21	14.5924	350	4131.65	2.8	0.35	0.35	3419
1104613	60	32	21	0.152220	1.100000	Intel-32t-2s	GUPDATE_REFINEMENT	43200	1780	16	9.10337	350	6127.3	2.8	0.35	0.35	5337
1104613	60	32	21	0.145143	1.110000	Intel-32t-2s	G	43200	2058	17	9.01361	350	6403.8	2.8	0.35	0.35	5274
1104613	60	32	22	0.164449	1.120000	Intel-32t-2s	G	43200	1964	15	7.86558	350	7223.6	2.8	0.35	0.35	6042
1104613	60	32	2	0.108083	2.050000	Intel-32t-2s	GSTOP_REFINEMENT	43200	19397	97	66.8183	350	13611.8	2.8	0.35	0.35	1514
1104613	60	32	22	0.166872	1.120000	Intel-32t-2s	GUPDATE	43200	1964	14	7.76018	350	7258.95	2.8	0.35	0.35	6042
1104613	60	32	22	0.093151	1.200000	Intel-32t-2s	GSTOP	43200	3194	28	20.5369	350	3173.55	2.8	0.35	0.35	2374
1104613	60	32	22	0.167554	1.130000	Intel-32t-2s	GUPDATE	43200	1964	14	7.76018	350	7258.95	2.8	0.35	0.35	6042
1104613	60	32	22	0.090372	1.150000	Intel-32t-2s	GSTOP	43200	3194	28	20.5369	350	3173.55	2.8	0.35	0.35	2374
1104613	60	32	22	0.085405	1.150000	Intel-32t-2s	GSTOP_REFINEMENT	43200	3122	28	20.1874	350	3085.95	2.8	0.35	0.35	2414
1104613	60	32	22	0.173156	1.130000	Intel-32t-2s	GUPDATE_REFINEMENT	43200	1695	14	7.60767	350	6967.4	2.8	0.35	0.35	6042
1104613	60	32	22	0.166684	1.130000	Intel-32t-2s	G	43200	1964	15	7.86558	350	7223.6	2.8	0.35	0.35	6042
1104613	60	32	22	0.165035	1.110000	Intel-32t-2s	GUPDATE	43200	1964	14	7.76018	350	7258.95	2.8	0.35	0.35	6042
1104613	60	32	22	0.085845	1.120000	Intel-32t-2s	GSTOP	43200	3194	28	20.5369	350	3173.55	2.8	0.35	0.35	2374
1104613	60	32	22	0.084733	1.130000	Intel-32t-2s	GSTOP_REFINEMENT	43200	3122	28	20.1874	350	3085.95	2.8	0.35	0.35	2414
1104613	60	32	22	0.169367	1.100000	Intel-32t-2s	GUPDATE_REFINEMENT	43200	1695	14	7.60767	350	6967.4	2.8	0.35	0.35	6042
1104613	60	32	22	0.163800	1.120000	Intel-32t-2s	G	43200	1964	15	7.86558	350	7223.6	2.8	0.35	0.35	6042
1104613	60	32	23	0.172044	1.120000	Intel-32t-2s	G	43200	1879	16	7.41245	350	7823.8	2.8	0.35	0.35	6561
1104613	60	32	2	0.107874	2.060000	Intel-32t-2s	GUPDATE_REFINEMENT	43200	19274	87	63.0406	350	13523.5	2.8	0.35	0.35	1492
1104613	60	32	23	0.167652	1.120000	Intel-32t-2s	GUPDATE	43200	1879	15	7.97073	350	7220.85	2.8	0.35	0.35	6055
1104613	60	32	23	0.089451	1.080000	Intel-32t-2s	GSTOP	43200	2547	28	18.6341	350	3429	2.8	0.35	0.35	2768
1104613	60	32	23	0.166697	1.120000	Intel-32t-2s	GUPDATE	43200	1879	15	7.97073	350	7220.85	2.8	0.35	0.35	6055
1104613	60	32	23	0.088745	1.100000	Intel-32t-2s	GSTOP	43200	2547	28	18.6341	350	3429	2.8	0.35	0.35	2768
1104613	60	32	23	0.092126	1.120000	Intel-32t-2s	GSTOP_REFINEMENT	43200	2480	28	18.3956	350	3341.85	2.8	0.35	0.35	2773
1104613	60	32	23	0.172213	1.130000	Intel-32t-2s	GUPDATE_REFINEMENT	43200	1618	16	8.13535	350	6912.15	2.8	0.35	0.35	6078
1104613	60	32	23	0.175584	1.130000	Intel-32t-2s	G	43200	1879	16	7.41245	350	7823.8	2.8	0.35	0.35	6561
1104613	60	32	23	0.163939	1.100000	Intel-32t-2s	GUPDATE	43200	1879	15	7.97073	350	7220.85	2.8	0.35	0.35	6055
1104613	60	32	23	0.086860	1.090000	Intel-32t-2s	GSTOP	43200	2547	28	18.6341	350	3429	2.8	0.35	0.35	2768
1104613	60	32	23	0.090401	1.080000	Intel-32t-2s	GSTOP_REFINEMENT	43200	2480	28	18.3956	350	3341.85	2.8	0.35	0.35	2773
1104613	60	32	23	0.171365	1.110000	Intel-32t-2s	GUPDATE_REFINEMENT	43200	1618	16	8.13535	350	6912.15	2.8	0.35	0.35	6078
1104613	60	32	23	0.173863	1.130000	Intel-32t-2s	G	43200	1879	16	7.41245	350	7823.8	2.8	0.35	0.35	6561
1104613	60	32	24	0.132040	1.090000	Intel-32t-2s	G	43200	1800	24	10.8117	350	5694.75	2.8	0.35	0.35	4776
1104613	60	32	2	0.331578	6.950000	Intel-32t-2s	G	43200	21600	105	75.0092	350	15162.4	2.8	0.35	0.35	1394
1104613	60	32	24	0.125606	1.130000	Intel-32t-2s	GUPDATE	43200	1800	30	13.3878	350	5158.45	2.8	0.35	0.35	4344
1104613	60	32	24	0.078535	1.100000	Intel-32t-2s	GSTOP	43200	1890	27	17.4376	350	2619.5	2.8	0.35	0.35	2116
1104613	60	32	24	0.122664	1.090000	Intel-32t-2s	GUPDATE	43200	1800	30	13.3878	350	5158.45	2.8	0.35	0.35	4344
1104613	60	32	24	0.081607	1.100000	Intel-32t-2s	GSTOP	43200	1890	27	17.4376	350	2619.5	2.8	0.35	0.35	2116
1104613	60	32	24	0.079457	1.090000	Intel-32t-2s	GSTOP_REFINEMENT	43200	1865	27	19.1534	350	2582.65	2.8	0.35	0.35	2192
1104613	60	32	24	0.127349	1.080000	Intel-32t-2s	GUPDATE_REFINEMENT	43200	1635	30	13.5058	350	4971.55	2.8	0.35	0.35	4392
1104613	60	32	24	0.130356	1.080000	Intel-32t-2s	G	43200	1800	24	10.8117	350	5694.75	2.8	0.35	0.35	4776
1104613	60	32	24	0.121558	1.080000	Intel-32t-2s	GUPDATE	43200	1800	30	13.3878	350	5158.45	2.8	0.35	0.35	4344
1104613	60	32	24	0.080733	1.100000	Intel-32t-2s	GSTOP	43200	1890	27	17.4376	350	2619.5	2.8	0.35	0.35	2116
1104613	60	32	24	0.082870	1.090000	Intel-32t-2s	GSTOP_REFINEMENT	43200	1865	27	19.1534	350	2582.65	2.8	0.35	0.35	2192
1104613	60	32	24	0.125752	1.090000	Intel-32t-2s	GUPDATE_REFINEMENT	43200	1635	30	13.5058	350	4971.55	2.8	0.35	0.35	4392
1104613	60	32	24	0.130520	1.080000	Intel-32t-2s	G	43200	1800	24	10.8117	350	5694.75	2.8	0.35	0.35	4776
1104613	60	32	25	0.070346	1.120000	Intel-32t-2s	G	43200	1728	36	27.4444	350	2179.7	2.8	0.35	0.35	1825
1104613	60	32	2	0.266562	5.580000	Intel-32t-2s	GUPDATE	43200	21600	105	75.0092	350	15162.4	2.8	0.35	0.35	1394
1104613	60	32	25	0.071789	1.090000	Intel-32t-2s	GUPDATE	43200	1728	36	27.4444	350	2180.4	2.8	0.35	0.35	1825
1104613	60	32	25	0.076476	1.100000	Intel-32t-2s	GSTOP	43200	1728	36	27.4444	350	2179.7	2.8	0.35	0.35	1825
1104613	60	32	25	0.074886	1.110000	Intel-32t-2s	GUPDATE	43200	1728	36	27.4444	350	2180.4	2.8	0.35	0.35	1825
1104613	60	32	25	0.075959	1.110000	Intel-32t-2s	GSTOP	43200	1728	36	27.4444	350	2179.7	2.8	0.35	0.35	1825
1104613	60	32	25	0.073179	1.080000	Intel-32t-2s	GSTOP_REFINEMENT	43200	1723	35	26.9391	350	2154.5	2.8	0.35	0.35	1875
1104613	60	32	25	0.077584	1.120000	Intel-32t-2s	GUPDATE_REFINEMENT	43200	1720	35	26.7116	350	2172.7	2.8	0.35	0.35	1875
1104613	60	32	25	0.071762	1.100000	Intel-32t-2s	G	43200	1728	36	27.4444	350	2179.7	2.8	0.35	0.35	1825
1104613	60	32	25	0.069814	1.120000	Intel-32t-2s	GUPDATE	43200	1728	36	27.4444	350	2180.4	2.8	0.35	0.35	1825
1104613	60	32	25	0.074180	1.110000	Intel-32t-2s	GSTOP	43200	1728	36	27.4444	350	2179.7	2.8	0.35	0.35	1825
1104613	60	32	25	0.081064	1.110000	Intel-32t-2s	GSTOP_REFINEMENT	43200	1723	35	26.9391	350	2154.5	2.8	0.35	0.35	1875
1104613	60	32	25	0.072909	1.090000	Intel-32t-2s	GUPDATE_REFINEMENT	43200	1720	35	26.7116	350	2172.7	2.8	0.35	0.35	1875
1104613	60	32	25	0.076171	1.110000	Intel-32t-2s	G	43200	1728	36	27.4444	350	2179.7	2.8	0.35	0.35	1825
1104613	60	32	26	0.172911	1.110000	Intel-32t-2s	G	43200	1662	14	7.38688	350	7589.1	2.8	0.35	0.35	6488
1104613	60	32	2	0.152002	3.140000	Intel-32t-2s	GSTOP	43200	21600	105	75.0092	350	15162.4	2.8	0.35	0.35	1394
1104613	60	32	26	0.178161	1.130000	Intel-32t-2s	GUPDATE	43200	1662	14	7.20578	350	7802.6	2.8	0.35	0.35	6670
1104613	60	32	26	0.106394	1.080000	Intel-32t-2s	GSTOP	43200	2440	21	15.3705	350	4337.95	2.8	0.35	0.35	3641
1104613	60	32	26	0.174535	1.120000	Intel-32t-2s	GUPDATE	43200	1662	14	7.20578	350	7802.6	2.8	0.35	0.35	6670
1104613	60	32	26	0.107334	1.090000	Intel-32t-2s	GSTOP	43200	2440	21	15.3705	350	4337.95	2.8	0.35	0.35	3641
1104613	60	32	26	0.107274	1.080000	Intel-32t-2s	GSTOP_REFINEMENT	43200	2371	22	15.3454	350	4262.9	2.8	0.35	0.35	3645
1104613	60	32	26	0.179382	1.110000	Intel-32t-2s	GUPDATE_REFINEMENT	43200	1441	14	7.37127	350	7474.3	2.8	0.35	0.35	6670
1104613	60	32	26	0.173928	1.120000	Intel-32t-2s	G	43200	1662	14	7.38688	350	7589.1	2.8	0.35	0.35	6488
1104613	60	32	26	0.174848	1.110000	Intel-32t-2s	GUPDATE	43200	1662	14	7.20578	350	7802.6	2.8	0.35	0.35	6670
1104613	60	32	26	0.107163	1.070000	Intel-32t-2s	GSTOP	43200	2440	21	15.3705	350	4337.95	2.8	0.35	0.35	3641
1104613	60	32	26	0.110226	1.130000	Intel-32t-2s	GSTOP_REFINEMENT	43200	2371	22	15.3454	350	4262.9	2.8	0.35	0.35	3645
1104613	60	32	26	0.180293	1.110000	Intel-32t-2s	GUPDATE_REFINEMENT	43200	1441	14	7.37127	350	7474.3	2.8	0.35	0.35	6670
1104613	60	32	26	0.176413	1.110000	Intel-32t-2s	G	43200	1662	14	7.38688	350	7589.1	2.8	0.35	0.35	6488
1104613	60	32	27	0.186279	1.110000	Intel-32t-2s	G	43200	1600	14	6.60813	350	8572.9	2.8	0.35	0.35	7371
1104613	60	32	2	0.108183	2.040000	Intel-32t-2s	GSTOP_REFINEMENT	43200	19397	97	66.8183	350	13611.8	2.8	0.35	0.35	1514
1104613	60	32	27	0.174618	1.110000	Intel-32t-2s	GUPDATE	43200	1600	13	7.27937	350	7851.45	2.8	0.35	0.35	6750
1104613	60	32	27	0.095870	1.070000	Intel-32t-2s	GSTOP	43200	2495	25	17.788	350	3704.35	2.8	0.35	0.35	3078
1104613	60	32	27	0.173016	1.100000	Intel-32t-2s	GUPDATE	43200	1600	13	7.27937	350	7851.45	2.8	0.35	0.35	6750
1104613	60	32	27	0.107115	1.120000	Intel-32t-2s	GSTOP	43200	2495	25	17.788	350	3704.35	2.8	0.35	0.35	3078
1104613	60	32	27	0.095111	1.060000	Intel-32t-2s	GSTOP_REFINEMENT	43200	2430	25	17.5527	350	3644.35	2.8	0.35	0.35	3082
1104613	60	32	27	0.183787	1.100000	Intel-32t-2s	GUPDATE_REFINEMENT	43200	1361	14	7.16165	350	7548.35	2.8	0.35	0.35	6750
1104613	60	32	27	0.187197	1.110000	Intel-32t-2s	G	43200	1600	14	6.60813	350	8572.9	2.8	0.35	0.35	7371
1104613	60	32	27	0.175362	1.110000	Intel-32t-2s	GUPDATE	43200	1600	13	7.27937	350	7851.45	2.8	0.35	0.35	6750
1104613	60	32	27	0.095198	1.080000	Intel-32t-2s	GSTOP	43200	2495	25	17.788	350	3704.35	2.8	0.35	0.35	3078
1104613	60	32	27	0.093529	1.060000	Intel-32t-2s	GSTOP_REFINEMENT	43200	2430	25	17.5527	350	3644.35	2.8	0.35	0.35	3082
1104613	60	32	27	0.185236	1.110000	Intel-32t-2s	GUPDATE_REFINEMENT	43200	1361	14	7.16165	350	7548.35	2.8	0.35	0.35	6750
1104613	60	32	27	0.188275	1.120000	Intel-32t-2s	G	43200	1600	14	6.60813	350	8572.9	2.8	0.35	0.35	7371
1104613	60	32	28	0.179882	1.110000	Intel-32t-2s	G	43200	1543	14	7.00518	350	8042.5	2.8	0.35	0.35	6940
1104613	60	32	2	0.187567	3.860000	Intel-32t-2s	GUPDATE_REFINEMENT	43200	19274	87	63.0406	350	13523.5	2.8	0.35	0.35	1492
1104613	60	32	28	0.174391	1.100000	Intel-32t-2s	GUPDATE	43200	1543	13	7.19183	350	7767.75	2.8	0.35	0.35	6716
1104613	60	32	28	0.097346	1.070000	Intel-32t-2s	GSTOP	43200	2071	25	16.7581	350	3752	2.8	0.35	0.35	3175
1104613	60	32	28	0.176952	1.110000	Intel-32t-2s	GUPDATE	43200	1543	13	7.19183	350	7767.75	2.8	0.35	0.35	6716
1104613	60	32	28	0.105451	1.100000	Intel-32t-2s	GSTOP	43200	2071	25	16.7581	350	3752	2.8	0.35	0.35	3175
1104613	60	32	28	0.095645	1.060000	Intel-32t-2s	GSTOP_REFINEMENT	43200	2022	24	16.5213	350	3709	2.8	0.35	0.35	3196
1104613	60	32	28	0.183626	1.110000	Intel-32t-2s	GUPDATE_REFINEMENT	43200	1303	12	7.08596	350	7467.8	2.8	0.35	0.35	6716
1104613	60	32	28	0.181503	1.120000	Intel-32t-2s	G	43200	1543	14	7.00518	350	8042.5	2.8	0.35	0.35	6940
1104613	60	32	28	0.175548	1.100000	Intel-32t-2s	GUPDATE	43200	1543	13	7.19183	350	7767.75	2.8	0.35	0.35	6716
1104613	60	32	28	0.104199	1.100000	Intel-32t-2s	GSTOP	43200	2071	25	16.7581	350	3752	2.8	0.35	0.35	3175
1104613	60	32	28	0.099761	1.070000	Intel-32t-2s	GSTOP_REFINEMENT	43200	2022	24	16.5213	350	3709	2.8	0.35	0.35	3196
1104613	60	32	28	0.182989	1.100000	Intel-32t-2s	GUPDATE_REFINEMENT	43200	1303	12	7.08596	350	7467.8	2.8	0.35	0.35	6716
1104613	60	32	28	0.181540	1.130000	Intel-32t-2s	G	43200	1543	14	7.00518	350	8042.5	2.8	0.35	0.35	6940
1104613	60	32	29	0.191636	1.120000	Intel-32t-2s	G	43200	1490	14	6.65101	350	8533.35	2.8	0.35	0.35	7385
1104613	60	32	2	0.108883	2.130000	Intel-32t-2s	G	43200	21600	105	75.0092	350	15162.4	2.8	0.35	0.35	1394
1104613	60	32	29	0.173331	1.100000	Intel-32t-2s	GUPDATE	43200	1490	14	7.28054	350	7711.75	2.8	0.35	0.35	6660
1104613	60	32	29	0.105415	1.090000	Intel-32t-2s	GSTOP	43200	2120	21	15.4009	350	3432.45	2.8	0.35	0.35	2872
1104613	60	32	29	0.173554	1.110000	Intel-32t-2s	GUPDATE	43200	1490	14	7.28054	350	7711.75	2.8	0.35	0.35	6660
1104613	60	32	29	0.106616	1.110000	Intel-32t-2s	GSTOP	43200	2120	21	15.4009	350	3432.45	2.8	0.35	0.35	2872
1104613	60	32	29	0.092926	1.060000	Intel-32t-2s	GSTOP_REFINEMENT	43200	2072	21	15.3137	350	3395.1	2.8	0.35	0.35	2881
1104613	60	32	29	0.182390	1.110000	Intel-32t-2s	GUPDATE_REFINEMENT	43200	1267	13	7.15075	350	7398.5	2.8	0.35	0.35	6660
1104613	60	32	29	0.193377	1.130000	Intel-32t-2s	G	43200	1490	14	6.65101	350	8533.35	2.8	0.35	0.35	7385
1104613	60	32	29	0.173469	1.100000	Intel-32t-2s	GUPDATE	43200	1490	14	7.28054	350	7711.75	2.8	0.35	0.35	6660
1104613	60	32	29	0.101821	1.100000	Intel-32t-2s	GSTOP	43200	2120	21	15.4009	350	3432.45	2.8	0.35	0.35	2872
1104613	60	32	29	0.095132	1.050000	Intel-32t-2s	GSTOP_REFINEMENT	43200	2072	21	15.3137	350	3395.1	2.8	0.35	0.35	2881
1104613	60	32	29	0.185402	1.120000	Intel-32t-2s	GUPDATE_REFINEMENT	43200	1267	13	7.15075	350	7398.5	2.8	0.35	0.35	6660
1104613	60	32	29	0.193296	1.120000	Intel-32t-2s	G	43200	1490	14	6.65101	350	8533.35	2.8	0.35	0.35	7385
1104613	60	32	3	0.120807	1.570000	Intel-32t-2s	G	43200	14400	40	22.1472	350	10328.8	2.8	0.35	0.35	2283
1104613	60	32	30	0.075668	1.080000	Intel-32t-2s	G	43200	1440	31	23.1604	350	2364.35	2.8	0.35	0.35	2070
1104613	60	32	3	0.111775	1.860000	Intel-32t-2s	GUPDATE	43200	14400	43	25.7549	350	10256.3	2.8	0.35	0.35	1914
1104613	60	32	30	0.074679	1.070000	Intel-32t-2s	GUPDATE	43200	1440	31	23.1604	350	2364.35	2.8	0.35	0.35	2070
1104613	60	32	30	0.076271	1.070000	Intel-32t-2s	GSTOP	43200	1440	31	23.1604	350	2364.35	2.8	0.35	0.35	2070
1104613	60	32	30	0.078753	1.110000	Intel-32t-2s	GUPDATE	43200	1440	31	23.1604	350	2364.35	2.8	0.35	0.35	2070
1104613	60	32	30	0.072934	1.070000	Intel-32t-2s	GSTOP	43200	1440	31	23.1604	350	2364.35	2.8	0.35	0.35	2070
1104613	60	32	30	0.076766	1.080000	Intel-32t-2s	GSTOP_REFINEMENT	43200	1434	31	23.3061	350	2349.65	2.8	0.35	0.35	2070
1104613	60	32	30	0.078107	1.080000	Intel-32t-2s	GUPDATE_REFINEMENT	43200	1434	31	23.3061	350	2349.65	2.8	0.35	0.35	2070
1104613	60	32	30	0.075536	1.080000	Intel-32t-2s	G	43200	1440	31	23.1604	350	2364.35	2.8	0.35	0.35	2070
1104613	60	32	30	0.075248	1.060000	Intel-32t-2s	GUPDATE	43200	1440	31	23.1604	350	2364.35	2.8	0.35	0.35	2070
1104613	60	32	30	0.076437	1.070000	Intel-32t-2s	GSTOP	43200	1440	31	23.1604	350	2364.35	2.8	0.35	0.35	2070
1104613	60	32	30	0.082194	1.090000	Intel-32t-2s	GSTOP_REFINEMENT	43200	1434	31	23.3061	350	2349.65	2.8	0.35	0.35	2070
1104613	60	32	30	0.077169	1.080000	Intel-32t-2s	GUPDATE_REFINEMENT	43200	1434	31	23.3061	350	2349.65	2.8	0.35	0.35	2070
1104613	60	32	30	0.075248	1.070000	Intel-32t-2s	G	43200	1440	31	23.1604	350	2364.35	2.8	0.35	0.35	2070
1104613	60	32	31	0.190453	1.110000	Intel-32t-2s	G	43200	1394	13	6.56528	350	8570.55	2.8	0.35	0.35	7488
1104613	60	32	3	0.095721	1.590000	Intel-32t-2s	GSTOP	43200	15843	50	34.9557	350	11156.2	2.8	0.35	0.35	1563
1104613	60	32	3	0.154446	2.650000	Intel-32t-2s	GUPDATE	43200	14400	43	25.7549	350	10256.3	2.8	0.35	0.35	1914
1104613	60	32	31	0.173334	1.100000	Intel-32t-2s	GUPDATE	43200	1394	15	7.35653	350	7529.45	2.8	0.35	0.35	6589
1104613	60	32	3	0.167029	2.880000	Intel-32t-2s	GSTOP	43200	15843	50	34.9557	350	11156.2	2.8	0.35	0.35	1563
1104613	60	32	31	0.124630	1.030000	Intel-32t-2s	GSTOP	43200	1911	18	11.9273	350	5017.1	2.8	0.35	0.35	4328
1104613	60	32	31	0.171783	1.090000	Intel-32t-2s	GUPDATE	43200	1394	15	7.35653	350	7529.45	2.8	0.35	0.35	6589
1104613	60	32	31	0.123973	1.050000	Intel-32t-2s	GSTOP	43200	1911	18	11.9273	350	5017.1	2.8	0.35	0.35	4328
1104613	60	32	31	0.122138	1.040000	Intel-32t-2s	GSTOP_REFINEMENT	43200	1771	18	11.9983	350	4879.25	2.8	0.35	0.35	4330
1104613	60	32	31	0.178732	1.110000	Intel-32t-2s	GUPDATE_REFINEMENT	43200	1184	14	7.20524	350	7252.6	2.8	0.35	0.35	6589
1104613	60	32	31	0.190796	1.110000	Intel-32t-2s	G	43200	1394	13	6.56528	350	8570.55	2.8	0.35	0.35	7488
1104613	60	32	31	0.172582	1.100000	Intel-32t-2s	GUPDATE	43200	1394	15	7.35653	350	7529.45	2.8	0.35	0.35	6589
1104613	60	32	31	0.118964	1.030000	Intel-32t-2s	GSTOP	43200	1911	18	11.9273	350	5017.1	2.8	0.35	0.35	4328
1104613	60	32	31	0.127831	1.040000	Intel-32t-2s	GSTOP_REFINEMENT	43200	1771	18	11.9983	350	4879.25	2.8	0.35	0.35	4330
1104613	60	32	31	0.181360	1.110000	Intel-32t-2s	GUPDATE_REFINEMENT	43200	1184	14	7.20524	350	7252.6	2.8	0.35	0.35	6589
1104613	60	32	31	0.190191	1.110000	Intel-32t-2s	G	43200	1394	13	6.56528	350	8570.55	2.8	0.35	0.35	7488
1104613	60	32	32	0.201712	1.130000	Intel-32t-2s	G	43200	1350	13	6.17111	350	8941.95	2.8	0.35	0.35	7872
1104613	60	32	3	0.104784	1.620000	Intel-32t-2s	GSTOP_REFINEMENT	43200	11390	40	23.968	350	8052.3	2.8	0.35	0.35	2209
1104613	60	32	32	0.192469	1.120000	Intel-32t-2s	GUPDATE	43200	1350	12	6.34222	350	8466.8	2.8	0.35	0.35	7456
1104613	60	32	32	0.099674	1.090000	Intel-32t-2s	GSTOP	43200	2099	21	15.6436	350	3739.6	2.8	0.35	0.35	3182
1104613	60	32	32	0.196555	1.140000	Intel-32t-2s	GUPDATE	43200	1350	12	6.34222	350	8466.8	2.8	0.35	0.35	7456
1104613	60	32	32	0.098382	1.080000	Intel-32t-2s	GSTOP	43200	2099	21	15.6436	350	3739.6	2.8	0.35	0.35	3182
1104613	60	32	32	0.100834	1.070000	Intel-32t-2s	GSTOP_REFINEMENT	43200	2050	21	15.3795	350	3693	2.8	0.35	0.35	3186
1104613	60	32	32	0.199855	1.130000	Intel-32t-2s	GUPDATE_REFINEMENT	43200	1141	13	6.27257	350	8171.05	2.8	0.35	0.35	7456
1104613	60	32	32	0.202881	1.130000	Intel-32t-2s	G	43200	1350	13	6.17111	350	8941.95	2.8	0.35	0.35	7872
1104613	60	32	32	0.191655	1.120000	Intel-32t-2s	GUPDATE	43200	1350	12	6.34222	350	8466.8	2.8	0.35	0.35	7456
1104613	60	32	32	0.104063	1.120000	Intel-32t-2s	GSTOP	43200	2099	21	15.6436	350	3739.6	2.8	0.35	0.35	3182
1104613	60	32	32	0.097691	1.070000	Intel-32t-2s	GSTOP_REFINEMENT	43200	2050	21	15.3795	350	3693	2.8	0.35	0.35	3186
1104613	60	32	32	0.202817	1.130000	Intel-32t-2s	GUPDATE_REFINEMENT	43200	1141	13	6.27257	350	8171.05	2.8	0.35	0.35	7456
1104613	60	32	32	0.201725	1.130000	Intel-32t-2s	G	43200	1350	13	6.17111	350	8941.95	2.8	0.35	0.35	7872
1104613	60	32	33	0.212277	1.180000	Intel-32t-2s	G	43200	1310	13	6.3542	350	8805.9	2.8	0.35	0.35	7758
1104613	60	32	3	0.123490	1.310000	Intel-32t-2s	GUPDATE_REFINEMENT	43200	8181	19	13.717	350	6175.15	2.8	0.35	0.35	3465
1104613	60	32	33	0.195039	1.120000	Intel-32t-2s	GUPDATE	43200	1310	13	6.30305	350	8495.35	2.8	0.35	0.35	7494
1104613	60	32	33	0.093604	1.080000	Intel-32t-2s	GSTOP	43200	1789	25	16.4796	350	3436.6	2.8	0.35	0.35	2966
1104613	60	32	33	0.194193	1.120000	Intel-32t-2s	GUPDATE	43200	1310	13	6.30305	350	8495.35	2.8	0.35	0.35	7494
1104613	60	32	33	0.092206	1.070000	Intel-32t-2s	GSTOP	43200	1789	25	16.4796	350	3436.6	2.8	0.35	0.35	2966
1104613	60	32	33	0.095589	1.090000	Intel-32t-2s	GSTOP_REFINEMENT	43200	1724	26	16.123	350	3388.1	2.8	0.35	0.35	2966
1104613	60	32	33	0.203955	1.110000	Intel-32t-2s	GUPDATE_REFINEMENT	43200	1102	12	6.29038	350	8230.4	2.8	0.35	0.35	7494
1104613	60	32	33	0.210685	1.160000	Intel-32t-2s	G	43200	1310	13	6.3542	350	8805.9	2.8	0.35	0.35	7758
1104613	60	32	33	0.193725	1.120000	Intel-32t-2s	GUPDATE	43200	1310	13	6.30305	350	8495.35	2.8	0.35	0.35	7494
1104613	60	32	33	0.092285	1.080000	Intel-32t-2s	GSTOP	43200	1789	25	16.4796	350	3436.6	2.8	0.35	0.35	2966
1104613	60	32	33	0.092863	1.080000	Intel-32t-2s	GSTOP_REFINEMENT	43200	1724	26	16.123	350	3388.1	2.8	0.35	0.35	2966
1104613	60	32	33	0.200079	1.130000	Intel-32t-2s	GUPDATE_REFINEMENT	43200	1102	12	6.29038	350	8230.4	2.8	0.35	0.35	7494
1104613	60	32	33	0.209768	1.170000	Intel-32t-2s	G	43200	1310	13	6.3542	350	8805.9	2.8	0.35	0.35	7758
1104613	60	32	34	0.209619	1.120000	Intel-32t-2s	G	43200	1271	13	6.02282	350	9218.05	2.8	0.35	0.35	8146
1104613	60	32	3	0.109096	1.560000	Intel-32t-2s	G	43200	14400	40	22.1472	350	10328.8	2.8	0.35	0.35	2283
1104613	60	32	34	0.194428	1.110000	Intel-32t-2s	GUPDATE	43200	1271	12	6.28403	350	8692.4	2.8	0.35	0.35	7704
1104613	60	32	34	0.098172	1.080000	Intel-32t-2s	GSTOP	43200	1717	25	16.0652	350	3680.2	2.8	0.35	0.35	3193
1104613	60	32	34	0.194852	1.130000	Intel-32t-2s	GUPDATE	43200	1271	12	6.28403	350	8692.4	2.8	0.35	0.35	7704
1104613	60	32	34	0.111493	1.110000	Intel-32t-2s	GSTOP	43200	1717	25	16.0652	350	3680.2	2.8	0.35	0.35	3193
1104613	60	32	34	0.102259	1.090000	Intel-32t-2s	GSTOP_REFINEMENT	43200	1679	23	16.0083	350	3635.05	2.8	0.35	0.35	3208
1104613	60	32	34	0.205355	1.130000	Intel-32t-2s	GUPDATE_REFINEMENT	43200	1056	13	6.24716	350	8388.25	2.8	0.35	0.35	7704
1104613	60	32	34	0.209974	1.130000	Intel-32t-2s	G	43200	1271	13	6.02282	350	9218.05	2.8	0.35	0.35	8146
1104613	60	32	34	0.194164	1.120000	Intel-32t-2s	GUPDATE	43200	1271	12	6.28403	350	8692.4	2.8	0.35	0.35	7704
1104613	60	32	34	0.106135	1.110000	Intel-32t-2s	GSTOP	43200	1717	25	16.0652	350	3680.2	2.8	0.35	0.35	3193
1104613	60	32	34	0.098890	1.070000	Intel-32t-2s	GSTOP_REFINEMENT	43200	1679	23	16.0083	350	3635.05	2.8	0.35	0.35	3208
1104613	60	32	34	0.209187	1.140000	Intel-32t-2s	GUPDATE_REFINEMENT	43200	1056	13	6.24716	350	8388.25	2.8	0.35	0.35	7704
1104613	60	32	34	0.210138	1.140000	Intel-32t-2s	G	43200	1271	13	6.02282	350	9218.05	2.8	0.35	0.35	8146
1104613	60	32	35	0.179450	1.100000	Intel-32t-2s	G	43200	1235	17	7.4502	350	7799.6	2.8	0.35	0.35	6905
1104613	60	32	3	0.189021	2.980000	Intel-32t-2s	GUPDATE	43200	14400	43	25.7549	350	10256.3	2.8	0.35	0.35	1914
1104613	60	32	35	0.170703	1.090000	Intel-32t-2s	GUPDATE	43200	1235	17	7.70607	350	7365.6	2.8	0.35	0.35	6520
1104613	60	32	35	0.089656	1.080000	Intel-32t-2s	GSTOP	43200	1296	24	15.0478	350	2996.25	2.8	0.35	0.35	2605
1104613	60	32	35	0.168254	1.090000	Intel-32t-2s	GUPDATE	43200	1235	17	7.70607	350	7365.6	2.8	0.35	0.35	6520
1104613	60	32	35	0.088297	1.080000	Intel-32t-2s	GSTOP	43200	1296	24	15.0478	350	2996.25	2.8	0.35	0.35	2605
1104613	60	32	35	0.092019	1.070000	Intel-32t-2s	GSTOP_REFINEMENT	43200	1273	22	15.5192	350	2962.25	2.8	0.35	0.35	2660
1104613	60	32	35	0.181761	1.110000	Intel-32t-2s	GUPDATE_REFINEMENT	43200	1048	17	7.53435	350	7124.45	2.8	0.35	0.35	6520
1104613	60	32	35	0.180485	1.110000	Intel-32t-2s	G	43200	1235	17	7.4502	350	7799.6	2.8	0.35	0.35	6905
1104613	60	32	35	0.169519	1.090000	Intel-32t-2s	GUPDATE	43200	1235	17	7.70607	350	7365.6	2.8	0.35	0.35	6520
1104613	60	32	35	0.087299	1.060000	Intel-32t-2s	GSTOP	43200	1296	24	15.0478	350	2996.25	2.8	0.35	0.35	2605
1104613	60	32	35	0.087611	1.060000	Intel-32t-2s	GSTOP_REFINEMENT	43200	1273	22	15.5192	350	2962.25	2.8	0.35	0.35	2660
1104613	60	32	35	0.178680	1.110000	Intel-32t-2s	GUPDATE_REFINEMENT	43200	1048	17	7.53435	350	7124.45	2.8	0.35	0.35	6520
1104613	60	32	35	0.179874	1.100000	Intel-32t-2s	G	43200	1235	17	7.4502	350	7799.6	2.8	0.35	0.35	6905
1104613	60	32	36	0.081518	1.080000	Intel-32t-2s	G	43200	1200	30	22.7833	350	2389.3	2.8	0.35	0.35	2124
1104613	60	32	3	0.106064	1.880000	Intel-32t-2s	GSTOP	43200	15843	50	34.9557	350	11156.2	2.8	0.35	0.35	1563
1104613	60	32	36	0.080260	1.080000	Intel-32t-2s	GUPDATE	43200	1200	30	22.7833	350	2390	2.8	0.35	0.35	2124
1104613	60	32	36	0.079897	1.090000	Intel-32t-2s	GSTOP	43200	1200	30	22.7833	350	2389.3	2.8	0.35	0.35	2124
1104613	60	32	36	0.081497	1.070000	Intel-32t-2s	GUPDATE	43200	1200	30	22.7833	350	2390	2.8	0.35	0.35	2124
1104613	60	32	36	0.080153	1.090000	Intel-32t-2s	GSTOP	43200	1200	30	22.7833	350	2389.3	2.8	0.35	0.35	2124
1104613	60	32	36	0.083730	1.070000	Intel-32t-2s	GSTOP_REFINEMENT	43200	1200	30	22.7833	350	2389.3	2.8	0.35	0.35	2124
1104613	60	32	36	0.085606	1.110000	Intel-32t-2s	GUPDATE_REFINEMENT	43200	1200	30	22.7833	350	2390	2.8	0.35	0.35	2124
1104613	60	32	36	0.083051	1.090000	Intel-32t-2s	G	43200	1200	30	22.7833	350	2389.3	2.8	0.35	0.35	2124
1104613	60	32	36	0.082042	1.080000	Intel-32t-2s	GUPDATE	43200	1200	30	22.7833	350	2390	2.8	0.35	0.35	2124
1104613	60	32	36	0.075770	1.090000	Intel-32t-2s	GSTOP	43200	1200	30	22.7833	350	2389.3	2.8	0.35	0.35	2124
1104613	60	32	36	0.077865	1.080000	Intel-32t-2s	GSTOP_REFINEMENT	43200	1200	30	22.7833	350	2389.3	2.8	0.35	0.35	2124
1104613	60	32	36	0.076910	1.060000	Intel-32t-2s	GUPDATE_REFINEMENT	43200	1200	30	22.7833	350	2390	2.8	0.35	0.35	2124
1104613	60	32	36	0.079391	1.090000	Intel-32t-2s	G	43200	1200	30	22.7833	350	2389.3	2.8	0.35	0.35	2124
1104613	60	32	37	0.205891	1.110000	Intel-32t-2s	G	43200	1168	11	5.94777	350	9119.3	2.8	0.35	0.35	8161
1104613	60	32	3	0.121784	1.950000	Intel-32t-2s	GSTOP_REFINEMENT	43200	11390	40	23.968	350	8052.3	2.8	0.35	0.35	2209
1104613	60	32	37	0.194791	1.120000	Intel-32t-2s	GUPDATE	43200	1168	12	6.27397	350	8517.4	2.8	0.35	0.35	7606
1104613	60	32	37	0.135593	1.090000	Intel-32t-2s	GSTOP	43200	1765	19	12.6113	350	4990.2	2.8	0.35	0.35	4412
1104613	60	32	37	0.190514	1.110000	Intel-32t-2s	GUPDATE	43200	1168	12	6.27397	350	8517.4	2.8	0.35	0.35	7606
1104613	60	32	37	0.134225	1.120000	Intel-32t-2s	GSTOP	43200	1765	19	12.6113	350	4990.2	2.8	0.35	0.35	4412
1104613	60	32	37	0.129065	1.110000	Intel-32t-2s	GSTOP_REFINEMENT	43200	1703	19	12.3464	350	4942.15	2.8	0.35	0.35	4431
1104613	60	32	37	0.199263	1.100000	Intel-32t-2s	GUPDATE_REFINEMENT	43200	965	12	6.13782	350	8258.75	2.8	0.35	0.35	7606
1104613	60	32	37	0.205805	1.120000	Intel-32t-2s	G	43200	1168	11	5.94777	350	9119.3	2.8	0.35	0.35	8161
1104613	60	32	37	0.191168	1.100000	Intel-32t-2s	GUPDATE	43200	1168	12	6.27397	350	8517.4	2.8	0.35	0.35	7606
1104613	60	32	37	0.125275	1.060000	Intel-32t-2s	GSTOP	43200	1765	19	12.6113	350	4990.2	2.8	0.35	0.35	4412
1104613	60	32	37	0.129721	1.070000	Intel-32t-2s	GSTOP_REFINEMENT	43200	1703	19	12.3464	350	4942.15	2.8	0.35	0.35	4431
1104613	60	32	37	0.203445	1.110000	Intel-32t-2s	GUPDATE_REFINEMENT	43200	965	12	6.13782	350	8258.75	2.8	0.35	0.35	7606
1104613	60	32	37	0.208616	1.140000	Intel-32t-2s	G	43200	1168	11	5.94777	350	9119.3	2.8	0.35	0.35	8161
1104613	60	32	38	0.235617	1.130000	Intel-32t-2s	G	43200	1137	10	5.1029	350	10754	2.8	0.35	0.35	9684
1104613	60	32	3	0.115989	1.220000	Intel-32t-2s	GUPDATE_REFINEMENT	43200	8181	19	13.717	350	6175.15	2.8	0.35	0.35	3465
1104613	60	32	38	0.231698	1.140000	Intel-32t-2s	GUPDATE	43200	1137	11	5.39226	350	10196.4	2.8	0.35	0.35	9152
1104613	60	32	38	0.121057	1.090000	Intel-32t-2s	GSTOP	43200	1739	21	14.502	350	4164.2	2.8	0.35	0.35	3670
1104613	60	32	38	0.228323	1.130000	Intel-32t-2s	GUPDATE	43200	1137	11	5.39226	350	10196.4	2.8	0.35	0.35	9152
1104613	60	32	38	0.117844	1.090000	Intel-32t-2s	GSTOP	43200	1739	21	14.502	350	4164.2	2.8	0.35	0.35	3670
1104613	60	32	38	0.108427	1.060000	Intel-32t-2s	GSTOP_REFINEMENT	43200	1667	21	13.8956	350	4114.75	2.8	0.35	0.35	3674
1104613	60	32	38	0.239818	1.140000	Intel-32t-2s	GUPDATE_REFINEMENT	43200	929	10	5.33907	350	9874.4	2.8	0.35	0.35	9152
1104613	60	32	38	0.238526	1.140000	Intel-32t-2s	G	43200	1137	10	5.1029	350	10754	2.8	0.35	0.35	9684
1104613	60	32	38	0.240986	1.180000	Intel-32t-2s	GUPDATE	43200	1137	11	5.39226	350	10196.4	2.8	0.35	0.35	9152
1104613	60	32	38	0.118508	1.090000	Intel-32t-2s	GSTOP	43200	1739	21	14.502	350	4164.2	2.8	0.35	0.35	3670
1104613	60	32	38	0.108519	1.050000	Intel-32t-2s	GSTOP_REFINEMENT	43200	1667	21	13.8956	350	4114.75	2.8	0.35	0.35	3674
1104613	60	32	38	0.242204	1.150000	Intel-32t-2s	GUPDATE_REFINEMENT	43200	929	10	5.33907	350	9874.4	2.8	0.35	0.35	9152
1104613	60	32	38	0.253648	1.210000	Intel-32t-2s	G	43200	1137	10	5.1029	350	10754	2.8	0.35	0.35	9684
1104613	60	32	39	0.224016	1.120000	Intel-32t-2s	G	43200	1108	11	5.46751	350	9886.25	2.8	0.35	0.35	8880
1104613	60	32	3	0.200148	3.190000	Intel-32t-2s	G	43200	14400	40	22.1472	350	10328.8	2.8	0.35	0.35	2283
1104613	60	32	39	0.206280	1.130000	Intel-32t-2s	GUPDATE	43200	1108	12	5.963	350	9001.6	2.8	0.35	0.35	8100
1104613	60	32	39	0.099262	1.030000	Intel-32t-2s	GSTOP	43200	1390	18	14.636	350	3479.05	2.8	0.35	0.35	3066
1104613	60	32	39	0.207242	1.120000	Intel-32t-2s	GUPDATE	43200	1108	12	5.963	350	9001.6	2.8	0.35	0.35	8100
1104613	60	32	39	0.095968	1.040000	Intel-32t-2s	GSTOP	43200	1390	18	14.636	350	3479.05	2.8	0.35	0.35	3066
1104613	60	32	39	0.101731	1.040000	Intel-32t-2s	GSTOP_REFINEMENT	43200	1360	20	14.5316	350	3448.2	2.8	0.35	0.35	3084
1104613	60	32	39	0.213966	1.140000	Intel-32t-2s	GUPDATE_REFINEMENT	43200	914	12	5.61816	350	8772	2.8	0.35	0.35	8100
1104613	60	32	39	0.224133	1.130000	Intel-32t-2s	G	43200	1108	11	5.46751	350	9886.25	2.8	0.35	0.35	8880
1104613	60	32	39	0.206570	1.120000	Intel-32t-2s	GUPDATE	43200	1108	12	5.963	350	9001.6	2.8	0.35	0.35	8100
1104613	60	32	39	0.093391	1.030000	Intel-32t-2s	GSTOP	43200	1390	18	14.636	350	3479.05	2.8	0.35	0.35	3066
1104613	60	32	39	0.103559	1.060000	Intel-32t-2s	GSTOP_REFINEMENT	43200	1360	20	14.5316	350	3448.2	2.8	0.35	0.35	3084
1104613	60	32	39	0.214224	1.140000	Intel-32t-2s	GUPDATE_REFINEMENT	43200	914	12	5.61816	350	8772	2.8	0.35	0.35	8100
1104613	60	32	39	0.223581	1.130000	Intel-32t-2s	G	43200	1108	11	5.46751	350	9886.25	2.8	0.35	0.35	8880
1104613	60	32	4	0.078366	1.440000	Intel-32t-2s	G	43200	10800	90	69.4278	350	7614.75	2.8	0.35	0.35	1440
1104613	60	32	40	0.201805	1.120000	Intel-32t-2s	G	43200	1080	14	5.97407	350	9055.3	2.8	0.35	0.35	8160
1104613	60	32	4	0.079134	1.400000	Intel-32t-2s	GUPDATE	43200	10800	90	69.4278	350	7614.75	2.8	0.35	0.35	1428
1104613	60	32	40	0.219352	1.190000	Intel-32t-2s	GUPDATE	43200	1080	12	6.25556	350	8798.5	2.8	0.35	0.35	7920
1104613	60	32	40	0.115781	1.050000	Intel-32t-2s	GSTOP	43200	1278	17	12.3865	350	4154.65	2.8	0.35	0.35	3728
1104613	60	32	40	0.219903	1.200000	Intel-32t-2s	GUPDATE	43200	1080	12	6.25556	350	8798.5	2.8	0.35	0.35	7920
1104613	60	32	40	0.113888	1.080000	Intel-32t-2s	GSTOP	43200	1278	17	12.3865	350	4154.65	2.8	0.35	0.35	3728
1104613	60	32	40	0.114496	1.040000	Intel-32t-2s	GSTOP_REFINEMENT	43200	1221	18	12.6183	350	4111.7	2.8	0.35	0.35	3749
1104613	60	32	40	0.213511	1.140000	Intel-32t-2s	GUPDATE_REFINEMENT	43200	907	13	5.98567	350	8578.35	2.8	0.35	0.35	7920
1104613	60	32	40	0.202004	1.120000	Intel-32t-2s	G	43200	1080	14	5.97407	350	9055.3	2.8	0.35	0.35	8160
1104613	60	32	40	0.219066	1.180000	Intel-32t-2s	GUPDATE	43200	1080	12	6.25556	350	8798.5	2.8	0.35	0.35	7920
1104613	60	32	40	0.116846	1.090000	Intel-32t-2s	GSTOP	43200	1278	17	12.3865	350	4154.65	2.8	0.35	0.35	3728
1104613	60	32	40	0.109798	1.040000	Intel-32t-2s	GSTOP_REFINEMENT	43200	1221	18	12.6183	350	4111.7	2.8	0.35	0.35	3749
1104613	60	32	40	0.209212	1.130000	Intel-32t-2s	GUPDATE_REFINEMENT	43200	907	13	5.98567	350	8578.35	2.8	0.35	0.35	7920
1104613	60	32	40	0.199684	1.110000	Intel-32t-2s	G	43200	1080	14	5.97407	350	9055.3	2.8	0.35	0.35	8160
1104613	60	32	41	0.220712	1.130000	Intel-32t-2s	G	43200	1054	11	5.48956	350	9798.9	2.8	0.35	0.35	8842
1104613	60	32	4	0.083863	1.520000	Intel-32t-2s	GSTOP	43200	10800	90	69.4278	350	7614.75	2.8	0.35	0.35	1440
1104613	60	32	4	0.079193	1.430000	Intel-32t-2s	GUPDATE	43200	10800	90	69.4278	350	7614.75	2.8	0.35	0.35	1428
1104613	60	32	41	0.214992	1.130000	Intel-32t-2s	GUPDATE	43200	1054	12	5.79886	350	9199.05	2.8	0.35	0.35	8309
1104613	60	32	4	0.150152	2.920000	Intel-32t-2s	GSTOP	43200	10800	90	69.4278	350	7614.75	2.8	0.35	0.35	1440
1104613	60	32	41	0.097170	1.050000	Intel-32t-2s	GSTOP	43200	1568	19	13.3642	350	3659.65	2.8	0.35	0.35	3204
1104613	60	32	41	0.230986	1.200000	Intel-32t-2s	GUPDATE	43200	1054	12	5.79886	350	9199.05	2.8	0.35	0.35	8309
1104613	60	32	41	0.108557	1.100000	Intel-32t-2s	GSTOP	43200	1568	19	13.3642	350	3659.65	2.8	0.35	0.35	3204
1104613	60	32	41	0.103115	1.050000	Intel-32t-2s	GSTOP_REFINEMENT	43200	1520	20	13.6336	350	3609.9	2.8	0.35	0.35	3237
1104613	60	32	41	0.219472	1.130000	Intel-32t-2s	GUPDATE_REFINEMENT	43200	879	11	5.4198	350	8973.3	2.8	0.35	0.35	8309
1104613	60	32	41	0.238285	1.190000	Intel-32t-2s	G	43200	1054	11	5.48956	350	9798.9	2.8	0.35	0.35	8842
1104613	60	32	41	0.227916	1.170000	Intel-32t-2s	GUPDATE	43200	1054	12	5.79886	350	9199.05	2.8	0.35	0.35	8309
1104613	60	32	41	0.111017	1.070000	Intel-32t-2s	GSTOP	43200	1568	19	13.3642	350	3659.65	2.8	0.35	0.35	3204
1104613	60	32	41	0.103231	1.040000	Intel-32t-2s	GSTOP_REFINEMENT	43200	1520	20	13.6336	350	3609.9	2.8	0.35	0.35	3237
1104613	60	32	41	0.221332	1.130000	Intel-32t-2s	GUPDATE_REFINEMENT	43200	879	11	5.4198	350	8973.3	2.8	0.35	0.35	8309
1104613	60	32	41	0.237071	1.190000	Intel-32t-2s	G	43200	1054	11	5.48956	350	9798.9	2.8	0.35	0.35	8842
1104613	60	32	42	0.180008	1.110000	Intel-32t-2s	G	43200	1029	17	7.84159	350	7645.25	2.8	0.35	0.35	6912
1104613	60	32	4	0.112475	2.110000	Intel-32t-2s	GSTOP_REFINEMENT	43200	8249	75	42.4741	350	5844.5	2.8	0.35	0.35	1752
1104613	60	32	42	0.170861	1.090000	Intel-32t-2s	GUPDATE	43200	1029	17	8.01069	350	7411.8	2.8	0.35	0.35	6702
1104613	60	32	42	0.085835	1.040000	Intel-32t-2s	GSTOP	43200	1080	24	18.087	350	2886.35	2.8	0.35	0.35	2609
1104613	60	32	42	0.171033	1.090000	Intel-32t-2s	GUPDATE	43200	1029	17	8.01069	350	7411.8	2.8	0.35	0.35	6702
1104613	60	32	42	0.090056	1.070000	Intel-32t-2s	GSTOP	43200	1080	24	18.087	350	2886.35	2.8	0.35	0.35	2609
1104613	60	32	42	0.086970	1.040000	Intel-32t-2s	GSTOP_REFINEMENT	43200	1065	25	18.8357	350	2859.05	2.8	0.35	0.35	2613
1104613	60	32	42	0.176529	1.080000	Intel-32t-2s	GUPDATE_REFINEMENT	43200	881	17	7.94552	350	7196.55	2.8	0.35	0.35	6702
1104613	60	32	42	0.178838	1.110000	Intel-32t-2s	G	43200	1029	17	7.84159	350	7645.25	2.8	0.35	0.35	6912
1104613	60	32	42	0.171141	1.090000	Intel-32t-2s	GUPDATE	43200	1029	17	8.01069	350	7411.8	2.8	0.35	0.35	6702
1104613	60	32	42	0.087376	1.060000	Intel-32t-2s	GSTOP	43200	1080	24	18.087	350	2886.35	2.8	0.35	0.35	2609
1104613	60	32	42	0.092740	1.060000	Intel-32t-2s	GSTOP_REFINEMENT	43200	1065	25	18.8357	350	2859.05	2.8	0.35	0.35	2613
1104613	60	32	42	0.177704	1.090000	Intel-32t-2s	GUPDATE_REFINEMENT	43200	881	17	7.94552	350	7196.55	2.8	0.35	0.35	6702
1104613	60	32	42	0.179051	1.100000	Intel-32t-2s	G	43200	1029	17	7.84159	350	7645.25	2.8	0.35	0.35	6912
1104613	60	32	43	0.243254	1.190000	Intel-32t-2s	G	43200	1005	12	5.36219	350	9941.8	2.8	0.35	0.35	9015
1104613	60	32	4	0.099580	1.770000	Intel-32t-2s	GUPDATE_REFINEMENT	43200	8710	79	46.8011	350	6175.25	2.8	0.35	0.35	1704
1104613	60	32	43	0.243395	1.200000	Intel-32t-2s	GUPDATE	43200	1005	11	5.48856	350	9816.6	2.8	0.35	0.35	8929
1104613	60	32	43	0.139939	1.040000	Intel-32t-2s	GSTOP	43200	1378	15	9.8926	350	5635.7	2.8	0.35	0.35	5063
1104613	60	32	43	0.225481	1.130000	Intel-32t-2s	GUPDATE	43200	1005	11	5.48856	350	9816.6	2.8	0.35	0.35	8929
1104613	60	32	43	0.144610	1.090000	Intel-32t-2s	GSTOP	43200	1378	15	9.8926	350	5635.7	2.8	0.35	0.35	5063
1104613	60	32	43	0.143189	1.050000	Intel-32t-2s	GSTOP_REFINEMENT	43200	1251	14	9.86171	350	5519.1	2.8	0.35	0.35	5063
1104613	60	32	43	0.236491	1.140000	Intel-32t-2s	GUPDATE_REFINEMENT	43200	818	11	5.19682	350	9580	2.8	0.35	0.35	8929
1104613	60	32	43	0.226843	1.130000	Intel-32t-2s	G	43200	1005	12	5.36219	350	9941.8	2.8	0.35	0.35	9015
1104613	60	32	43	0.223582	1.120000	Intel-32t-2s	GUPDATE	43200	1005	11	5.48856	350	9816.6	2.8	0.35	0.35	8929
1104613	60	32	43	0.136203	1.040000	Intel-32t-2s	GSTOP	43200	1378	15	9.8926	350	5635.7	2.8	0.35	0.35	5063
1104613	60	32	43	0.144356	1.060000	Intel-32t-2s	GSTOP_REFINEMENT	43200	1251	14	9.86171	350	5519.1	2.8	0.35	0.35	5063
1104613	60	32	43	0.230276	1.130000	Intel-32t-2s	GUPDATE_REFINEMENT	43200	818	11	5.19682	350	9580	2.8	0.35	0.35	8929
1104613	60	32	43	0.227854	1.140000	Intel-32t-2s	G	43200	1005	12	5.36219	350	9941.8	2.8	0.35	0.35	9015
1104613	60	32	44	0.247228	1.150000	Intel-32t-2s	G	43200	982	12	5.00305	350	10861.5	2.8	0.35	0.35	9892
1104613	60	32	4	0.077657	1.410000	Intel-32t-2s	G	43200	10800	90	69.4278	350	7614.75	2.8	0.35	0.35	1440
1104613	60	32	44	0.229708	1.120000	Intel-32t-2s	GUPDATE	43200	982	10	5.17515	350	10154.6	2.8	0.35	0.35	9232
1104613	60	32	44	0.127227	1.120000	Intel-32t-2s	GSTOP	43200	1520	18	12.9362	350	4458.45	2.8	0.35	0.35	3976
1104613	60	32	44	0.247021	1.180000	Intel-32t-2s	GUPDATE	43200	982	10	5.17515	350	10154.6	2.8	0.35	0.35	9232
1104613	60	32	44	0.124817	1.110000	Intel-32t-2s	GSTOP	43200	1520	18	12.9362	350	4458.45	2.8	0.35	0.35	3976
1104613	60	32	44	0.122529	1.080000	Intel-32t-2s	GSTOP_REFINEMENT	43200	1446	20	12.5062	350	4402.8	2.8	0.35	0.35	4006
1104613	60	32	44	0.244818	1.150000	Intel-32t-2s	GUPDATE_REFINEMENT	43200	812	10	4.97906	350	9890	2.8	0.35	0.35	9232
1104613	60	32	44	0.261526	1.190000	Intel-32t-2s	G	43200	982	12	5.00305	350	10861.5	2.8	0.35	0.35	9892
1104613	60	32	44	0.242734	1.170000	Intel-32t-2s	GUPDATE	43200	982	10	5.17515	350	10154.6	2.8	0.35	0.35	9232
1104613	60	32	44	0.118031	1.060000	Intel-32t-2s	GSTOP	43200	1520	18	12.9362	350	4458.45	2.8	0.35	0.35	3976
1104613	60	32	44	0.120561	1.080000	Intel-32t-2s	GSTOP_REFINEMENT	43200	1446	20	12.5062	350	4402.8	2.8	0.35	0.35	4006
1104613	60	32	44	0.246772	1.170000	Intel-32t-2s	GUPDATE_REFINEMENT	43200	812	10	4.97906	350	9890	2.8	0.35	0.35	9232
1104613	60	32	44	0.263142	1.210000	Intel-32t-2s	G	43200	982	12	5.00305	350	10861.5	2.8	0.35	0.35	9892
1104613	60	32	45	0.229526	1.150000	Intel-32t-2s	G	43200	960	11	5.33229	350	10124.9	2.8	0.35	0.35	9225
1104613	60	32	4	0.091647	1.730000	Intel-32t-2s	GUPDATE	43200	10800	90	69.4278	350	7614.75	2.8	0.35	0.35	1428
1104613	60	32	45	0.227870	1.160000	Intel-32t-2s	GUPDATE	43200	960	11	5.46042	350	9430.1	2.8	0.35	0.35	8595
1104613	60	32	45	0.116353	1.100000	Intel-32t-2s	GSTOP	43200	1437	20	13.8942	350	4226.7	2.8	0.35	0.35	3801
1104613	60	32	45	0.218101	1.130000	Intel-32t-2s	GUPDATE	43200	960	11	5.46042	350	9430.1	2.8	0.35	0.35	8595
1104613	60	32	45	0.123679	1.120000	Intel-32t-2s	GSTOP	43200	1437	20	13.8942	350	4226.7	2.8	0.35	0.35	3801
1104613	60	32	45	0.116110	1.080000	Intel-32t-2s	GSTOP_REFINEMENT	43200	1364	20	13.2441	350	4179.3	2.8	0.35	0.35	3804
1104613	60	32	45	0.225155	1.130000	Intel-32t-2s	GUPDATE_REFINEMENT	43200	803	11	5.38481	350	9208.55	2.8	0.35	0.35	8595
1104613	60	32	45	0.227886	1.130000	Intel-32t-2s	G	43200	960	11	5.33229	350	10124.9	2.8	0.35	0.35	9225
1104613	60	32	45	0.216549	1.120000	Intel-32t-2s	GUPDATE	43200	960	11	5.46042	350	9430.1	2.8	0.35	0.35	8595
1104613	60	32	45	0.115389	1.090000	Intel-32t-2s	GSTOP	43200	1437	20	13.8942	350	4226.7	2.8	0.35	0.35	3801
1104613	60	32	45	0.113843	1.070000	Intel-32t-2s	GSTOP_REFINEMENT	43200	1364	20	13.2441	350	4179.3	2.8	0.35	0.35	3804
1104613	60	32	45	0.226105	1.140000	Intel-32t-2s	GUPDATE_REFINEMENT	43200	803	11	5.38481	350	9208.55	2.8	0.35	0.35	8595
[truncated: 772 more rows]
